# Supplementary material
Source: PubMed Central journal article supplement (PMC6421849)
Supplement: NIHMS1006632-supplement-Supplement.pdf [file NIHMS1006632-supplement-Supplement.pdf]

## Supplementary Online Content

Janecka M, Kodesh A, Levine SZ, et al. Association of autism spectrum disorder with prenatal exposure to medication affecting neurotransmitter systems. *JAMA Psychiatry*. Published online October 31, 2018. doi:10.1001/jamapsychiatry.2018.2728

- eFigure 1.** Classification of Exposure and Inferences Drawn From Our Design vs Standard Design
- eFigure 2.** Reverse Kaplan-Meier Plot Illustrating Age-Specific Autism Prevalence in the Meuhedet Subcohort
- eFigure 3.** Study Cohort
- eFigure 4.** Models Tested in the Main Analyses
- eFigure 5.** Calculation of the Family-Based Sampling Probabilities and Weights Used in the Regression
- eFigure 6.** Proportion of Individuals Exposed to Drugs With Different ATC Codes, Within Each Acetylcholine Medication Group
- eFigure 7.** Proportion of Individuals Exposed to Drugs With Different ATC Codes, Within Each (Nor)adrenaline Medication Group
- eFigure 8.** Proportion of Individuals Exposed to Drugs With Different ATC Codes, Within Each Dopamine Medication Group
- eFigure 9.** Proportion of Individuals Exposed to Drugs With Different ATC Codes, Within Each GABA/Glutamate Medication Group
- eFigure 10.** Proportion of Individuals Exposed to Drugs With Different ATC Codes, Within Each GABA/Glutamate Medication Group
- eFigure 11.** Proportion of Individuals Exposed to Drugs With Different ATC Codes, Within Each Serotonin (5HT) Medication Group
- eFigure 12.** Proportion of Individuals Exposed to Drugs With Different ATC Codes, Within Each Adenosine, Histamine, and Vesicular Amine Transporter Medication Group
- eFigure 13.** Kaplan-Meier Plots Showing Risk in Different Exposure and Covariate Groups
- eFigure 14.** ASD Rates in the Subcohort in Relation to the Number of Maternal Diagnoses Between Year Before Pregnancy Start and Child's Date of Birth
- eTable 1.** Comparison of Prescription Rates in Israeli Meuhedet Data and Swedish National Register
- eTable 2.** Drug Categories: ATC Codes and Names of the Medications
- eTable 3.** Drug Categories: Common Indications
- eTable 4.** Drug Categories: Exposure Numbers by ASD Diagnosis
- eTable 5.** ICD Codes Used to Identify Cases of ASD
- eTable 6.** ICD Codes Used to Identify Mothers With a History of Psychiatric and Neurological Disorders
- eTable 7.** Demographic Characteristics of the Full Sample
- eTable 8.** Schoenfeld Residuals for All Tested Medication Groups
- eTable 9.** Associations Between Prenatal Exposure to Medications and Subsequent Diagnosis of ASD in the Subsample With SES Data
- eTable 10.** Associations Between Prenatal Exposure to Medications and Subsequent Diagnosis of ASD, Adjusting for Paternal Age
- eTable 11.** Associations Between Prenatal Exposure to Medications and Subsequent Diagnosis of ASD, Full Set of Results, Considering Indications 5 and 1 Year Before the Start of Pregnancy
- eTable 12.** Associations Between Prenatal Exposure to Medications and Subsequent Diagnosis of ASD, Full Set of Results, in a Sample Without Sibling Matches
- eTable 13.** Associations Between Prenatal Exposure to Medications and Subsequent Diagnosis of ASD, in a Permuted Sample With Random Assignment of ASD Diagnosis to the Cohort Members
- eTable 14.** Calculations of Necessary Increases in the Standard Errors to Render the Observed Associations Nonsignificant

This supplementary material has been provided by the authors to give readers additional information about their work.

**eFigure 1. Classification of Exposure and Inferences Drawn From Our Design vs Standard Design**

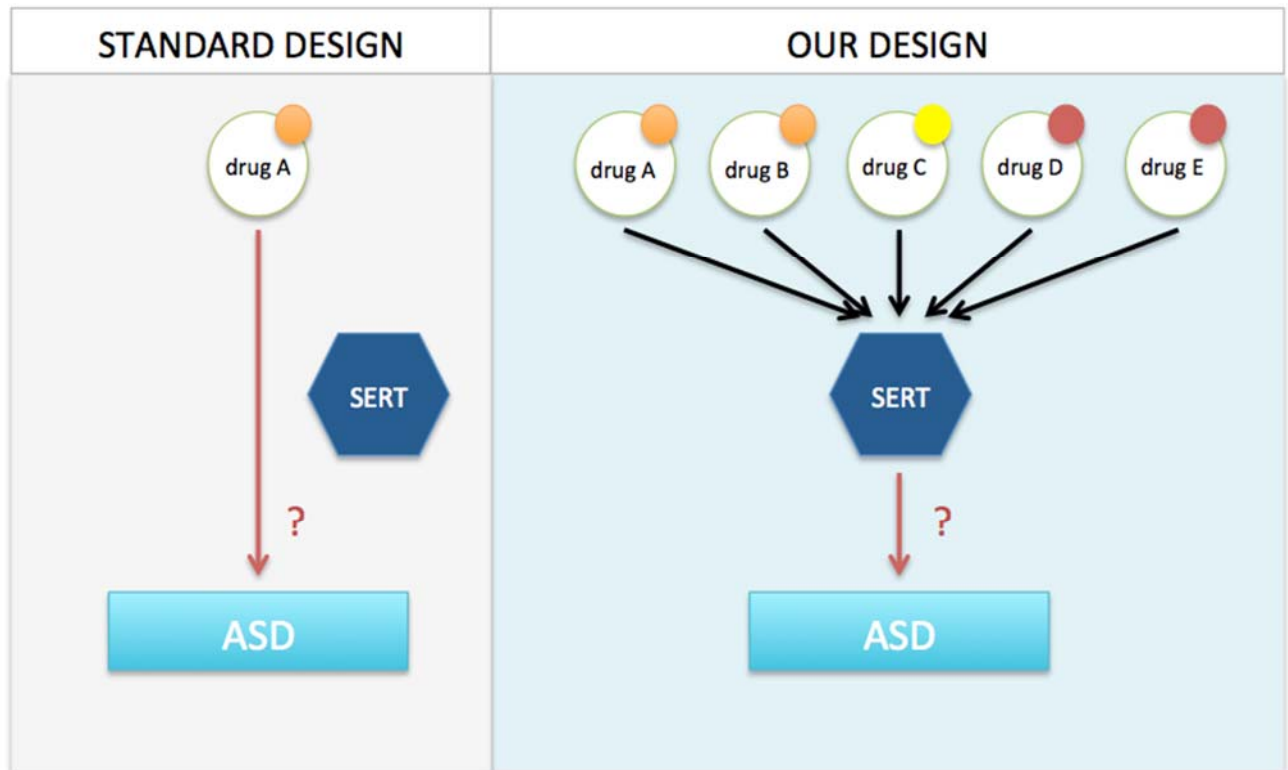

Traditionally, exposure to single (drug A) / narrow group of medications was tested for an association with ASD, and presence of significant effects was interpreted as suggestive of involvement of the drug's target in the disease etiology (left box). Under this scenario, there exists a strong association between the exposure, and other factors that are associated with the medication use (e.g. physiological effects of the underlying indication, familial effects - here represented by an orange dot). Instead, our approach first creates the "target signal", by grouping together several drugs (drugs A-E) that all act on certain target (e.g. serotonin transporter (SERT)), but are associated with different potentially confounding factors (yellow, orange and red dots), and only then tests the association of this signal with ASD (right box). The red arrow indicates the step at which the association with ASD is tested.

**eFigure 2.** Reverse Kaplan-Meier Plot Illustrating Age-Specific Autism Prevalence in the Meuhedet Subcohort

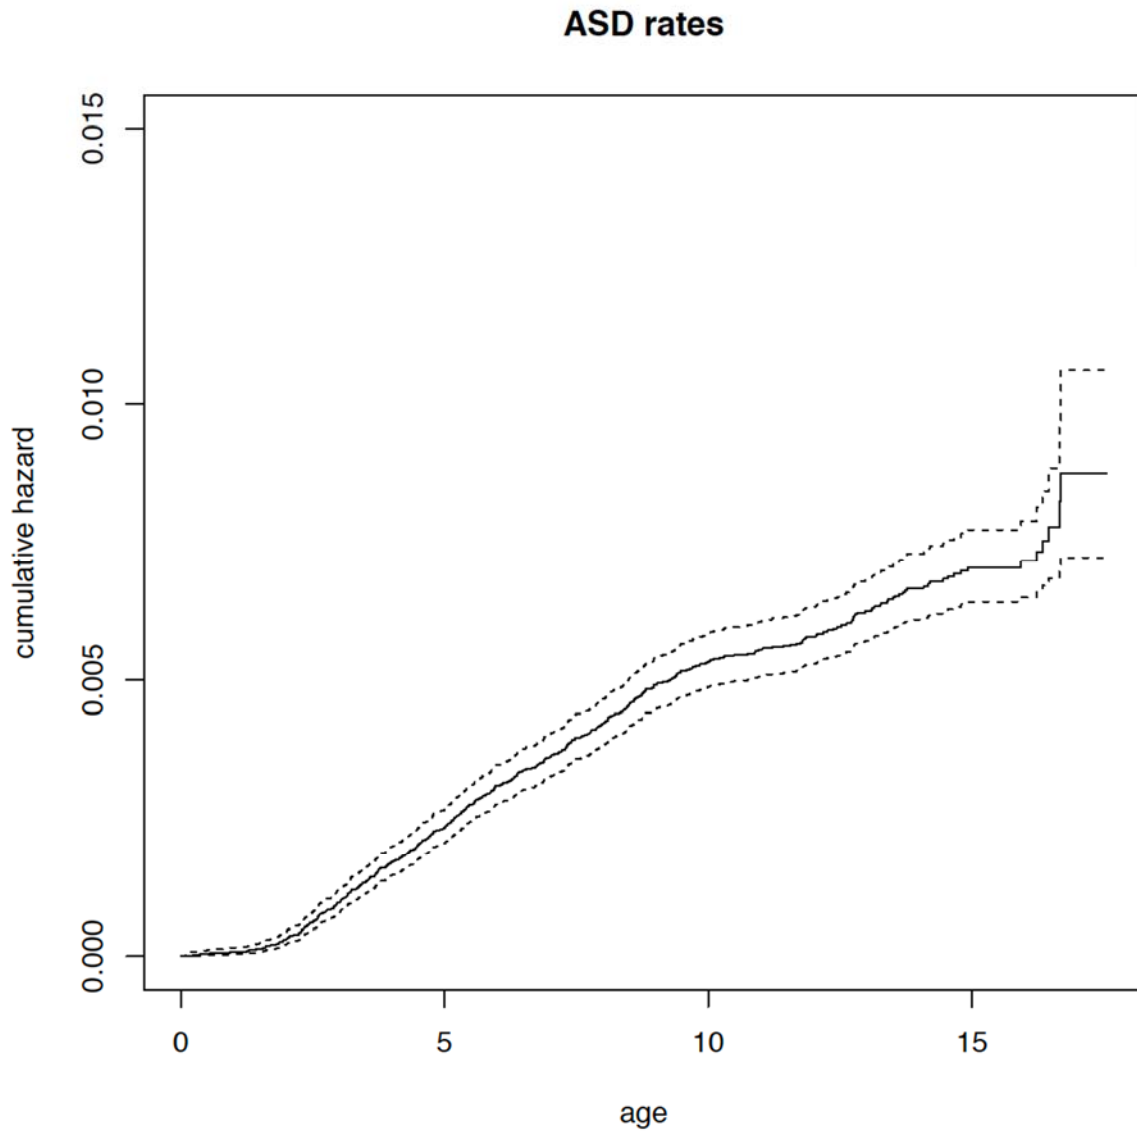

**eFigure 3. Study Cohort**

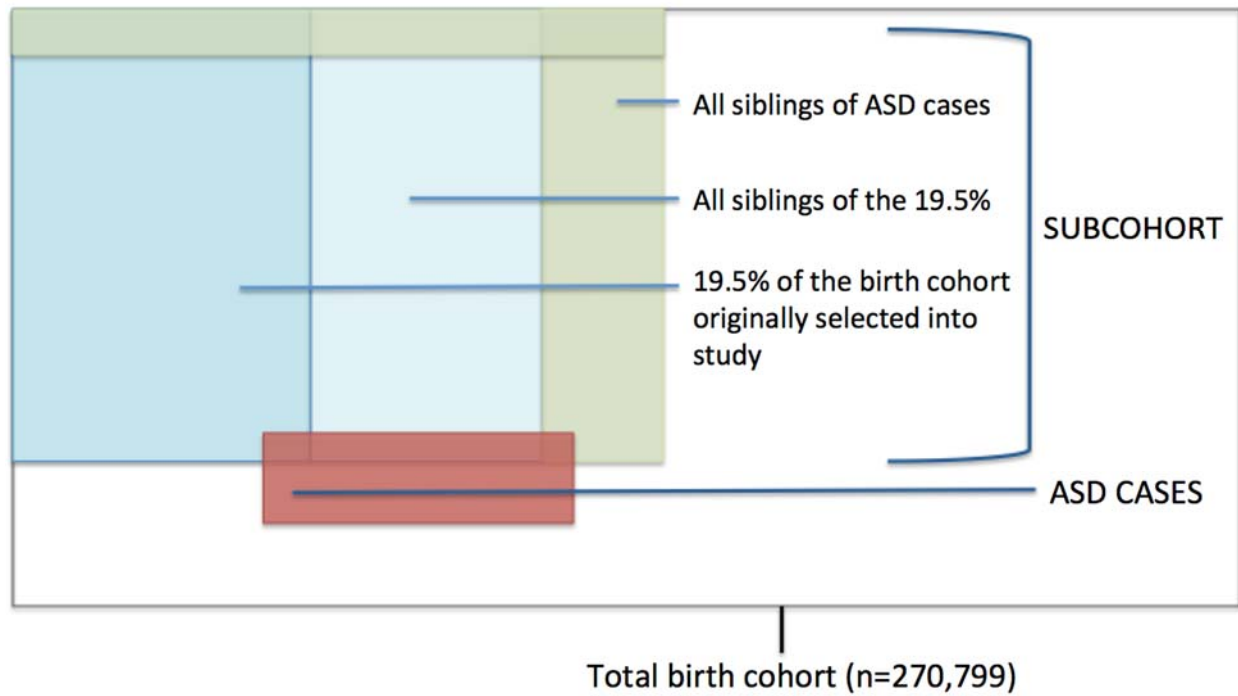

The total birth cohort comprised of 270,799 individuals, born between 1997 and 2007, and registered in the Meuhedet Health Maintenance Organization. For the study cohort, we selected random 19.5% of those individuals and all their siblings who were also born in the cohort years. Additionally, we selected all individuals diagnosed with ASD before end of follow-up period (26<sup>th</sup> January, 2015), as well as their siblings. The subgroups of (i) initial 19.5%, (ii) their siblings, and (iii) siblings of cases, were part of the final subcohort (35.6% of the total birth cohort). Due to random sampling strategies, there was a partial overlap between the groups i-iii in the subcohort (e.g. a child could be selected as a part of the random 19.5%, and as a sibling of a child with ASD), and those duplicates were removed from the sample prior to the analyses. For the same reason, the subcohort included some children with ASD diagnosis.

**eFigure 4. Models Tested in the Main Analyses**

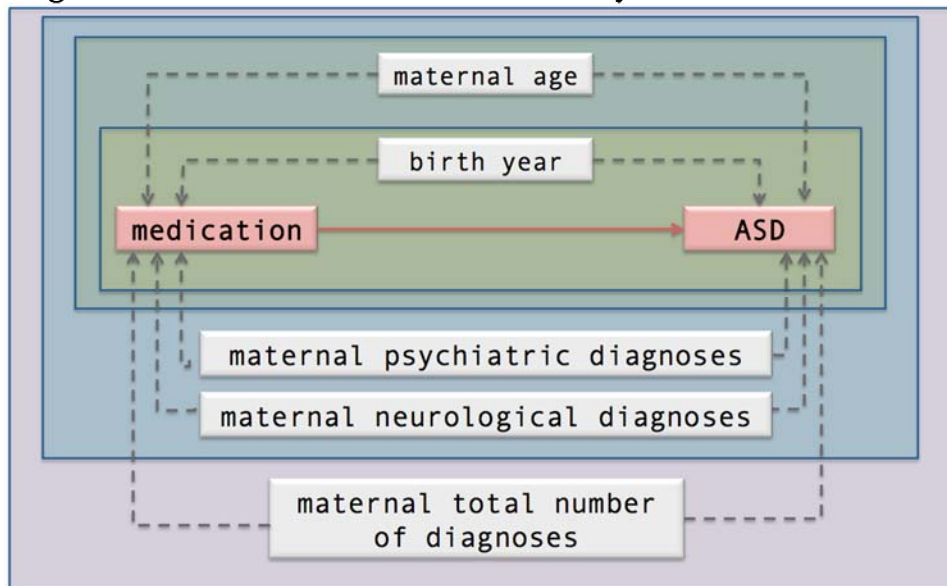

Model 1: exposure + year of birth. Model 2: Model 1 + maternal age at birth. Model 3: Model 2 + maternal history of affective disorders + maternal history of anxiety disorders + maternal history of psychotic disorders + maternal history of neurological disorders. Model 4: Model 3 + maternal number of diagnoses / health issues.

**eFigure 5. Calculation of the Family-Based Sampling Probabilities and Weights Used in the Regression**

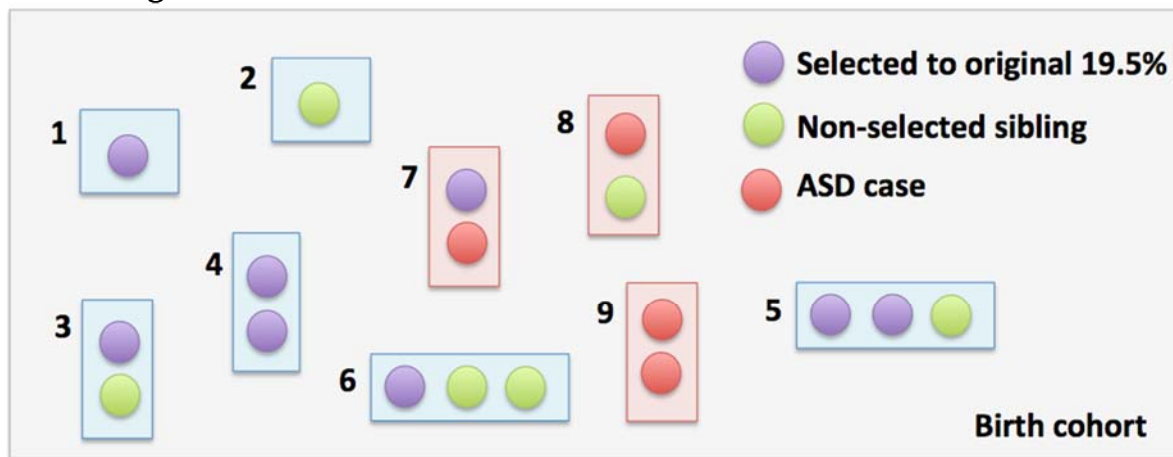

| Family | N children in family | N children in the original 19.5% | Siblings of the original 19.5% | ASD cases in family | Siblings of ASD cases | Not in the study cohort | (P) Selection for each child in family | Weights (inverse (P)) for each child in family |
|--------|----------------------|----------------------------------|--------------------------------|---------------------|-----------------------|-------------------------|----------------------------------------|------------------------------------------------|
| 1      | 1                    | 1                                | 0                              | 0                   | 0                     | 0                       | 0.195                                  | 5.128                                          |
| 2      | 1                    | 0                                | 0                              | 0                   | 0                     | 1                       | 0.195                                  | 5.128                                          |
| 3      | 2                    | 1                                | 1                              | 0                   | 0                     | 0                       | 0.352                                  | 2.841                                          |
| 4      | 2                    | 2                                | 0                              | 0                   | 0                     | 0                       | 0.352                                  | 2.841                                          |
| 5      | 3                    | 3                                | 0                              | 0                   | 0                     | 0                       | 0.540                                  | 1.853                                          |
| 6      | 3                    | 1                                | 2                              | 0                   | 0                     | 0                       | 0.540                                  | 1.853                                          |
| 7      | 2                    | 1                                | 0                              | 1                   | 0                     | 0                       | 1                                      | 1                                              |
| 8      | 2                    | 0                                | 0                              | 1                   | 1                     | 0                       | 1                                      | 1                                              |
| 9      | 2                    | 0                                | 0                              | 2                   | 0                     | 0                       | 1                                      | 1                                              |

All ASD cases and their siblings were included with a probability of 1 (families 7, 8, 9). For the rest of the cohort, the baseline probability of being selected is 0.195 (19.5% sample selected at random), increasing for children from larger families due to sibling sampling approach. E.g. in families 3-6, each child is selected if either him or his sibling is selected, thus the family probability for being in the study ( $A \cup B$ ) was 0.352, reflecting joint probability of two non-mutually exclusive events, each happening with a probability of 0.195. To obtain weights used in the regression, the probability of being selected was inverted, and was thus 1 for all cases (1/1), 5.128 for children from single-child families (1/0.195), etc.

**eFigure 6.** Proportion of Individuals Exposed to Drugs With Different ATC Codes, Within Each Acetylcholine Medication Group

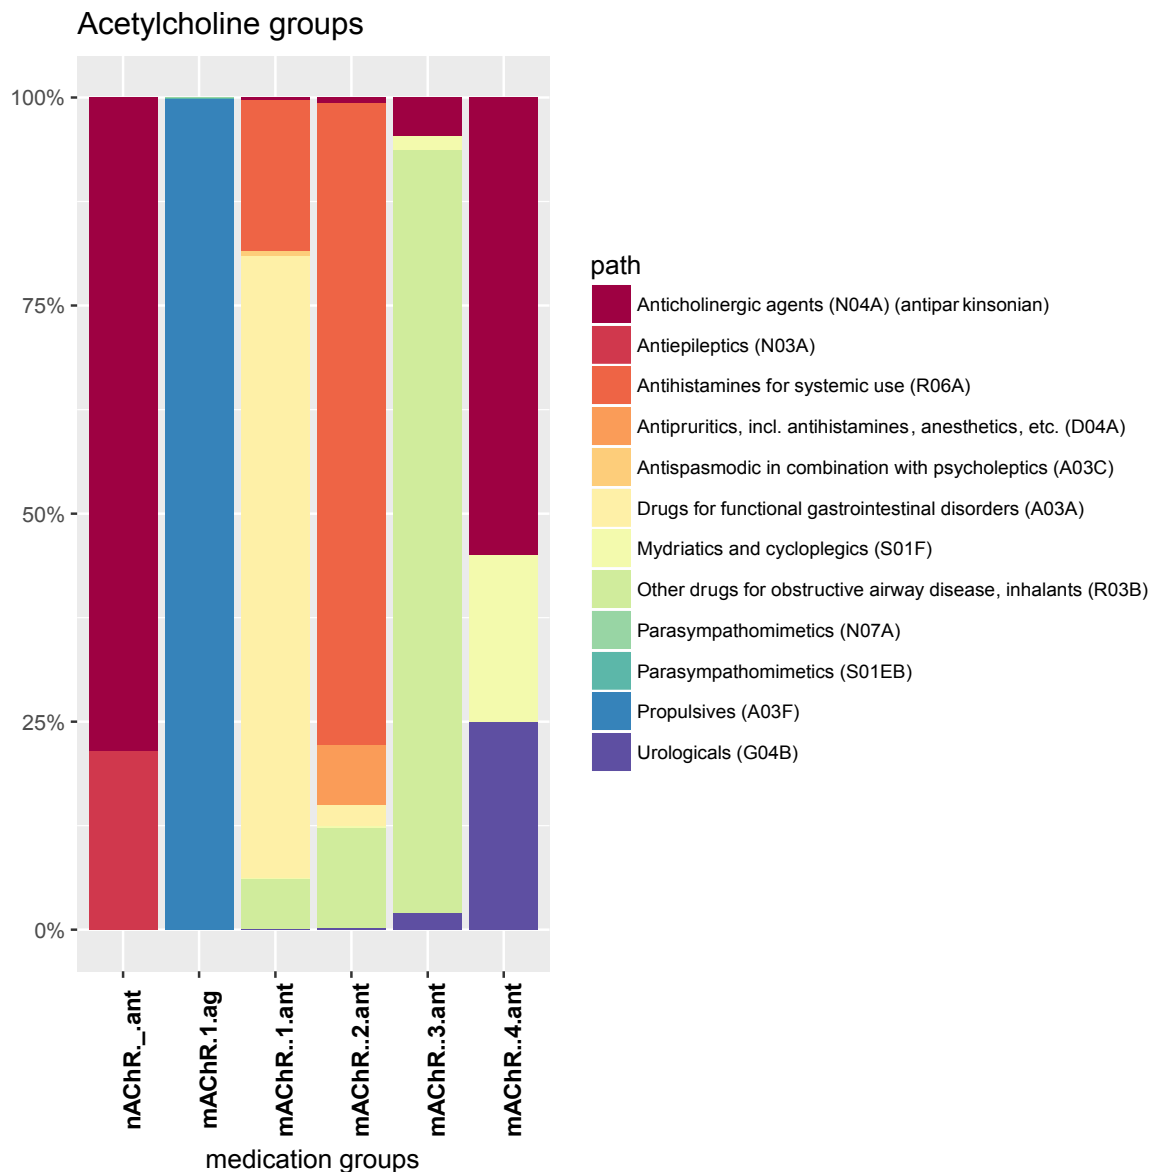

nAChR\_ant = neuronal acetylcholine receptor  $\alpha$  antagonists; mAChR.1.ag = muscarinic receptor 1 agonist; mAChR.1.ant = muscarinic receptor 1 antagonist; mAChR.2.ant = muscarinic receptor 2 antagonists; mAChR.3.ant = muscarinic receptor 3 antagonists; mAChR.4.ant = muscarinic receptor 4 antagonists.

**eFigure 7.** Proportion of Individuals Exposed to Drugs With Different ATC Codes, Within Each (Nor)adrenaline Medication Group

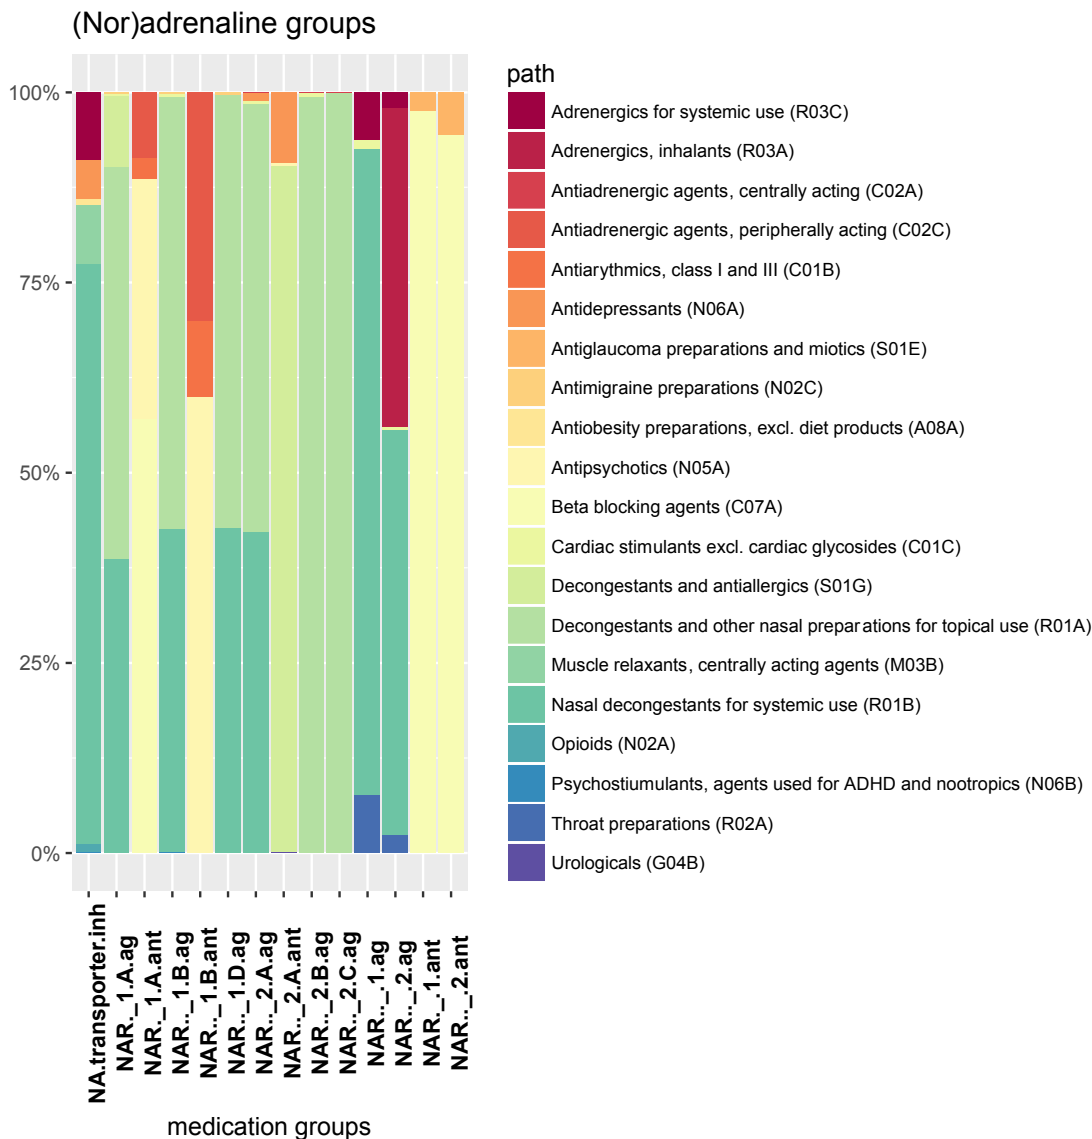

NA.transporter.inh = noradrenaline transporter inhibitors; NAR\_1.A.ag = adrenergic receptor  $\alpha$  1A agonists; NAR\_1.A.ant = adrenergic receptor  $\alpha$  1A antagonists; NAR\_1.B.ag = adrenergic receptor  $\alpha$  1B agonists; NAR\_1.B.ant = adrenergic receptor  $\alpha$  1B antagonists; NAR\_1.D.ag = adrenergic receptor  $\alpha$  1D agonists; NAR\_2.A.ag = adrenergic receptor  $\alpha$  2A agonists; NAR\_2.A.ant = adrenergic receptor  $\alpha$  2A antagonist; NAR\_2.B.ag = adrenergic receptor  $\alpha$  2B agonists; NAR\_2.C.ag = adrenergic receptor  $\alpha$  2C agonists; NAR\_1.ag = adrenergic receptor  $\beta$ 1 agonists; NAR\_1.ant = adrenergic receptor  $\beta$ 1 antagonists; NAR\_2.ag = adrenergic receptor  $\beta$ 2 agonists; NAR\_2.ant = adrenergic receptor  $\beta$ 2 antagonists.



**eFigure 8.** Proportion of Individuals Exposed to Drugs With Different ATC Codes, Within Each Dopamine Medication Group

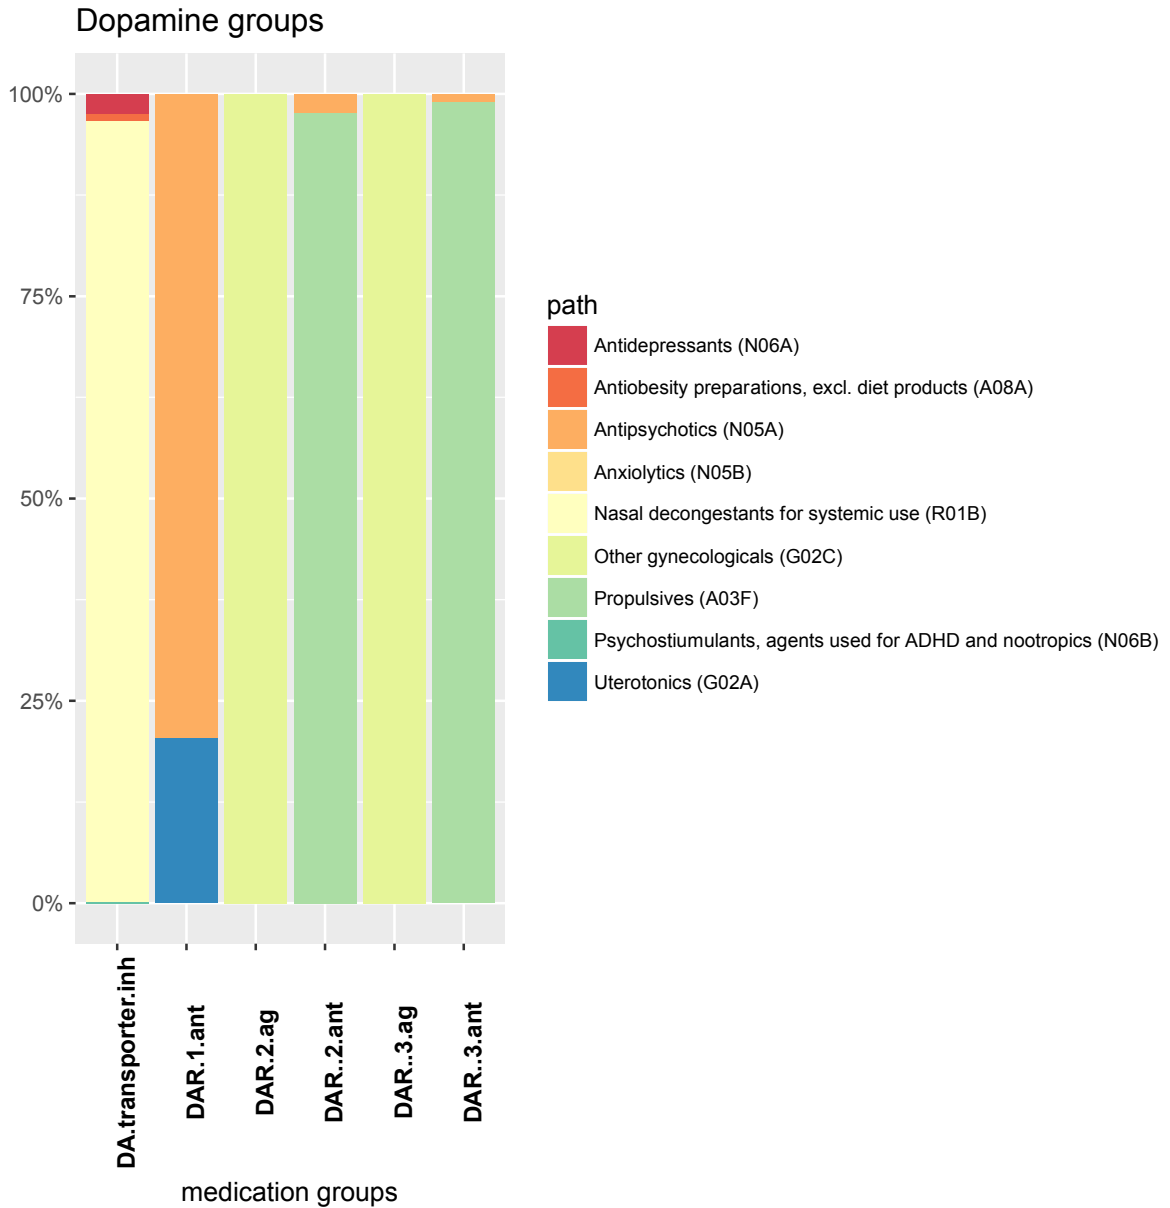

DA.transporter.inh = Dopamine transporter inhibitors; DAR.1.ant = dopamine receptor 1 antagonists; DAR.2.ag = dopamine receptor 2 agonist; DAR.2.ant = dopamine receptor 2 antagonists; DAR.3.ag = dopamine receptor 3 agonists; DAR.3.ant = dopamine receptor 3 antagonists.

**eFigure 9.** Proportion of Individuals Exposed to Drugs With Different ATC Codes, Within Each GABA/Glutamate Medication Group

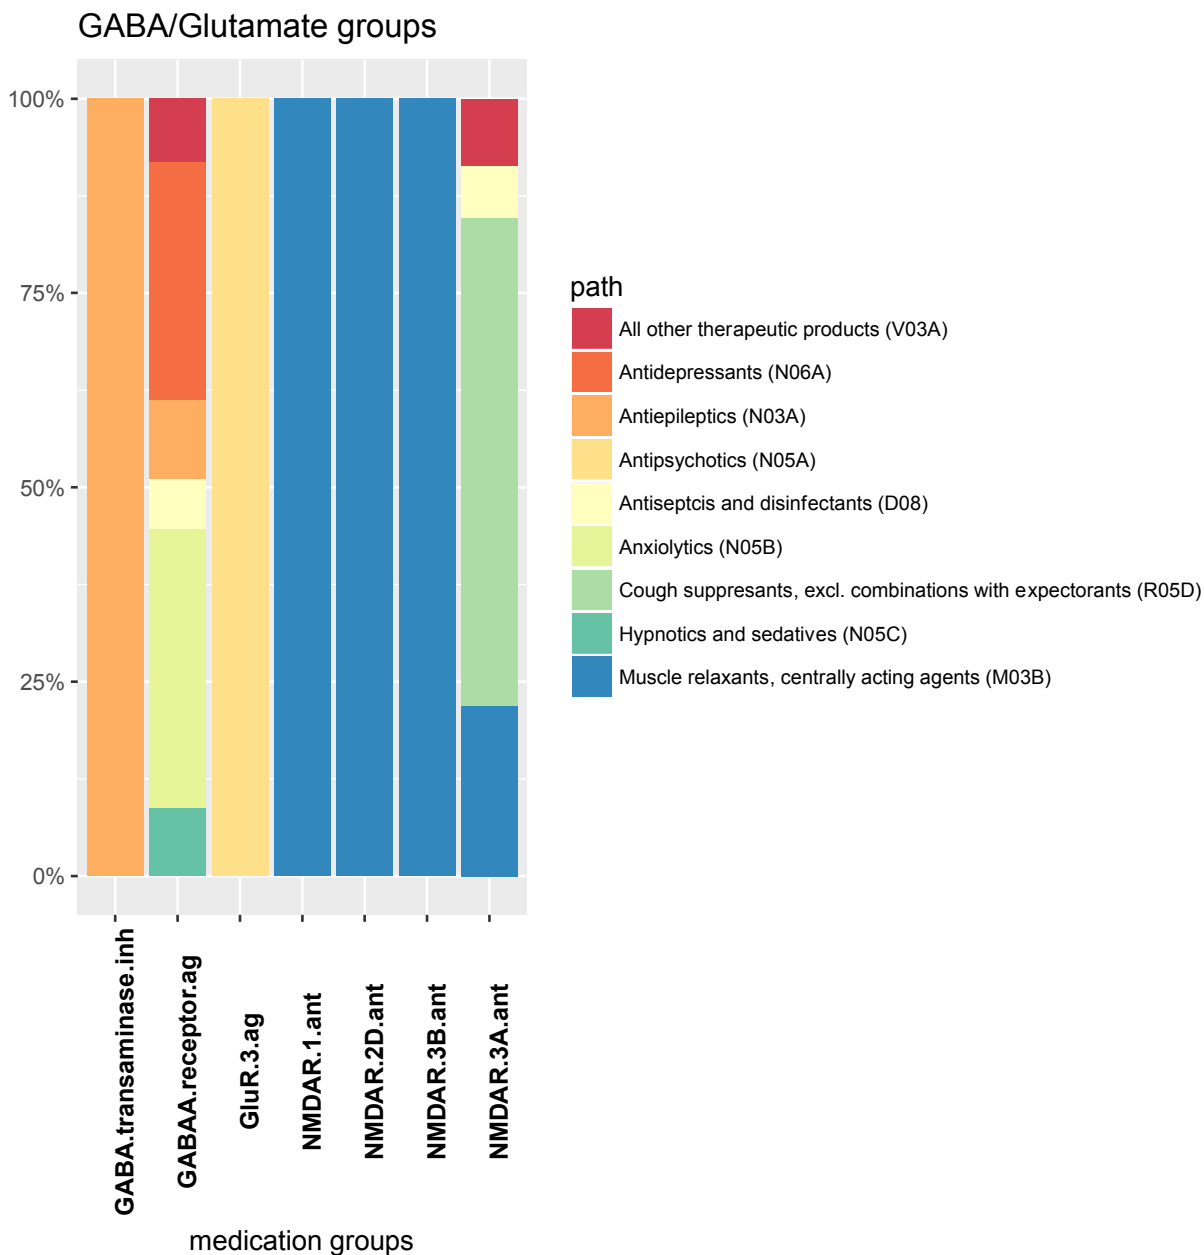

GABA.transaminase.inh = GABA transaminase inhibitors; GABAA.receptor.ag = GABAA receptor agonists; GluR.ag = glutamate receptor 3 agonists; NMDAR.1.ant = NMDA receptor 1 antagonists; NMDAR.2D.ant = NMDA receptor 2D antagonists; NMDAR.3B.ant = NMDA receptor 3B antagonists; NMDAR.3A.ant = NMDA receptor 3A antagonists.

**eFigure 10.** Proportion of Individuals Exposed to Drugs With Different ATC Codes, Within Each GABA/Glutamate Medication Group

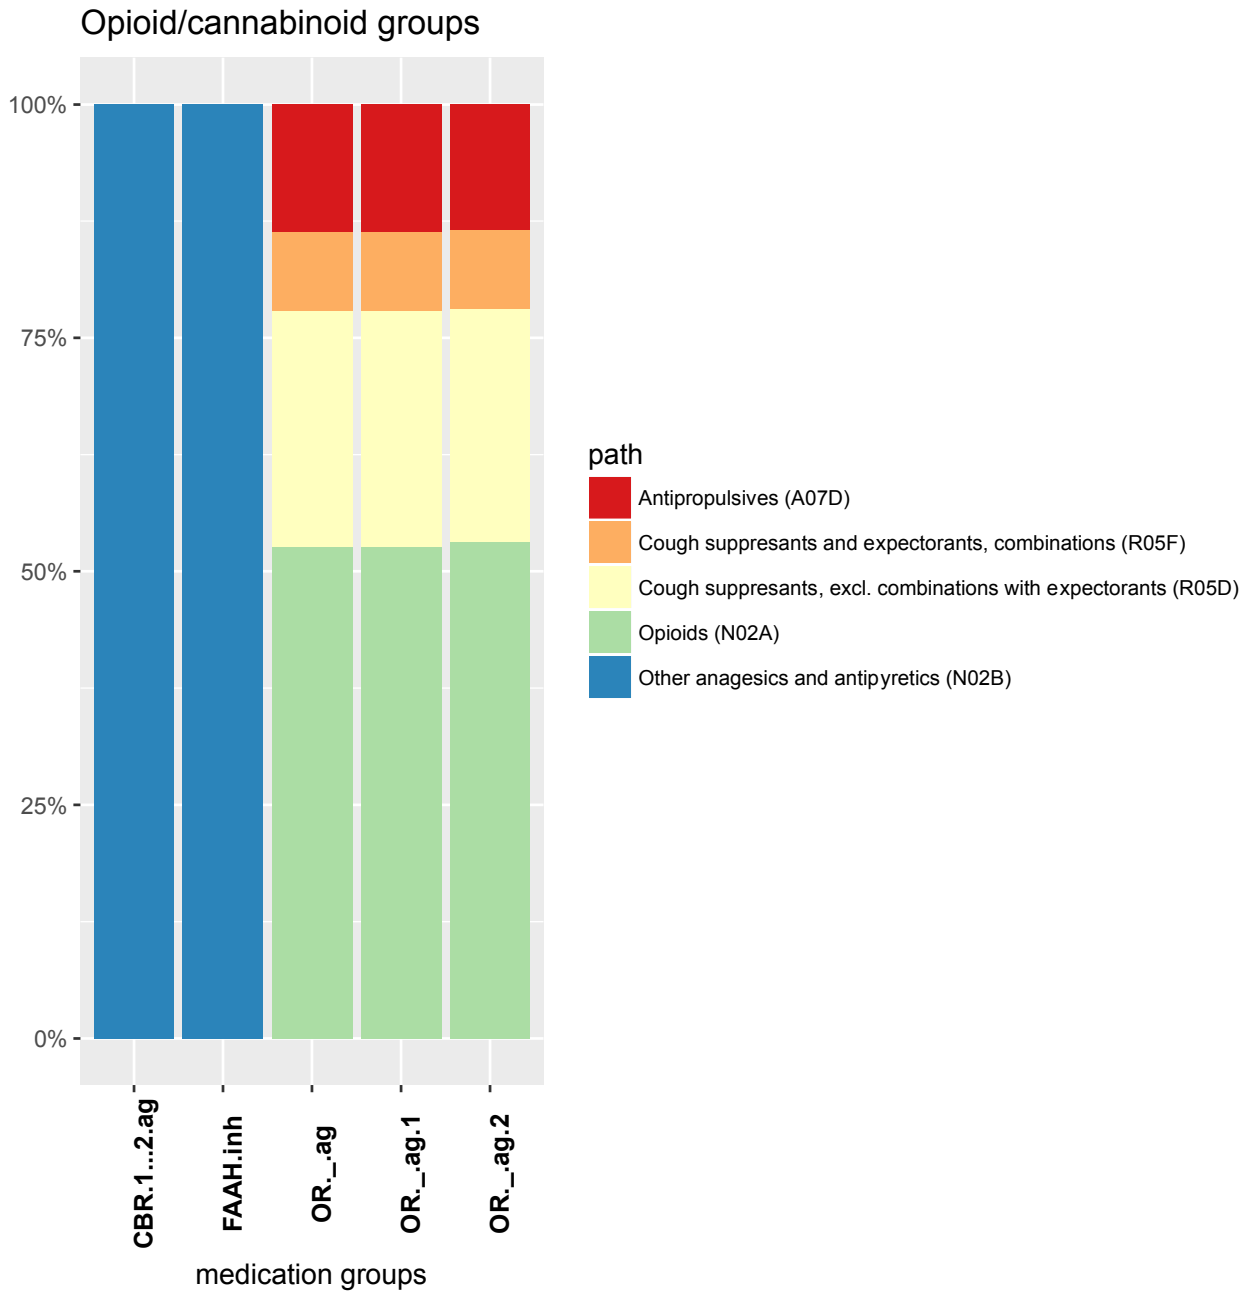

CBR.1.2.ag = cannabinoid receptor 1/2 agonists; FAAH.inh = fatty acid amide hydrolase inhibitors; OR\_ag = Opioid  $\kappa$  receptor agonists; OR\_ag.1 = opioid  $\epsilon$  receptor agonists; OR\_ag.2 = opioid  $\mu$  receptor agonists.

**eFigure 11.** Proportion of Individuals Exposed to Drugs With Different ATC Codes, Within Each Serotonin (5HT) Medication Group

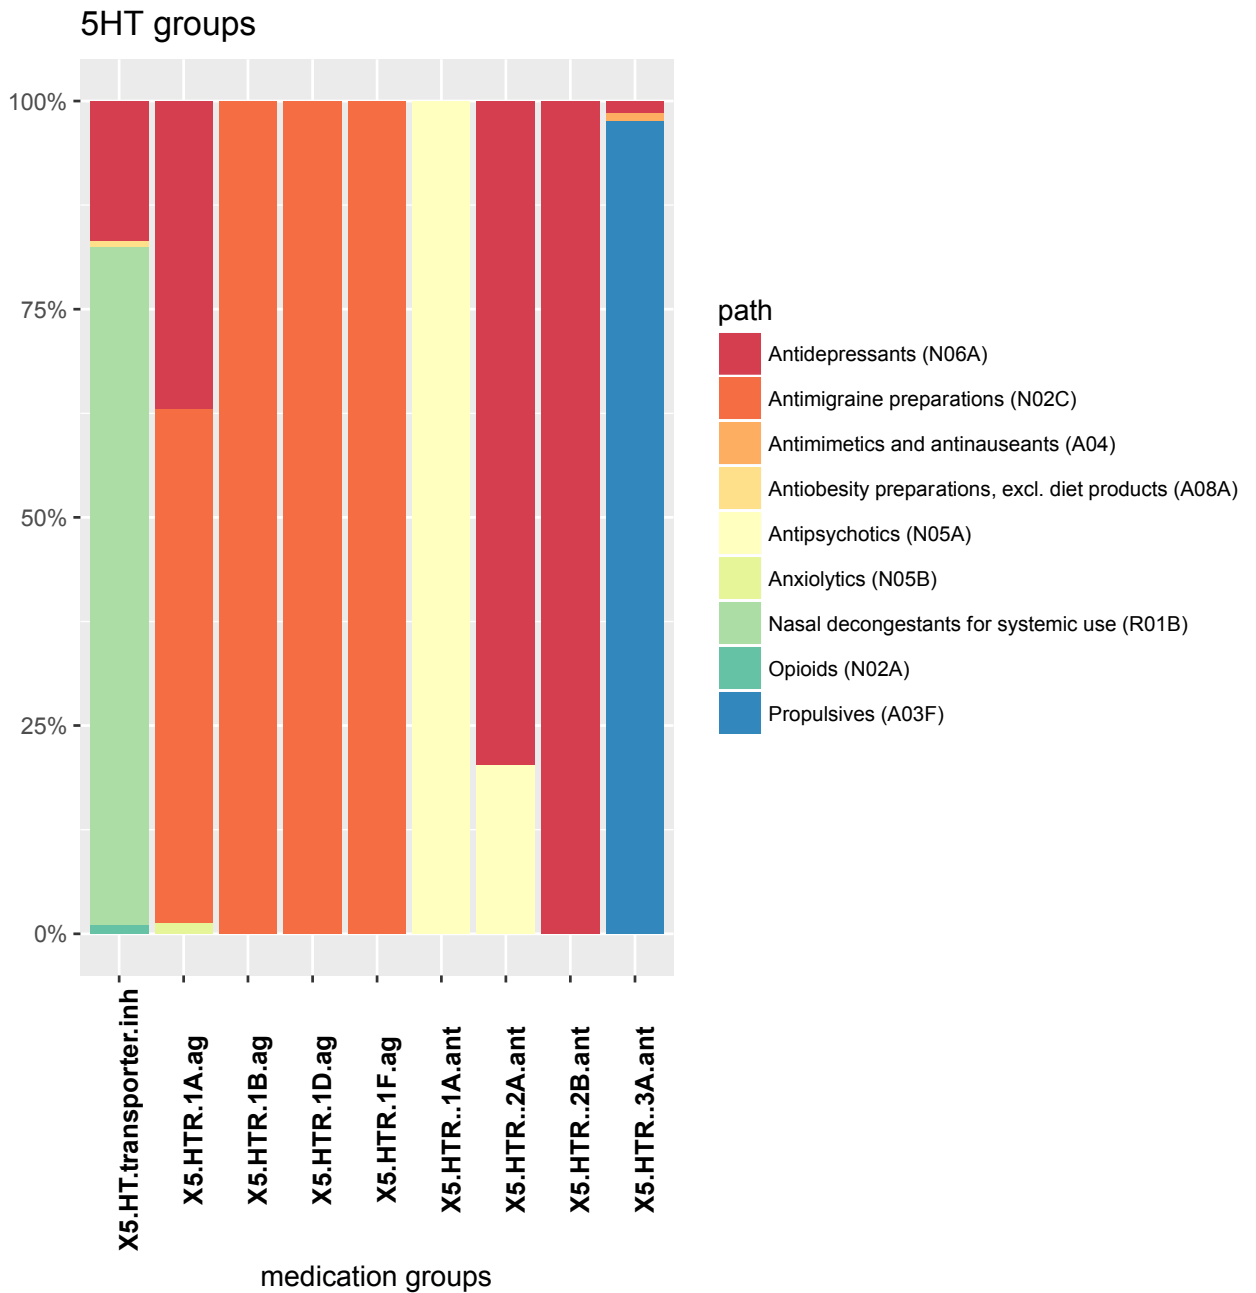

X5.HT.transporter.inh = serotonin re-uptake inhibitors; X5.HTR.1A.ag = serotonin receptor 1A agonists; X5.HTR.1B.ag = serotonin receptor 1B agonists; X5.HTR.1D.ag = serotonin receptor 1D agonists; X5.HTR.1F.ag = serotonin receptor 1F agonists; X5.HTR.1A.ant = serotonin receptor 1A antagonists; X5.HTR.2A.ant = serotonin receptor 2A antagonists; X5.HTR.2B.ant = serotonin receptor 2B antagonists; X5.HTR.3A.ant = serotonin receptor 3A antagonists.

**eFigure 12.** Proportion of Individuals Exposed to Drugs With Different ATC Codes, Within Each Adenosine, Histamine, and Vesicular Amine Transporter Medication Group

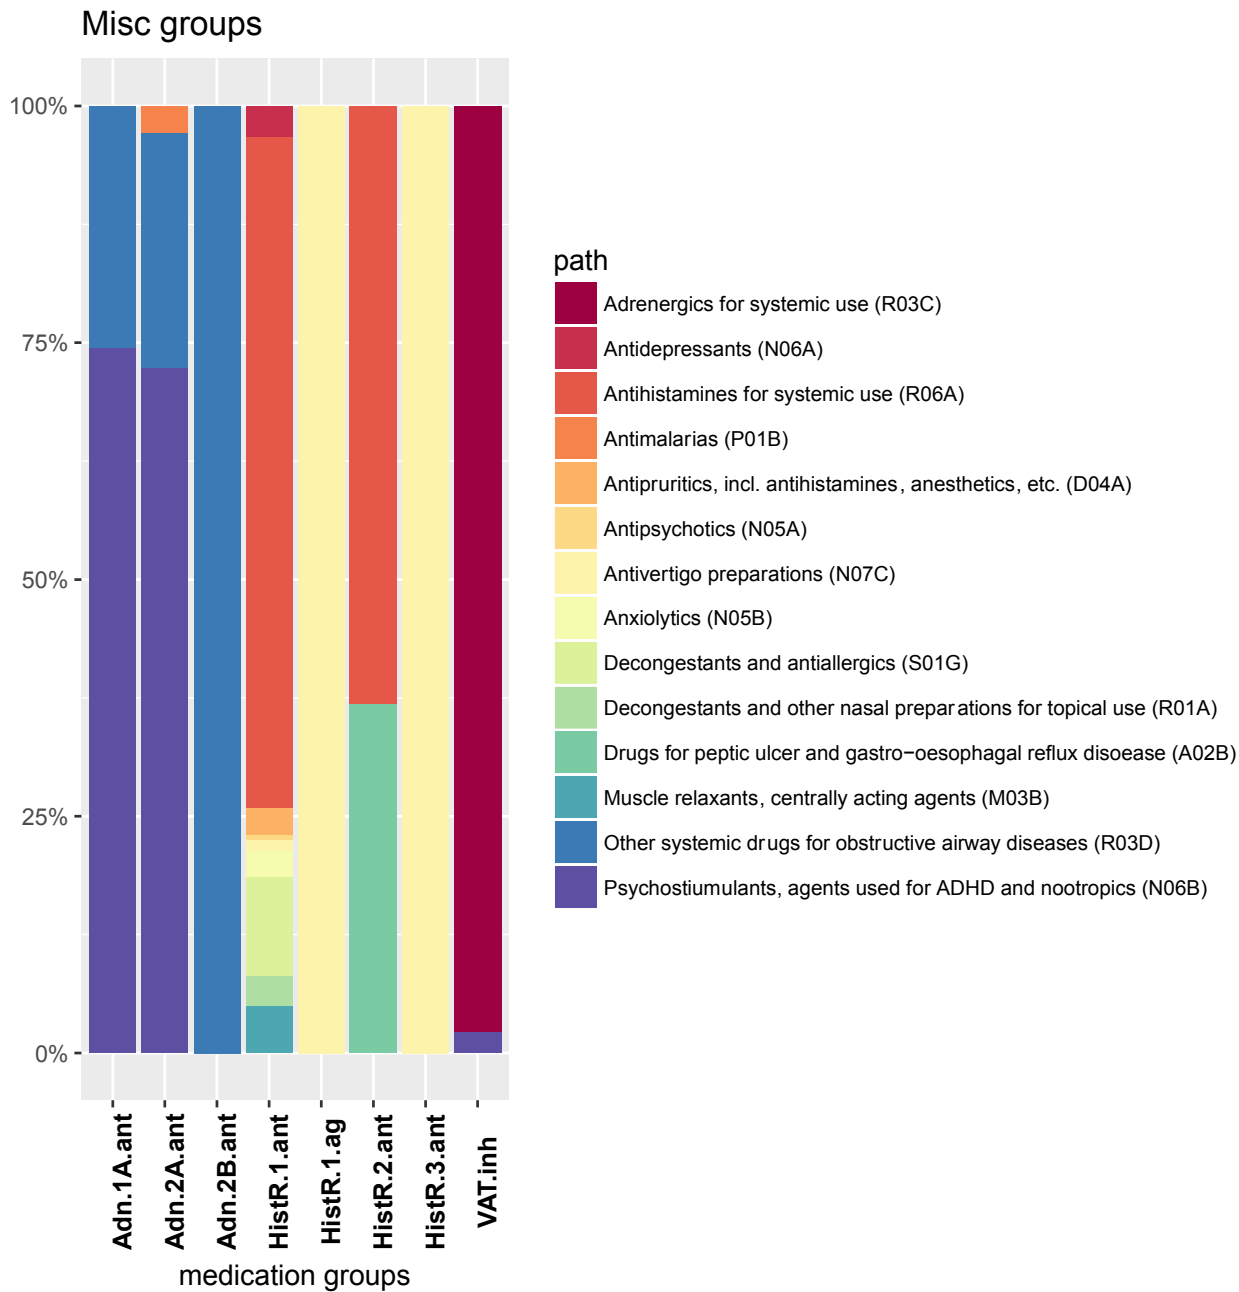

Adn.1A.ant = adenosine receptor A1 antagonists; Adn.2A.ant = adenosine receptor A 2A antagonists; Adn.2B.ant = adenosine receptor A 2B antagonist; HistR.1.ant = histamine receptor 1 antagonists; HistR.1.ag = histamine receptor 1 agonists; HistR.2.ant = histamine receptor 2 antagonists; HistR.3.ant = histamine receptor 3 antagonists; VAT.inh = vesicular amine transporter inhibitors.

**eFigure 13. Kaplan-Meier Plots Showing Risk in Different Exposure and Covariate Groups**

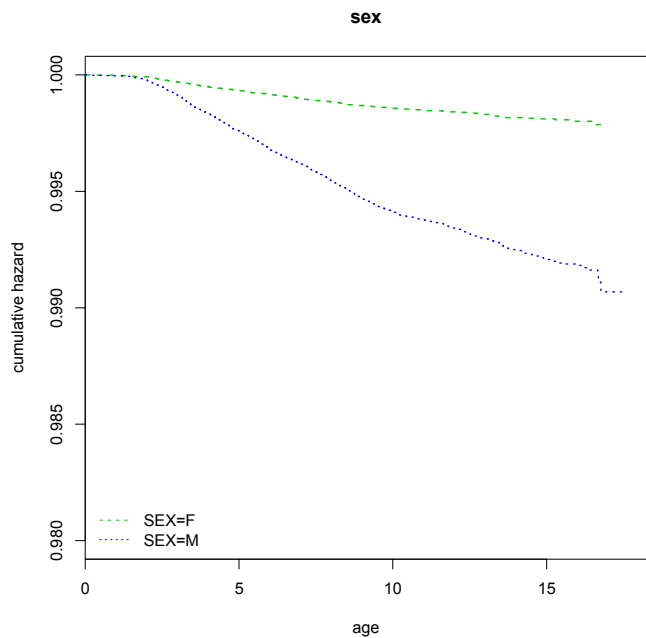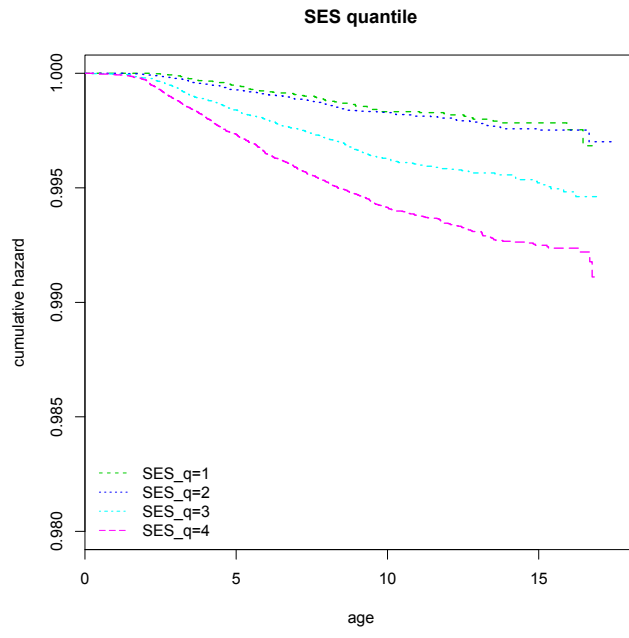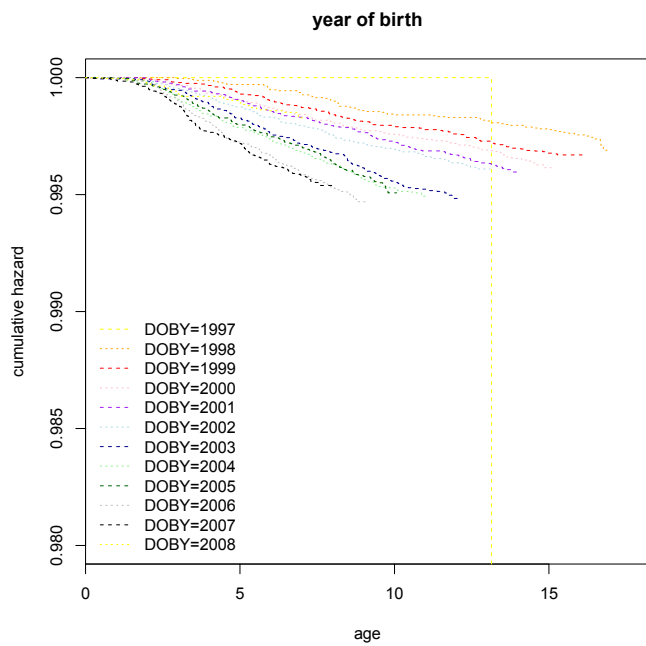

maternal age quantile

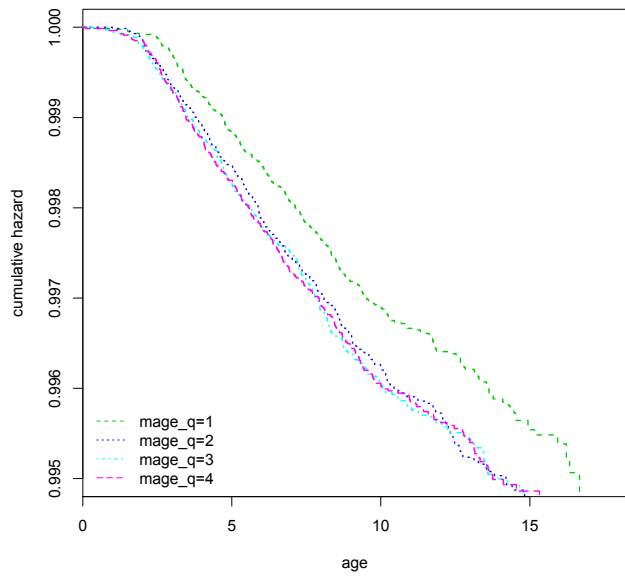

paternal age quantile

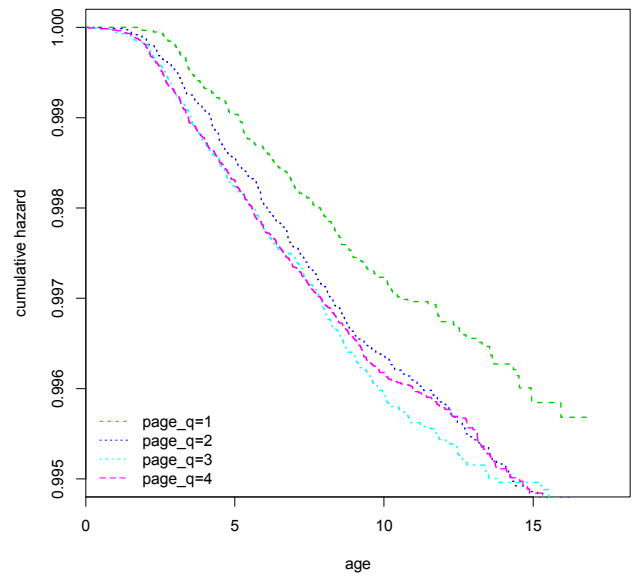

maternal anxiety disorders

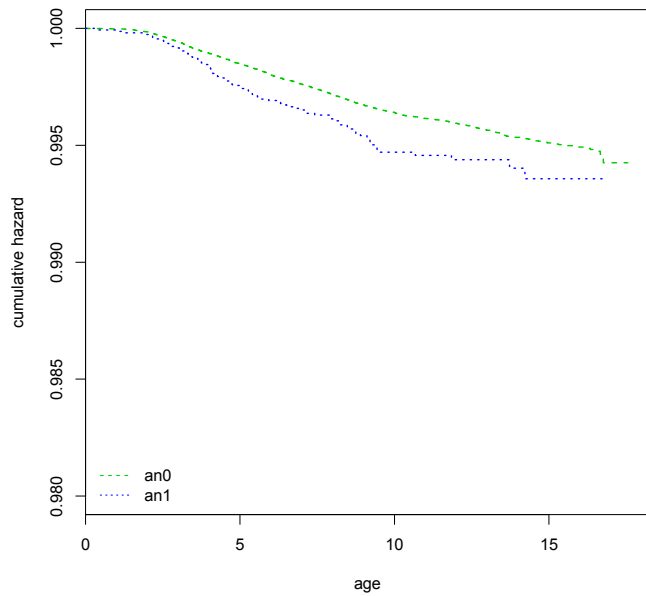

maternal affective disorders

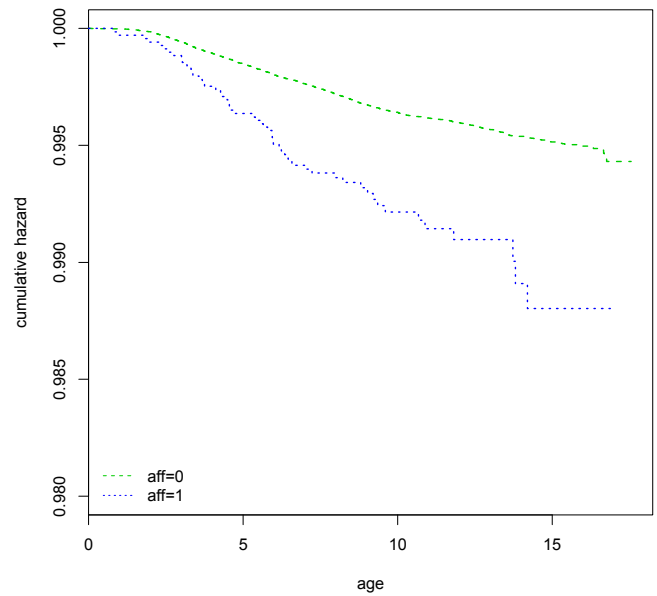

maternal non-affective psychotic disorders

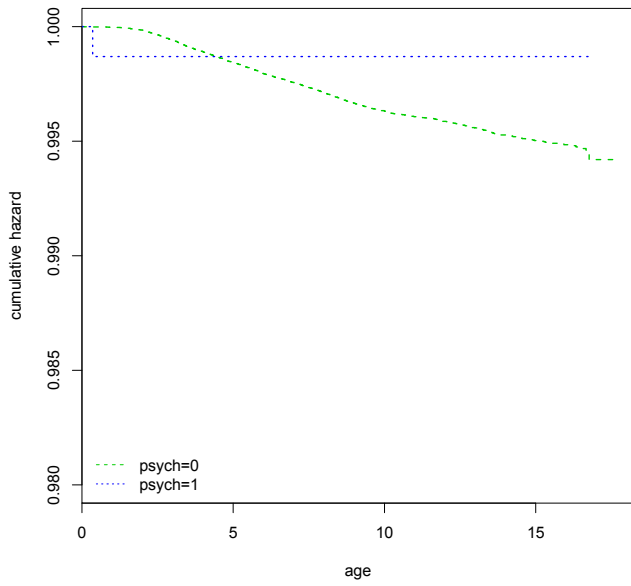

maternal neurological disorders

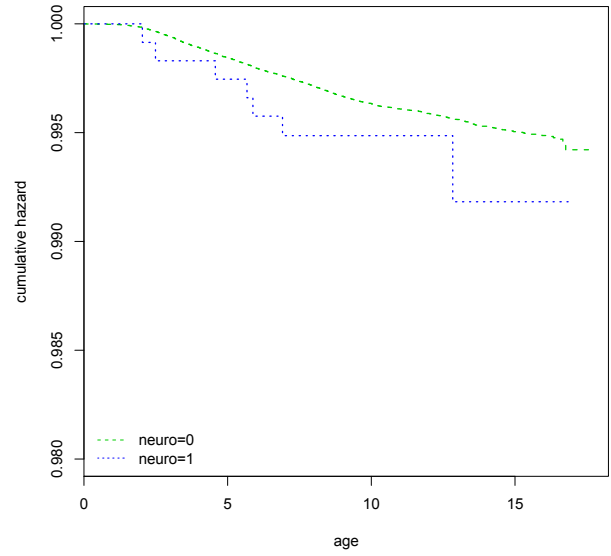

Adrenergic receptor alpha 1A agonist

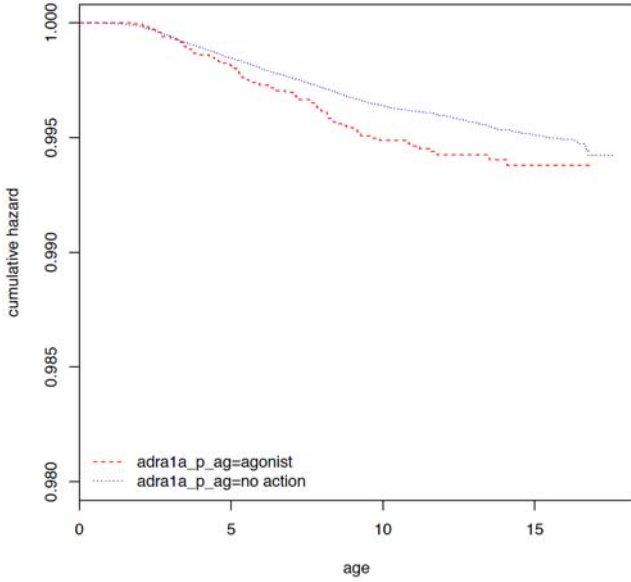

Adrenergic receptor alpha 1A antagonist exposure

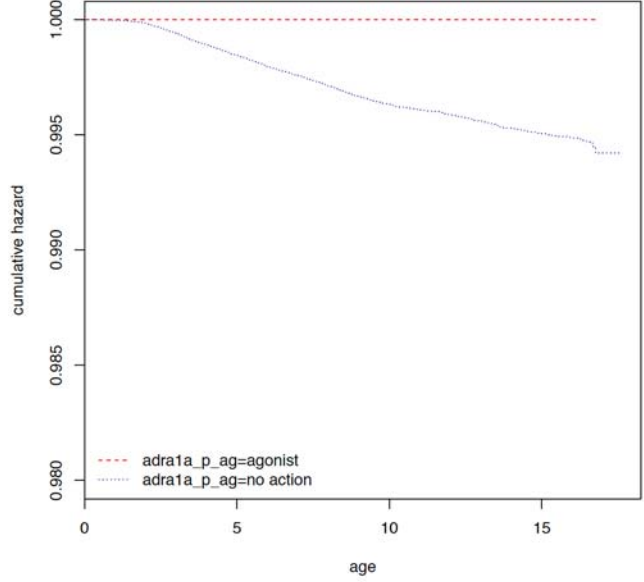



**Adrenergic receptor alpha 1B agonist**

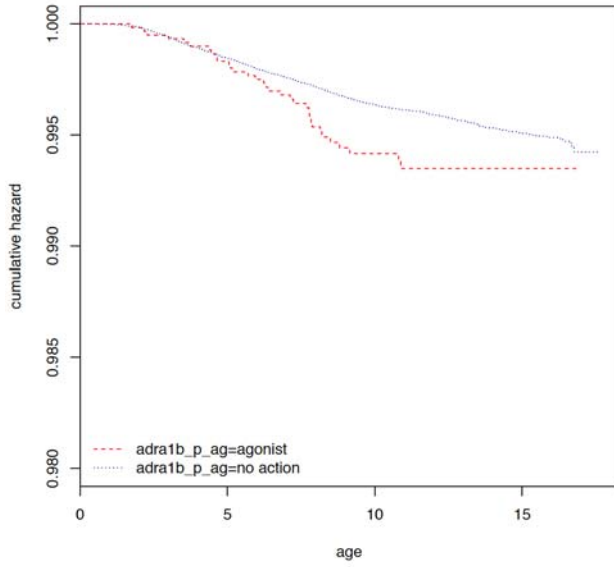

**Adrenergic receptor alpha 1B antagonist exposure**

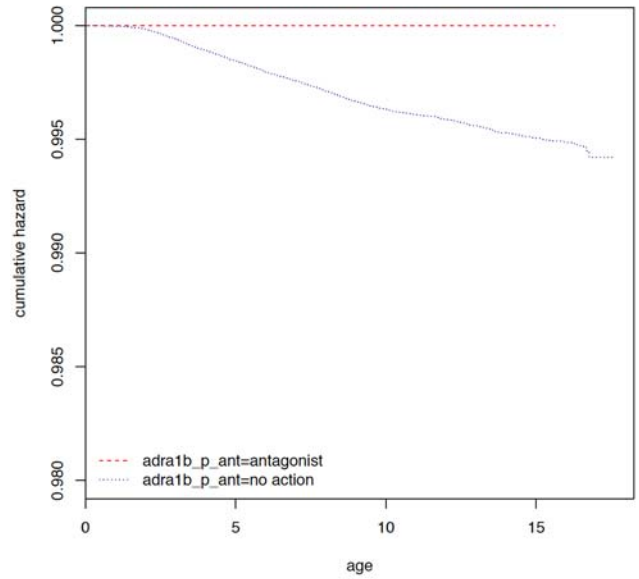

**Adrenergic receptor alpha 1D agonist exposure**

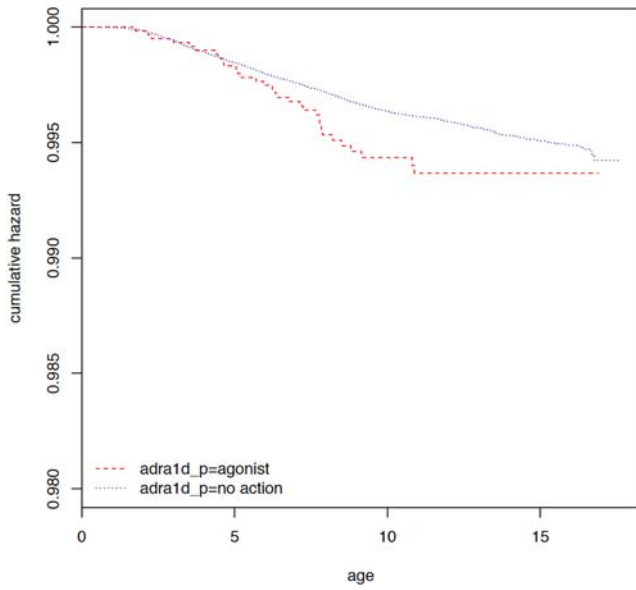

**Adrenergic receptor alpha 2B agonist exposure**

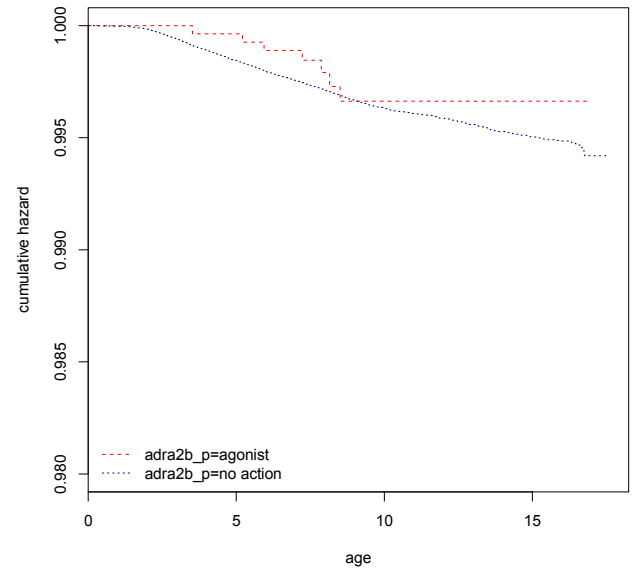

**Adrenergic receptor alpha 2A agonist exposure**

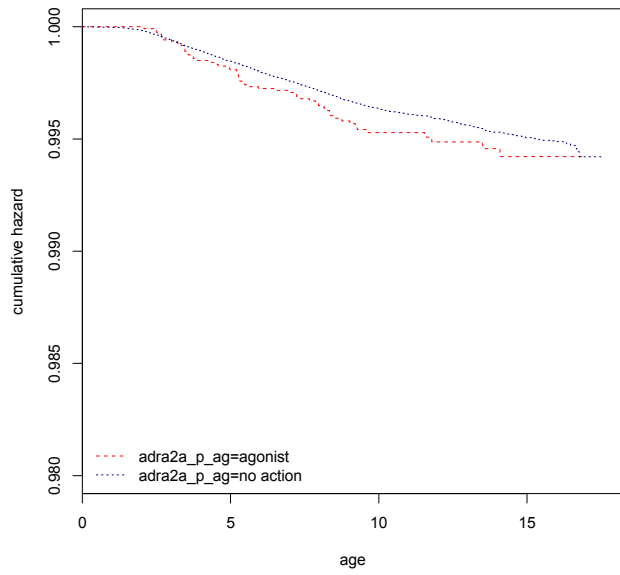

**Adrenergic receptor alpha 2A antagonist exposure**

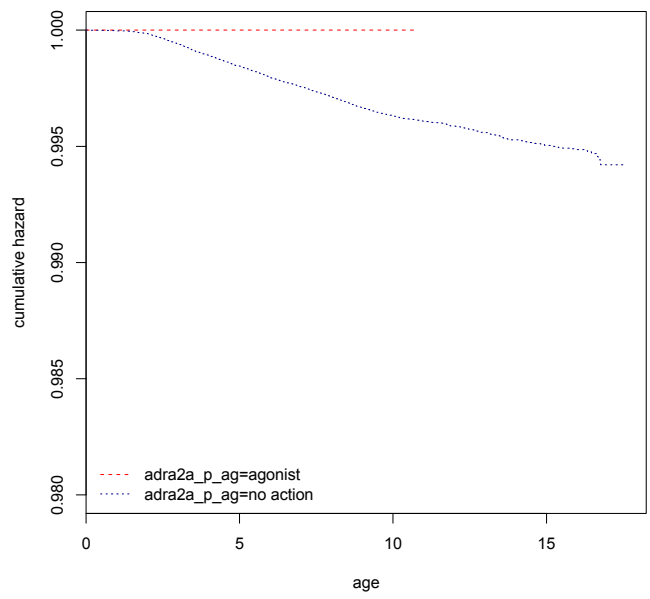

**Adrenergic receptor beta 1 agonist exposure**

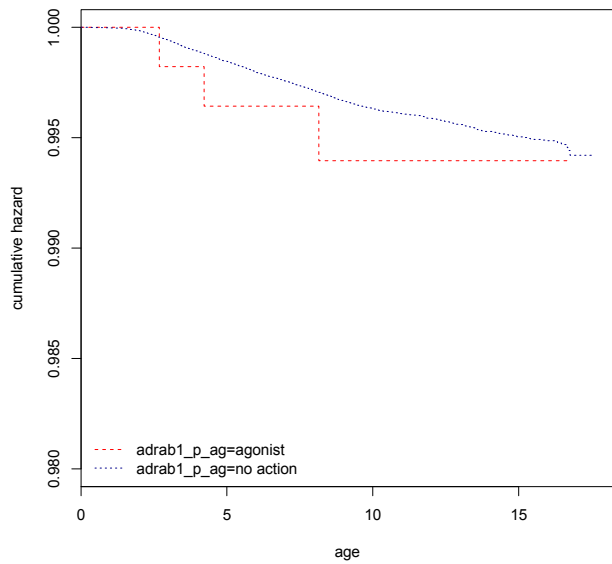

**Adrenergic receptor beta 1 antagonist exposure**

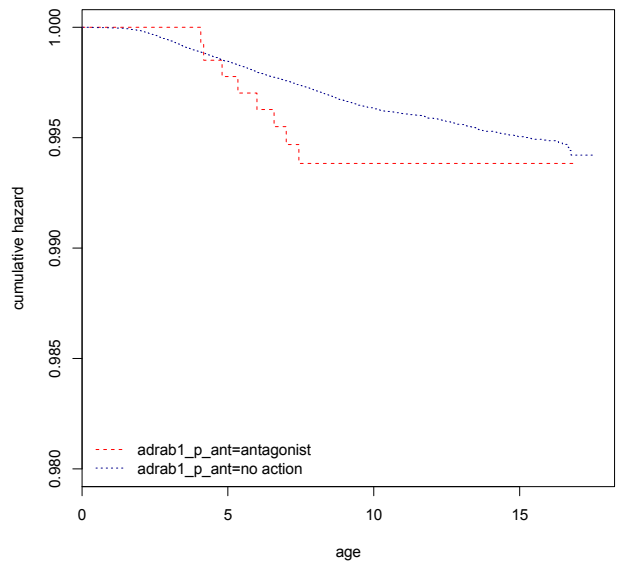

Adrenergic receptor beta 2 agonist exposure

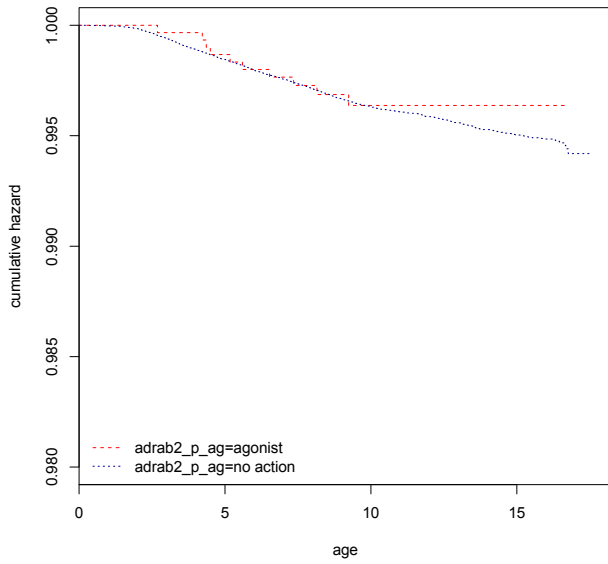

Adrenergic receptor beta 2 antagonist exposure

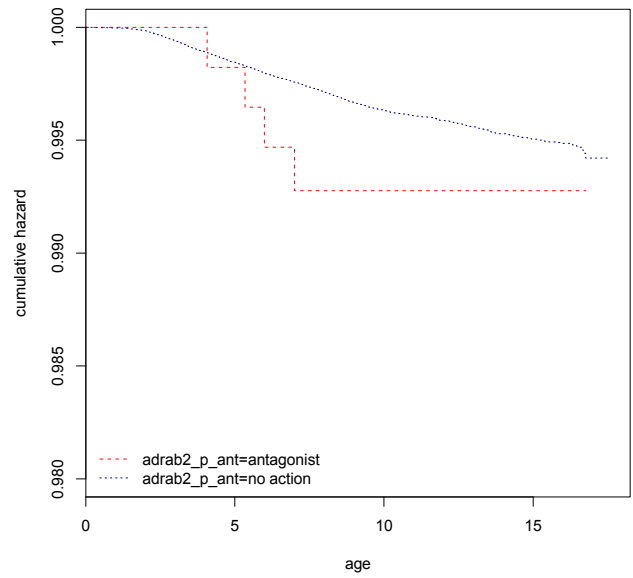

adenosine receptor 1 antagonist exposure

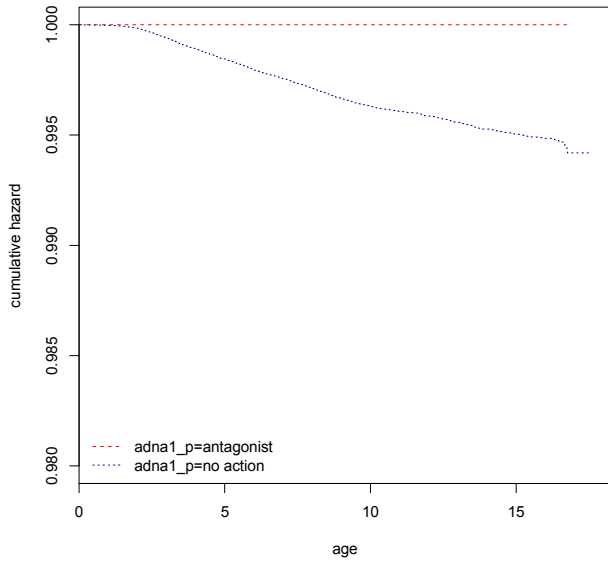

adenosine receptor 2A antagonist exposure

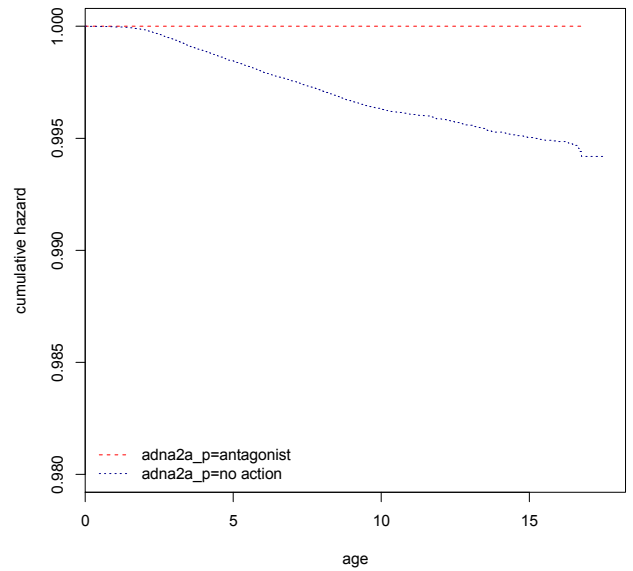

adenosine receptor 2B antagonist exposure

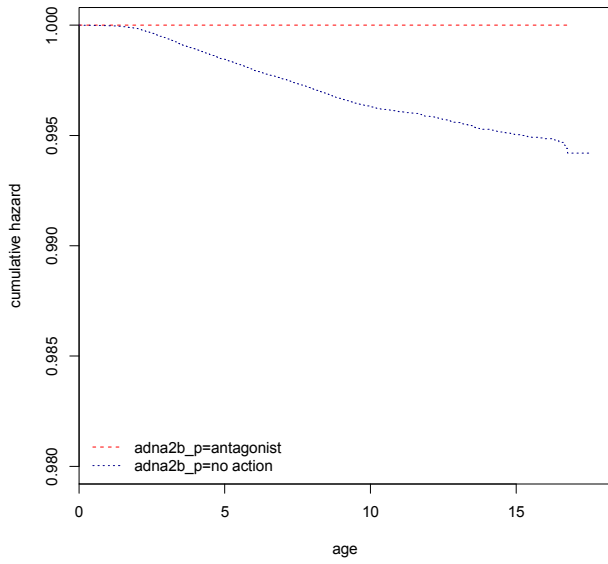

opioid mu agonist exposure

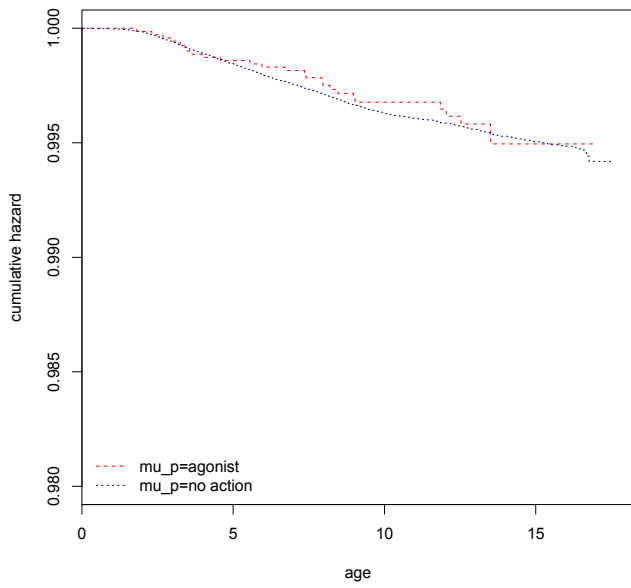

kappa exposure

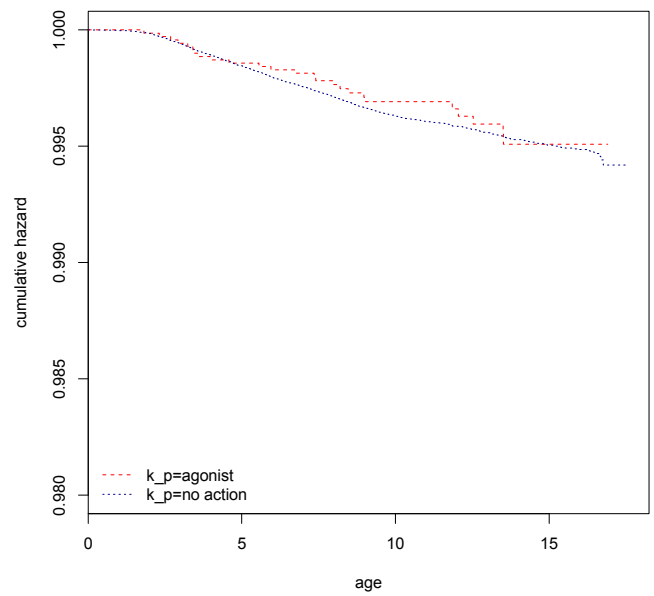

endocannabinoid receptor 1/2 agonist exposure

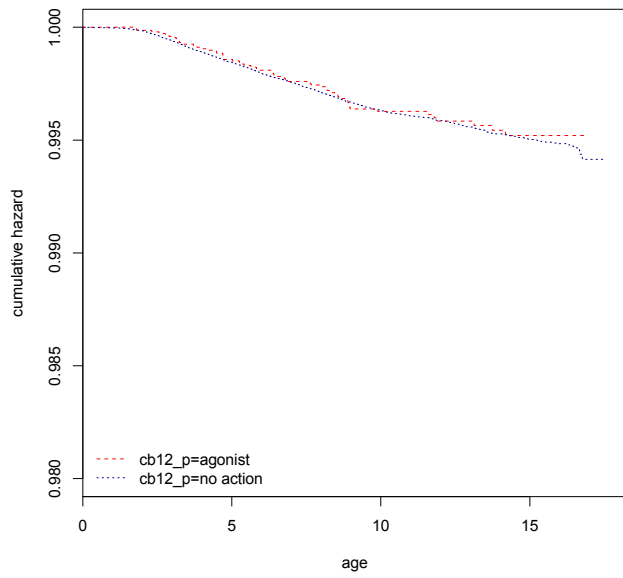

VAT inhibitor exposure

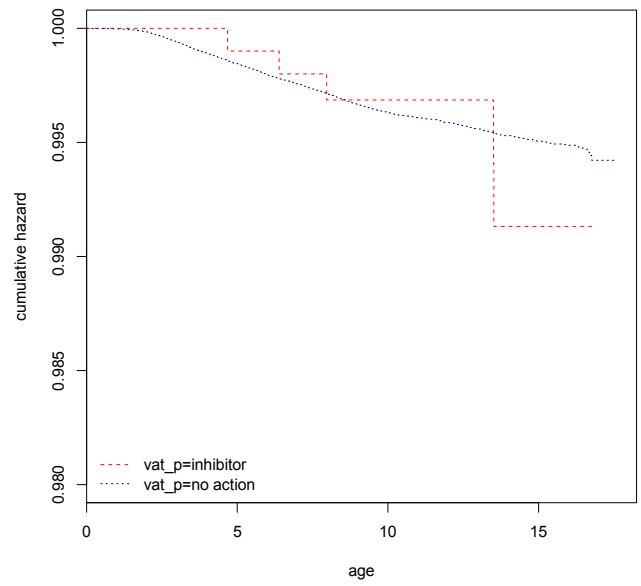

DA re-uptake inhibitor exposure

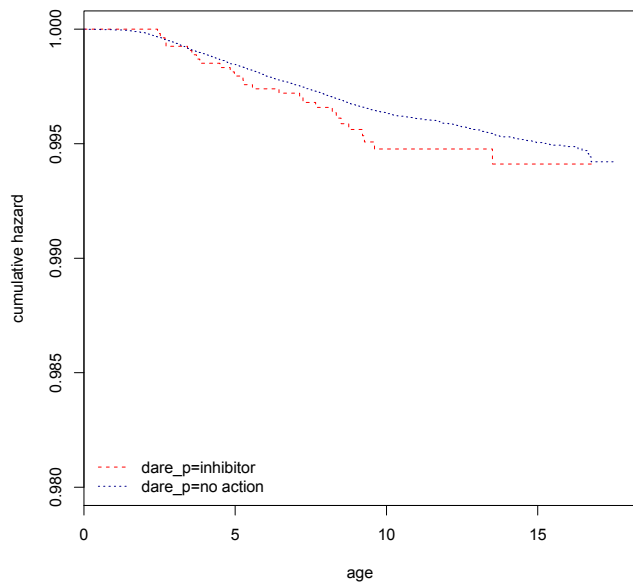

NA re-uptake inhibitor exposure

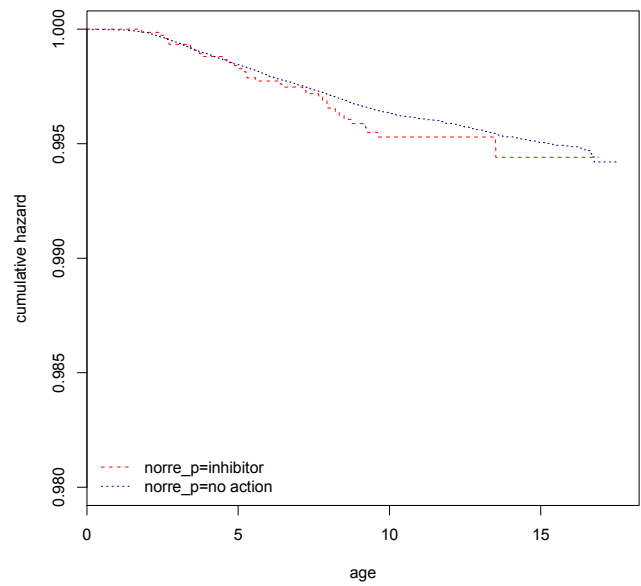

5-HT re-uptake inhibitor exposure

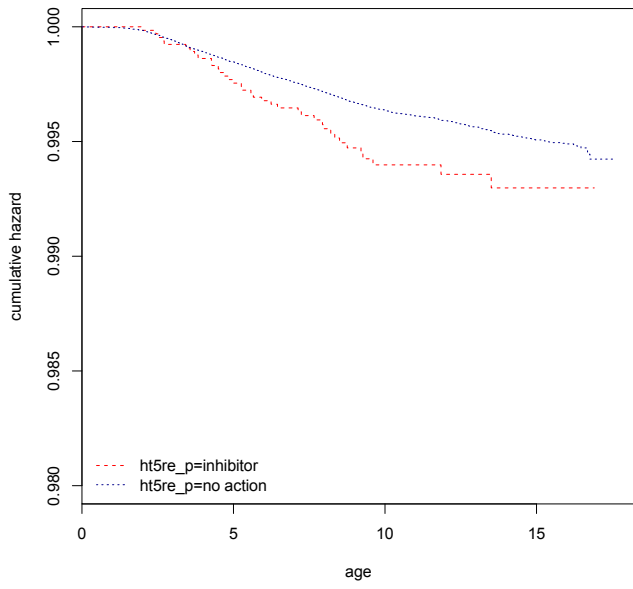

GABA re-uptake inhibitor exposure

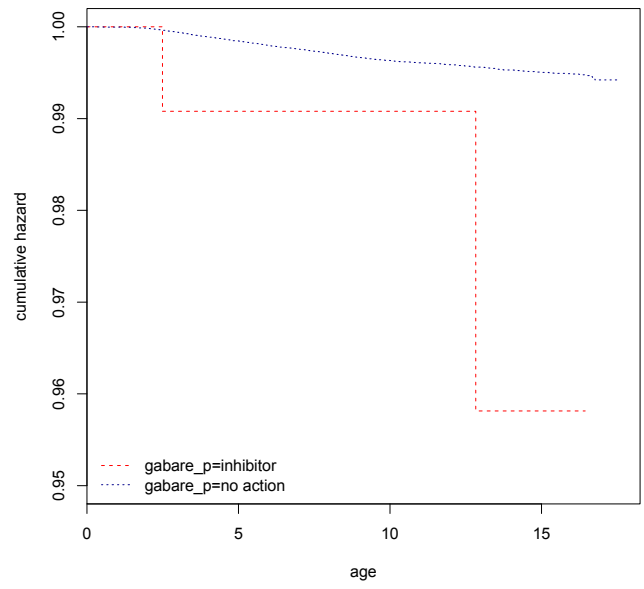

NMDA 1 / 2A / 3B receptor antagonist exposure

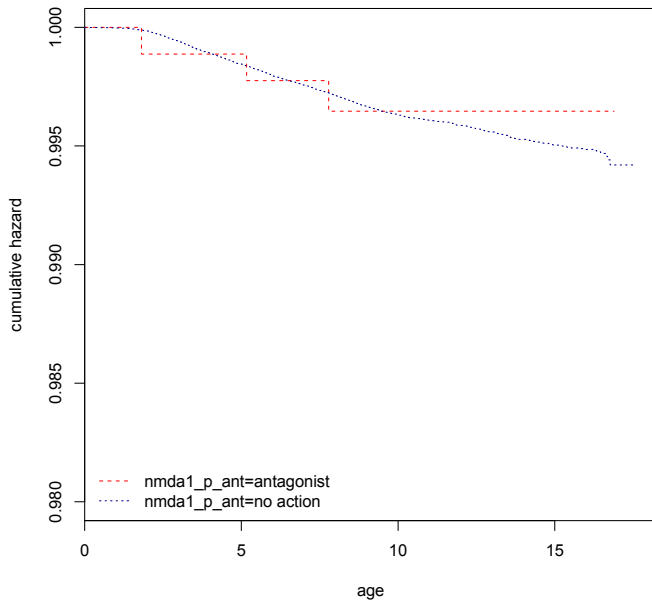

NMDA 3A receptor antagonist exposure

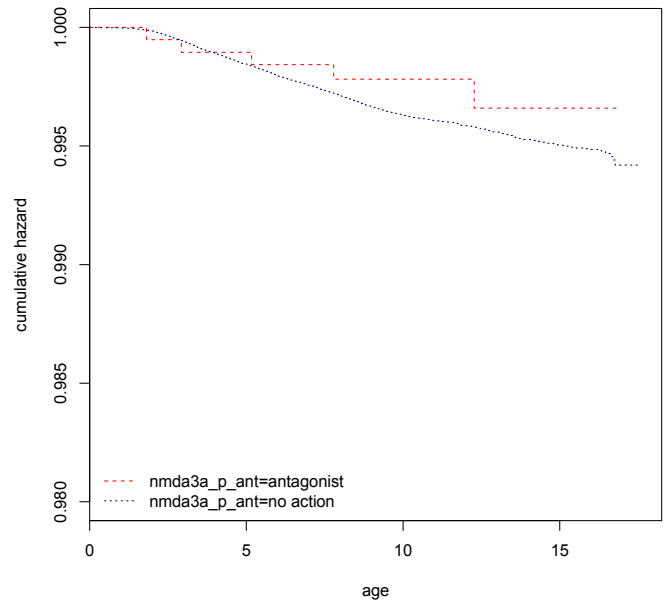

glutamate receptor 3 agonist exposure

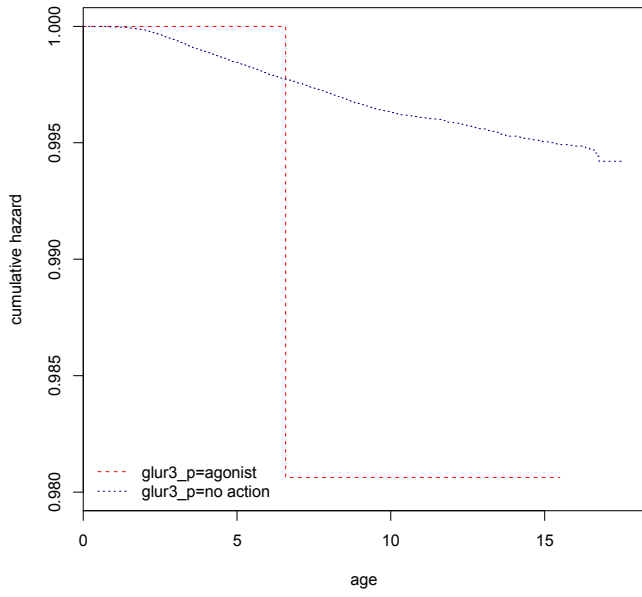

GABA-A receptor agonist exposure

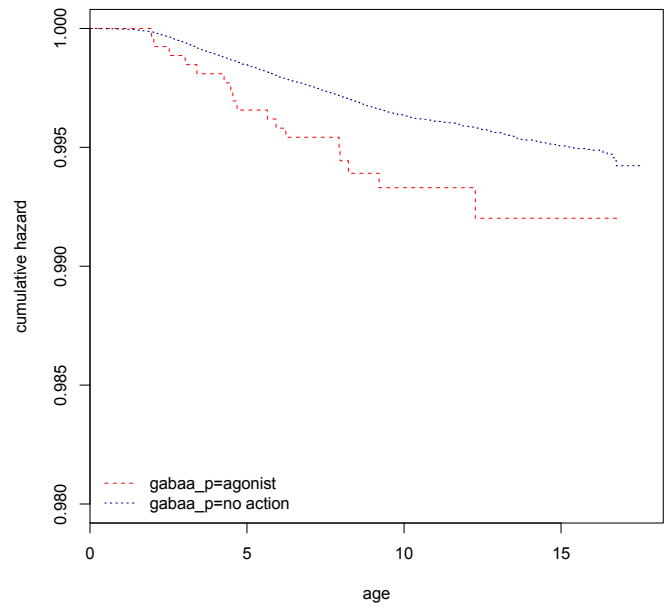

muscarinic receptor 1 agonist exposure

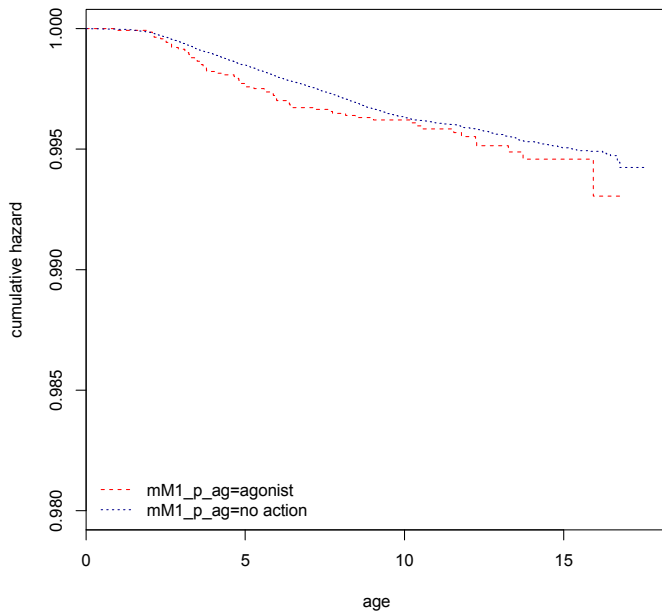

muscarinic receptor 1 antagonist exposure

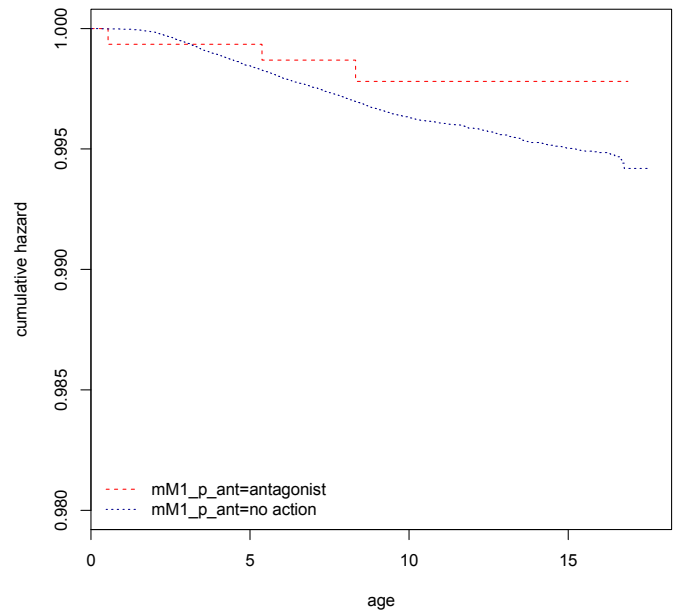

muscarinic receptor 2 antagonist exposure

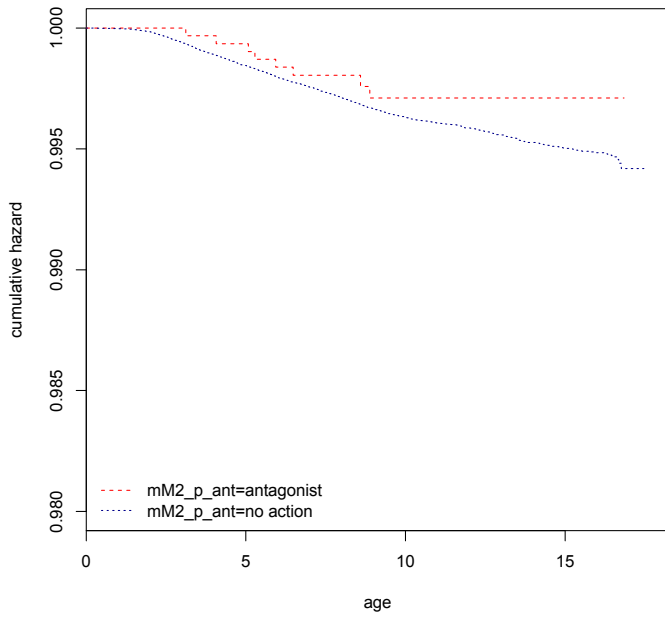

muscarinic receptor 3 antagonist exposure

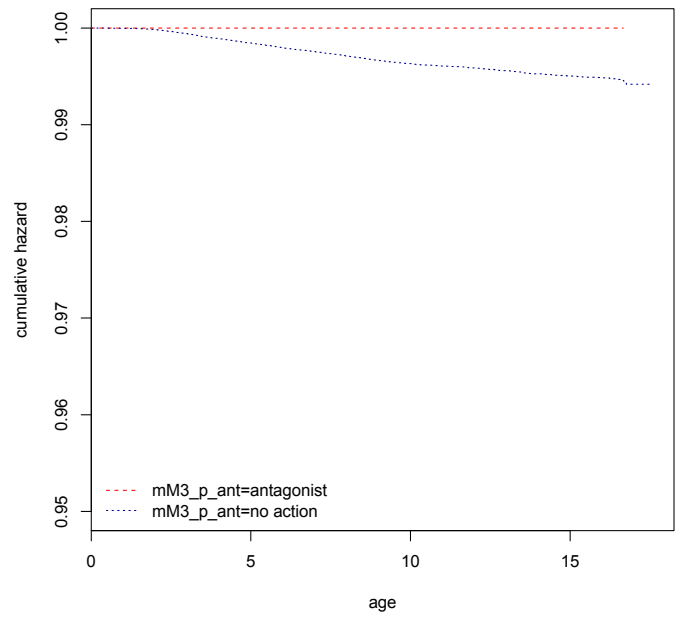

muscarinic receptor 4 antagonist exposure

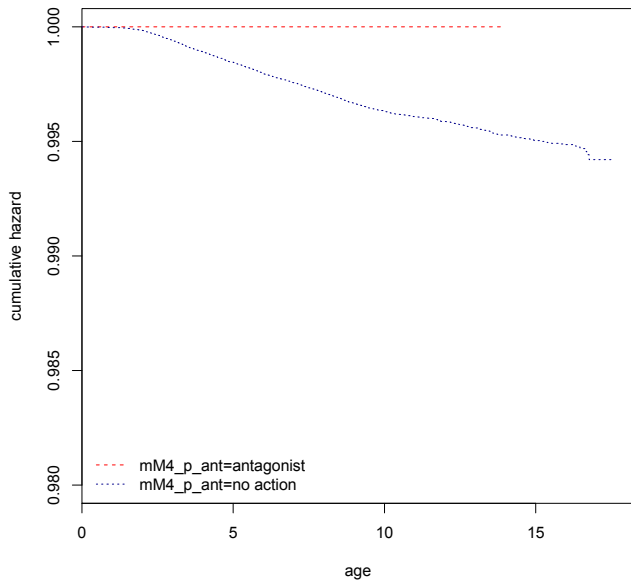

acetylcholine nicotinic receptor antagonist

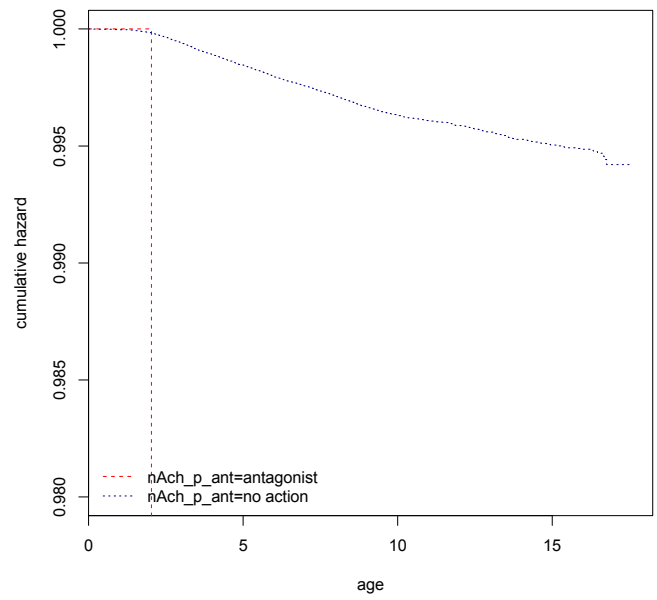



histamine receptor 1 agonist exposure

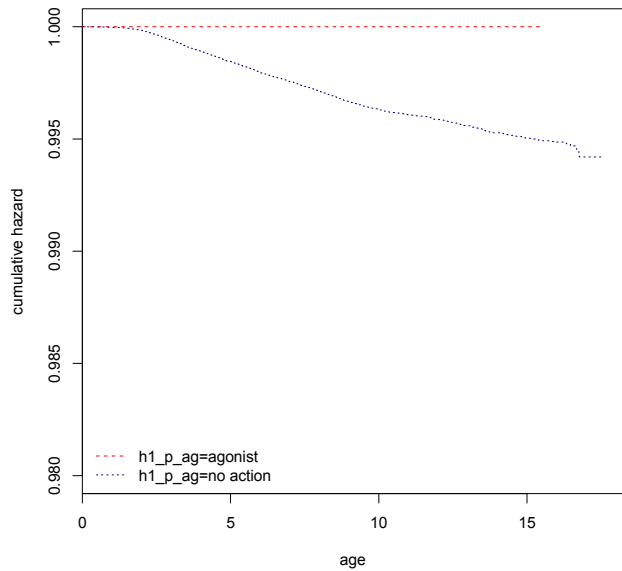

histamine receptor 1 antagonist exposure

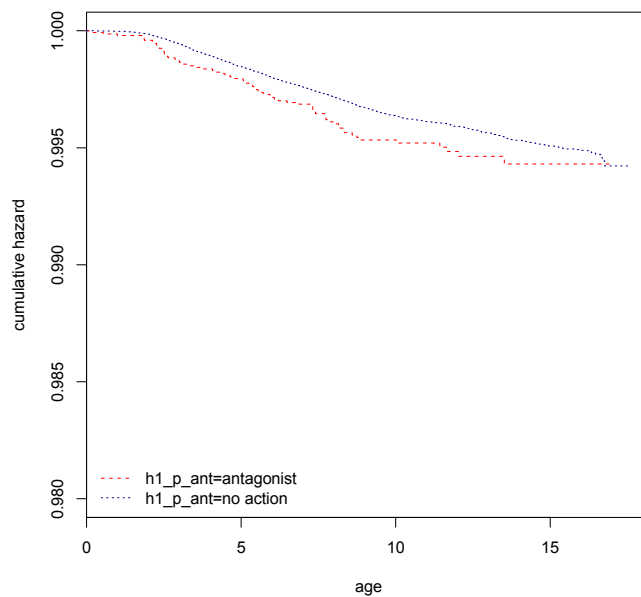

histamine receptor 2 antagonist exposure

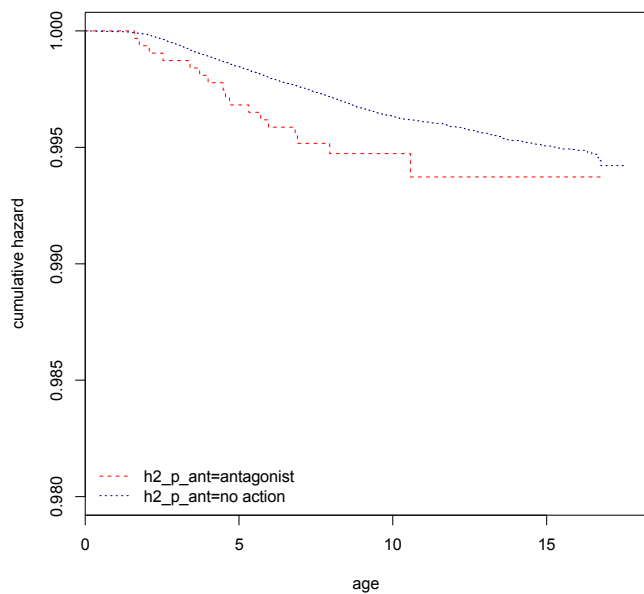

histamine receptor 3 antagonist exposure

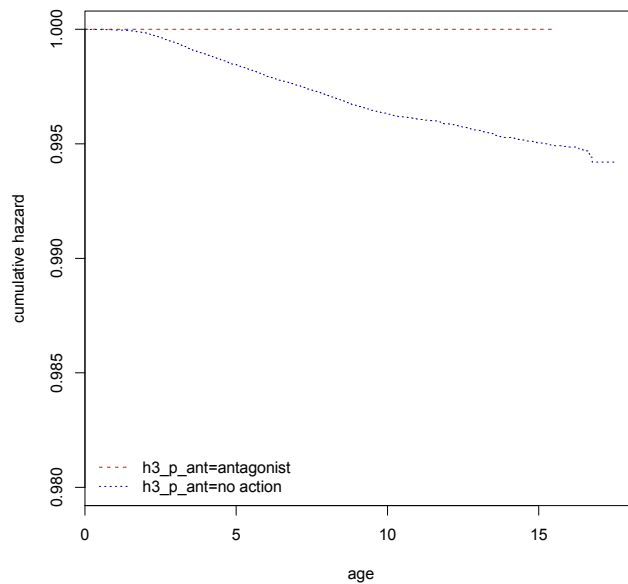

dopamine receptor 1 antagonist exposure

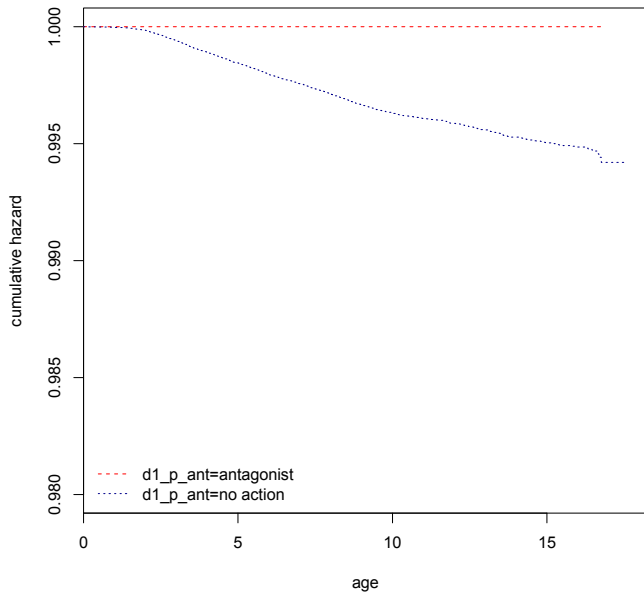

dopamine receptor 2 agonist exposure

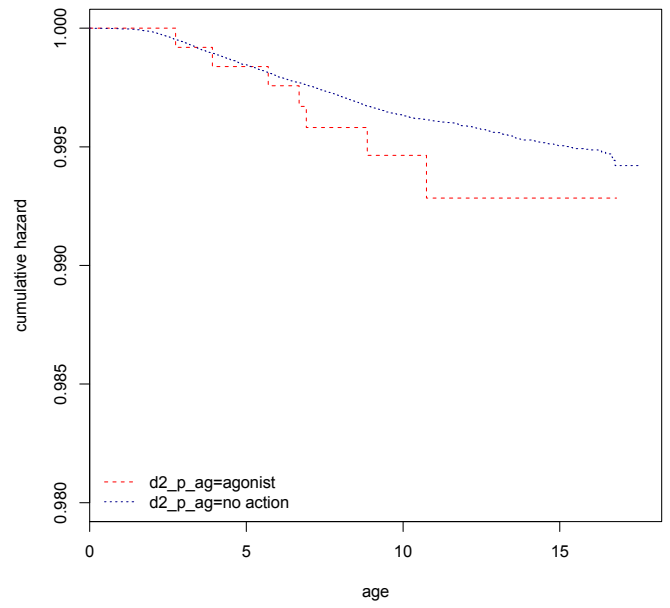

dopamine receptor 3 agonist exposure

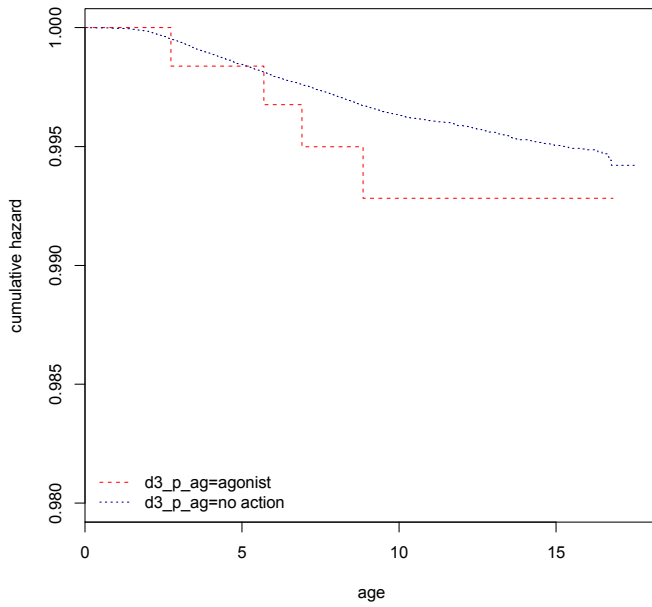

dopamine receptor 2 antagonist exposure

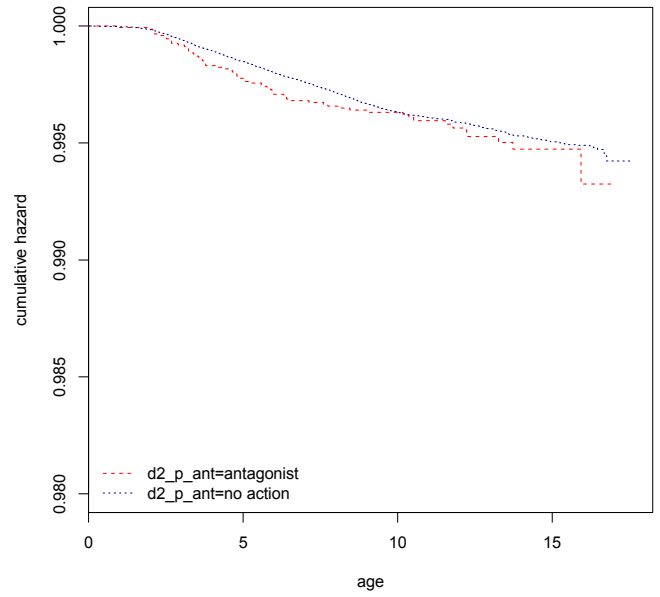

**dopamine receptor 3 antagonist exposure**

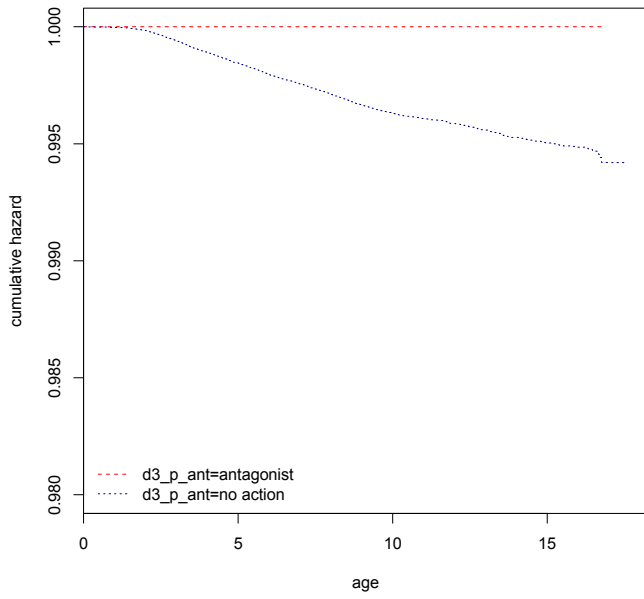

**5-HT receptor 1A agonist exposure**

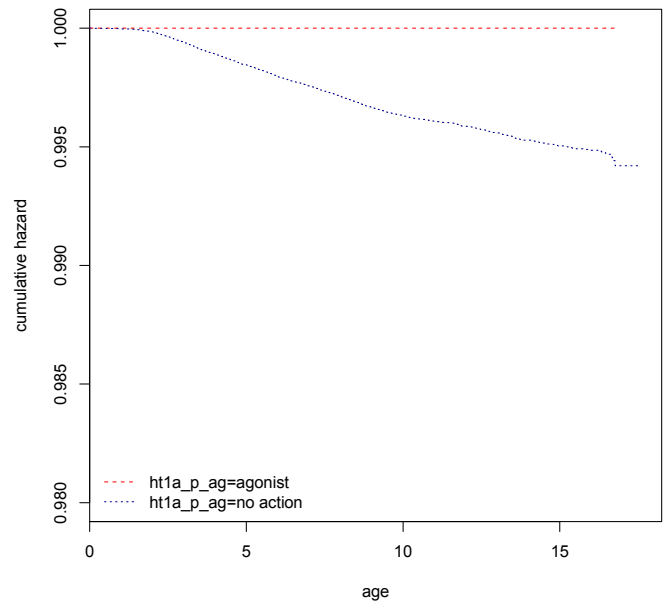

**5-HT receptor 1B / 1D agonist exposure**

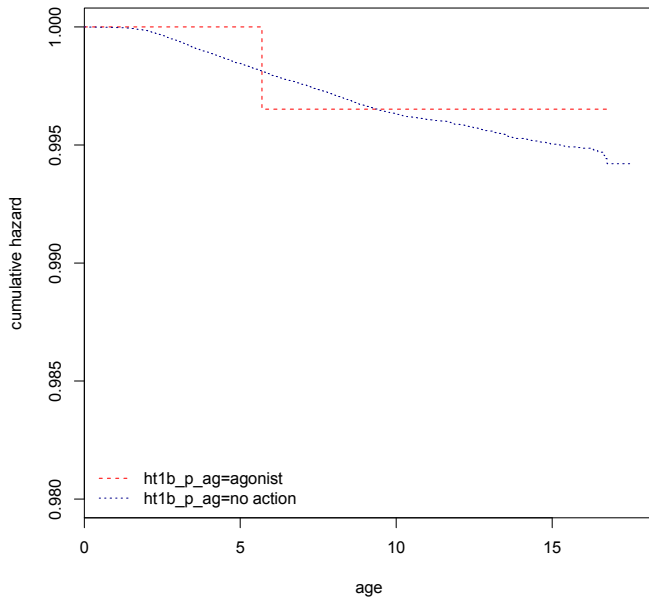

**5-HT receptor 1A antagonist exposure**

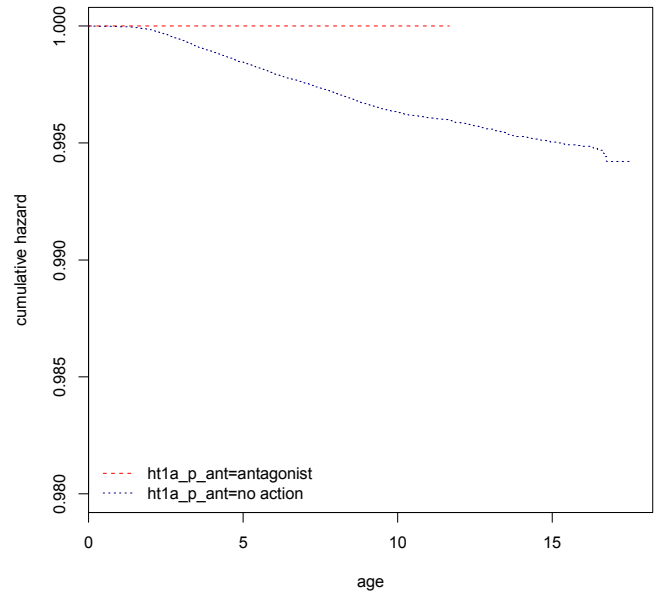

5-HT receptor 1F agonist exposure

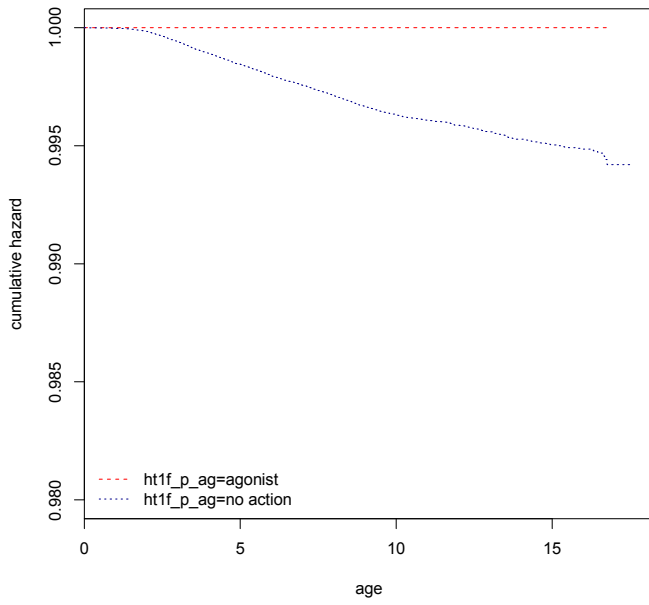

5-HT receptor 2A antagonist exposure

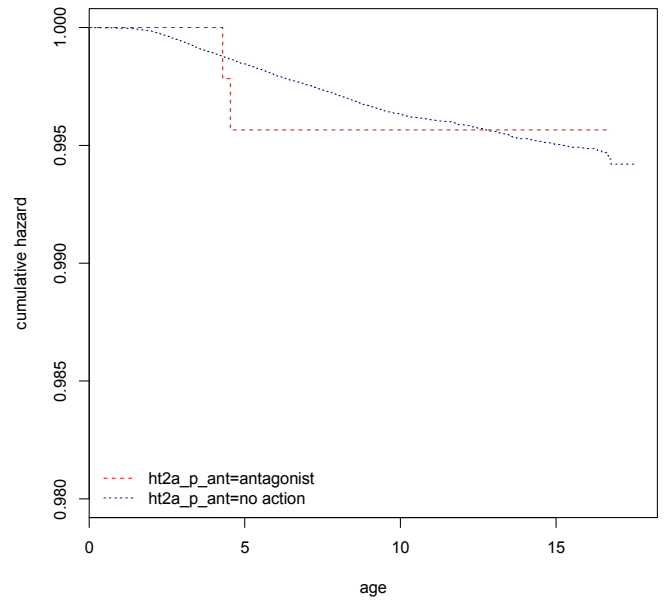

5-HT receptor 2B antagonist exposure

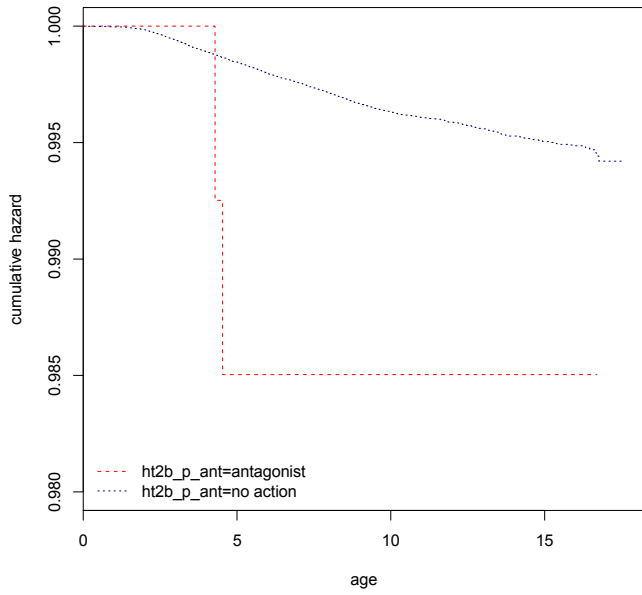

5-HT receptor 3A antagonist exposure

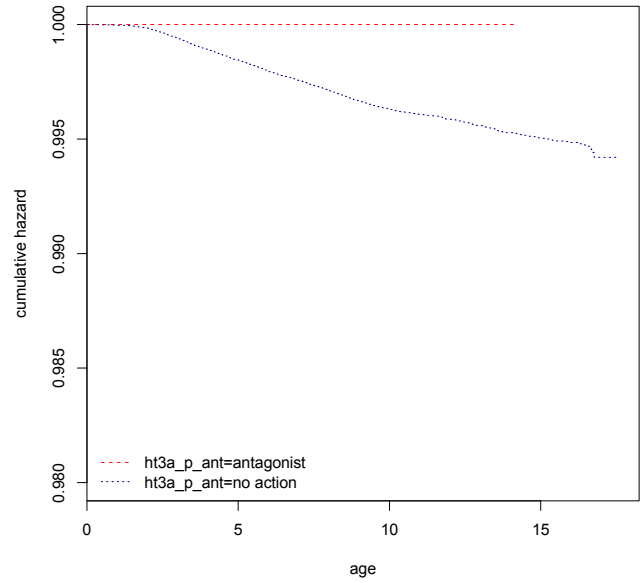

**eFigure 14. ASD Rates in the Subcohort in Relation to the Number of Maternal Diagnoses Between Year Before Pregnancy Start and Child's Date of Birth**

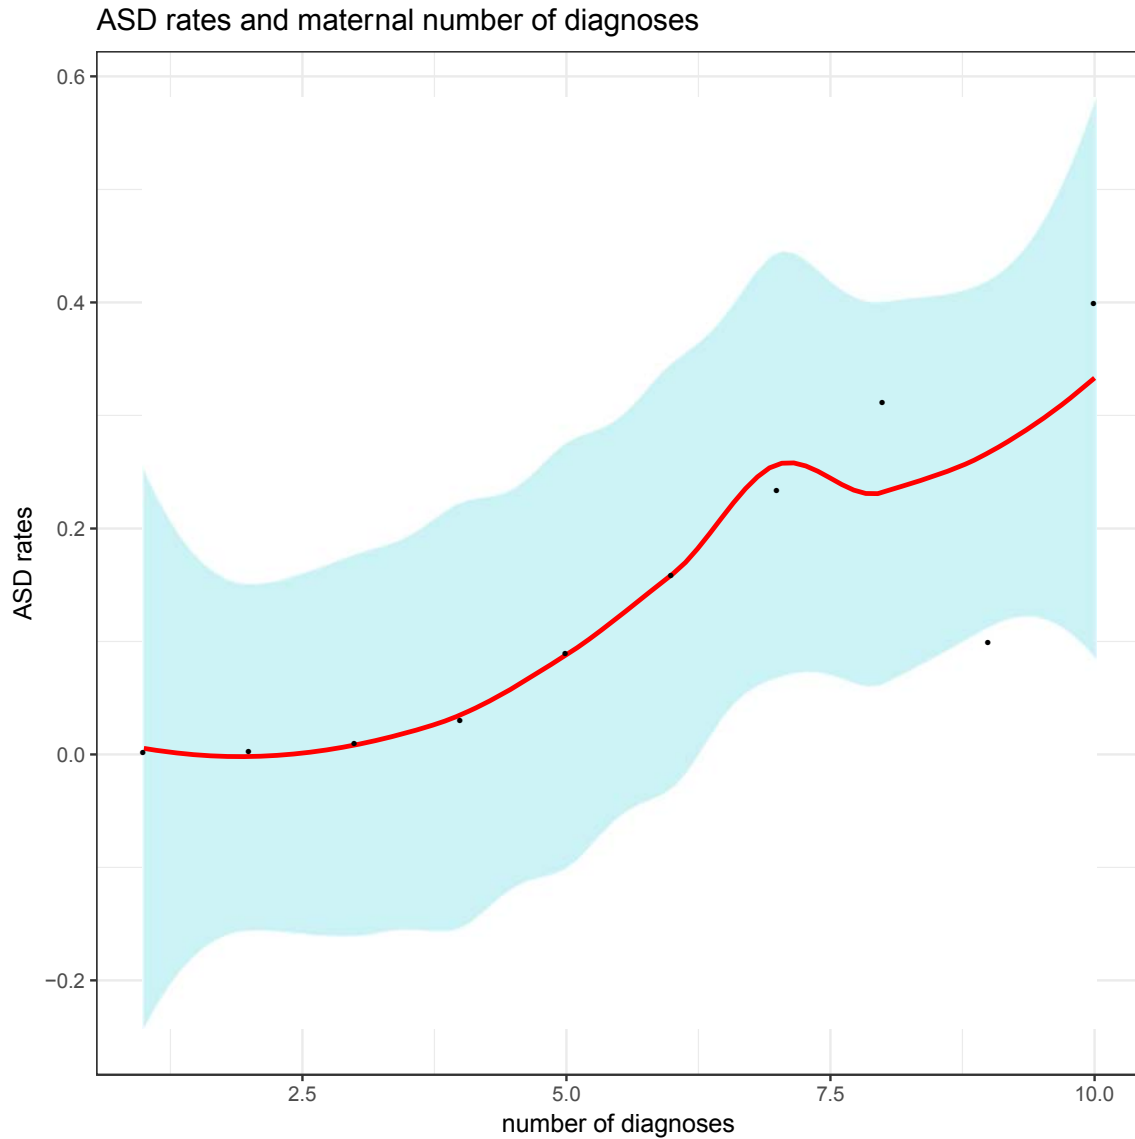

The y-axis represents the number of ASD cases per 100 individuals. The x-axis represents the number of diagnoses mother received before and during the pregnancy, divided by 10 and rounded up to the nearest 10 (e.g. point at 2 on the x axis indicated the mean ASD rates in women who received between 11 and 20 diagnoses).

**eTable 1. Comparison of Prescription Rates in Israeli Meuhedet Data and Swedish National Register**

| <b>DIABETES</b>            |                    |                  |                |                  |                |
|----------------------------|--------------------|------------------|----------------|------------------|----------------|
|                            |                    | <b>Sweden</b>    |                | <b>Israel</b>    |                |
|                            |                    | <b>frequency</b> | <b>percent</b> | <b>frequency</b> | <b>percent</b> |
| <b>pre-pregnancy</b>       | <b>non-exposed</b> | 100645           | 99.17          | 10856            | 99.26          |
|                            | <b>exposed</b>     | 839              | 0.83           | 81               | 0.74           |
| <b>pregnancy</b>           | <b>non-exposed</b> | 100405           | 98.94          | 12992            | 99.08          |
|                            | <b>exposed</b>     | 1079             | 1.06           | 120              | 0.92           |
| <b>HYPERTENSION</b>        |                    |                  |                |                  |                |
|                            |                    | <b>Sweden</b>    |                | <b>Israel</b>    |                |
|                            |                    | <b>frequency</b> | <b>percent</b> | <b>frequency</b> | <b>percent</b> |
| <b>pre-pregnancy</b>       | <b>non-exposed</b> | 101466           | 99.98          | 10927            | 99.91          |
|                            | <b>exposed</b>     | 18               | 0.02           | 10               | 0.09           |
| <b>pregnancy</b>           | <b>non-exposed</b> | 101432           | 99.95          | 13076            | 99.73          |
|                            | <b>exposed</b>     | 52               | 0.05           | 36               | 0.27           |
| <b>ORAL CONTRACEPTIVES</b> |                    |                  |                |                  |                |
|                            |                    | <b>Sweden</b>    |                | <b>Israel</b>    |                |
|                            |                    | <b>frequency</b> | <b>percent</b> | <b>frequency</b> | <b>percent</b> |
| <b>pre-pregnancy</b>       | <b>non-exposed</b> | 80430            | 79.25          | 9655             | 88.28          |
|                            | <b>exposed</b>     | 21054            | 20.75          | 1282             | 11.72          |
| <b>pregnancy</b>           | <b>non-exposed</b> | 100604           | 99.13          | 13005            | 99.18          |
|                            | <b>exposed</b>     | 880              | 0.87           | 107              | 0.82           |
| <b>ANY ANTIDEPRESSANT</b>  |                    |                  |                |                  |                |
|                            |                    | <b>Sweden</b>    |                | <b>Israel</b>    |                |
|                            |                    | <b>frequency</b> | <b>percent</b> | <b>frequency</b> | <b>percent</b> |
| <b>pre-pregnancy</b>       | <b>non-exposed</b> | 96407            | 95             | 10771            | 98.48          |
|                            | <b>exposed</b>     | 5077             | 5              | 166              | 1.52           |
| <b>pregnancy</b>           | <b>non-exposed</b> | 98867            | 97.42          | 12990            | 99.07          |
|                            | <b>exposed</b>     | 2617             | 2.58           | 122              | 0.93           |
| <b>SSRI</b>                |                    |                  |                |                  |                |
|                            |                    | <b>Sweden</b>    |                | <b>Israel</b>    |                |
|                            |                    | <b>frequency</b> | <b>percent</b> | <b>frequency</b> | <b>percent</b> |
| <b>pre-pregnancy</b>       | <b>non-exposed</b> | 97406            | 95.98          | 10825            | 98.98          |
|                            | <b>exposed</b>     | 4078             | 4.02           | 112              | 1.02           |
| <b>pregnancy</b>           | <b>non-exposed</b> | 99298            | 97.85          | 13015            | 99.26          |
|                            | <b>exposed</b>     | 2186             | 2.15           | 97               | 0.74           |

The exposure windows were standardized to only include individuals for whom the pregnancy period started after July 1 2005, and the date of child's birth was on or before December 31, 2007 in both countries, ensuring comparability of the data. The restrictions were due to availability of Swedish data. Pregnancy period was defined as 280 days prior to the child's date of birth.

**eTable 2. Drug Categories: ATC Codes and Names of the Medications**

|                                                                        | <b>Drug categories - ATC codes</b>                                                                                                                                                                                                                                                                                                                                                                                                                                                        |
|------------------------------------------------------------------------|-------------------------------------------------------------------------------------------------------------------------------------------------------------------------------------------------------------------------------------------------------------------------------------------------------------------------------------------------------------------------------------------------------------------------------------------------------------------------------------------|
| <b>Serotonin re-uptake inhibitors</b>                                  | A08AA10 (sibutramine), N02AX02 (tramadol), N02AX52 (tramadol, combinations), N06AA01 (desipramine), N06AA02 (imipramine), N06AA04 (clomipramine), N06AA06 (trimipramine), N06AA09 (amitriptyline), N06AA10 (nortriptyline), N06AB03 (fluoxetine), N06AB05 (paroxetine), N06AB06 (sertraline), N06AB08 (fluvoxamine), N06AB10 (escitalopram), N06AX05 (trazodone), N06AX17 (milnacipran), N06AX21 (duloxetine), R01BA02 (pseudoephedrine), R01BA52 (pseudoephedrine, combinations)         |
| <b>Serotonin receptor 1A agonists</b>                                  | N02CC01 (sumatriptan), N02CC02 (naratriptan), N02CC03 (zolmitriptan), N05BE01 (buspirone), N06AX05 (trazodone), N02CC06 (eletriptan; migraine), N06AX05 (trazodone)                                                                                                                                                                                                                                                                                                                       |
| <b>Serotonin receptor 1B agonists</b>                                  | N02CC01 (sumatriptan), N02CC02 (naratriptan), N02CC03 (zolmitriptan), N02CC06 (eletriptan), N02CA72 (ergotamine)                                                                                                                                                                                                                                                                                                                                                                          |
| <b>Serotonin receptor 1D agonists</b>                                  | N02CC01 (sumatriptan), N02CC02 (naratriptan), N02CC03 (zolmitriptan), N02CC06 (eletriptan), N02CA72 (ergotamine)                                                                                                                                                                                                                                                                                                                                                                          |
| <b>Serotonin receptor 1F agonists</b>                                  | N02CC01 (sumatriptan; migraine), N02CC02 (naratriptan; migraine), N02CC03 (zolmitriptan; migraine), N02CC06 (eletriptan; migraine)                                                                                                                                                                                                                                                                                                                                                        |
| <b>Serotonin receptor 1A antagonists</b>                               | N05AA01 (chlorpromazine)                                                                                                                                                                                                                                                                                                                                                                                                                                                                  |
| <b>Serotonin receptor 2A antagonists</b>                               | N05AA01 (chlorpromazine), N05AE03 (sertindole), N05AE04 (ziprasidone), N05AF01 (flupentixol), N05AH02 (clozapine), N05AH06 (clotiapine), N05AX08 (risperidone), N05AX12 (aripiprazole), N05AX13 (paliperidone), N06AA01 (desipramine), N06AA04 (clomipramine), N06AA09 (amitriptyline), N06AA10 (nortriptyline), N06AX05 (trazodone), N06AX11 (mirtazapine)                                                                                                                               |
| <b>Serotonin receptor 2B antagonists</b>                               | N06AA04 (clomipramine)                                                                                                                                                                                                                                                                                                                                                                                                                                                                    |
| <b>Serotonin receptor 3A antagonists</b>                               | A03FA02 (cisapride), A04AA01 (ondansetron), A04AA02 (granisetron), A04AA05 (palonosetron), N06AX11 (mirtazapine), N06DX01 (memantine), N07BC02 (methadone)                                                                                                                                                                                                                                                                                                                                |
| <b>GABA transaminase inhibitors</b>                                    | N03AG01 (valproic acid)                                                                                                                                                                                                                                                                                                                                                                                                                                                                   |
| <b>GABA<sub>A</sub> receptor agonists</b>                              | D08AX08 (ethanol), N03AA02 (phenobarbital), N03AA03 (primidone), N03AE01 (clonazepam), N05BA01 (diazepam), N05BA04 (oxazepam), N05BA05 (potassium clorazepate), N05BA06 (lorazepam), N05BA08 (bromazepam), N05BA09 (clobazam), N05BA12 (alprazolam), N05BC01 (meprobamate), N05CD02 (nitrazepam), N05CD03 (flunitrazepam), N05CD09 (brotizolam), N05CF01 (zopiclone), N05CF02 (zolpidem), N05CM09 (Valerianae radix), N06AB03 (fluoxetine), V03AB16 (ethanol)                             |
| <b>Glutamate receptor 3 agonists</b>                                   | N05AN01 (lithium)                                                                                                                                                                                                                                                                                                                                                                                                                                                                         |
| <b>NMDA receptor 1 antagonists</b>                                     | M03BC01 (orphenadrine), M03BC51 (orphenadrine, combinations), N06DX01 (memantine)                                                                                                                                                                                                                                                                                                                                                                                                         |
| <b>NMDA receptor 2D antagonists</b>                                    | M03BC01 (orphenadrine), M03BC51 (orphenadrine, combinations), N06DX01 (memantine)                                                                                                                                                                                                                                                                                                                                                                                                         |
| <b>NMDA receptor 3B antagonists</b>                                    | M03BC01 (orphenadrine), M03BC51 (orphenadrine, combinations), N06DX01 (memantine)                                                                                                                                                                                                                                                                                                                                                                                                         |
| <b>NMDA receptor 3A antagonists</b>                                    | D08AX08 (ethanol), M03BC01 (orphenadrine), M03BC51 (orphenadrine, combinations), N04BB01 (amantadine), N06DX01 (memantine), N07BC02 (methadone), V03AB16 (ethanol), R05DA09 (dextromethorphan)                                                                                                                                                                                                                                                                                            |
| <b>Neuronal acetylcholine receptor <math>\alpha</math> antagonists</b> | N03AA03 (primidone), N04AA02 (biperiden), N07BC02 (methadone), N03AA02 (phenobarbital)                                                                                                                                                                                                                                                                                                                                                                                                    |
| <b>Muscarinic receptor 1 agonist</b>                                   | A03FA01 (metoclopramide), N07AX01 (pilocarpine), S01EB01 (pilocarpine)                                                                                                                                                                                                                                                                                                                                                                                                                    |
| <b>Muscarinic receptor 1 antagonist</b>                                | A03CA02 (clidinium and psycholeptics), A03DA06 (trospium and analgesics), A04AD01 (scopolamine), G04BD04 (oxybutynin), G04BD07 (tolterodine), G04BD09 (trospium), N04AA01 (trihexyphenidyl), N04AA02 (biperiden), N04AA04 (procyclidine), R03BB01 (ipratropium bromide), R03BB04 (tiotropium bromide), R06AE51 (buclizine, combinations), S01FA01 (atropine), S01FA04 (cyclopentolate), A03AA07 (dicycloverine; IBS), R06AA09 (doxylamine), R06AD08 (oxomemazine), G04BD11 (fesoterodine) |
| <b>Muscarinic receptor 2 antagonists</b>                               | A03AA07 (dicycloverine), D04AA13 (dimetindene), G04BD04 (oxybutynin), G04BD07 (tolterodine), N04AA04 (procyclidine), R03BB01 (ipratropium bromide), R06AA52 (diphenhydramine, combinations), R06AB03 (dimetindene), S01FA01 (atropine), A04AD01 (scopolamine), R03BB04 (tiotropium bromide), G04BD11 (fesoterodine)                                                                                                                                                                       |
| <b>Muscarinic receptor 3</b>                                           | G04BD04 (oxybutynin), G04BD07 (tolterodine), G04BD08 (oxybutynin), G04BD11 (fesoterodine),                                                                                                                                                                                                                                                                                                                                                                                                |

© 2018 American Medical Association. All rights reserved.

|                                                               |                                                                                                                                                                                                                                                                                                                                                                                                                                                                                                                                                                           |
|---------------------------------------------------------------|---------------------------------------------------------------------------------------------------------------------------------------------------------------------------------------------------------------------------------------------------------------------------------------------------------------------------------------------------------------------------------------------------------------------------------------------------------------------------------------------------------------------------------------------------------------------------|
| <b>antagonists</b>                                            | N04AA04 (procyclidine), R03BB01 (ipratropium bromide), R03BB04 (tiotropium bromide), S01FA01 (atropine), A04AD01 (scopolamine)                                                                                                                                                                                                                                                                                                                                                                                                                                            |
| <b>Muscarinic receptor 4 antagonists</b>                      | G04BD07 (tolterodine), N04AA04 (procyclidine), S01FA01 (atropine), S01FA06 (tropicamide), G04BD11 (fesoterodine); A04AD01 (scopolamine)                                                                                                                                                                                                                                                                                                                                                                                                                                   |
| <b>Cannabinoid receptor 1/2 agonists</b>                      | N02BE01 (paracetamol), N02BE51 (paracetamol, combinations), N02BE71 (paracetamol, combinations)                                                                                                                                                                                                                                                                                                                                                                                                                                                                           |
| <b>Fatty acid amide hydrolase inhibitors</b>                  | N02BE01 (paracetamol), N02BE51 (paracetamol, combinations), N02BE71 (paracetamol, combinations)                                                                                                                                                                                                                                                                                                                                                                                                                                                                           |
| <b>Opioid <math>\kappa</math> receptor agonists</b>           | A07DA03 (loperamide), A07DA53 (loperamide,, combinations), N02AA01 (morphine), N02AA05 (oxycodone), N02AA55 (oxycodone and naloxone), N02AA59 (codeine comb), N02AA79 (codeine, combinations), N02AB03 (fentanyl), N02AC54 (dextropropoxyphene, combinations), N02AC74 (dextropropoxyphene, combinations), R05DA20 (opium alkaloids,, combinations), R05FA02 (opium derivatives), N02AE01 (buprenorphine)                                                                                                                                                                 |
| <b>Opioid <math>\epsilon</math> receptor agonists</b>         | A07DA03 (loperamide), A07DA53 (loperamide,, combinations), N02AA01 (morphine), N02AA05 (oxycodone), N02AA55 (oxycodone and naloxone), N02AA59 (codeine comb), N02AA79 (codeine, combinations), N02AB03 (fentanyl), N02AC54 (dextropropoxyphene, combinations), N02AC74 (dextropropoxyphene, combinations), R05DA20 (opium alkaloids,, combinations), R05FA02 (opium derivatives), N02AE01 (buprenorphine)                                                                                                                                                                 |
| <b>Opioid <math>\mu</math> receptor agonists</b>              | A07DA03 (loperamide), A07DA53 (loperamide,, combinations), N02AA01 (morphine), N02AA05 (oxycodone), N02AA55 (oxycodone and naloxone), N02AA59 (codeine, combinations), N02AA79 (codeine, combinations), N02AB03 (fentanyl), N02AC54 (dextropropoxyphene, combinations), N02AC74 (dextropropoxyphene, combinations), N02AE01 (buprenorphine), N02AX02 (tramadol), N02AX52 (tramadol, combinations), N07BC02 (methadone), R05DA20 (opium alkaloids,, combinations), R05FA02 (opium derivatives)                                                                             |
| <b>Dopamine transporter inhibitors</b>                        | A08AA10 (sibutramine), N06AX12 (bupropion), N06BA01 (amfetamine), N06BA02 (dexamfetamine), N06BA04 (methylphenidate), N06BA07 (modafinil), R01BA02 (pseudoephedrine), R01BA52 (pseudoephedrine, combinations)                                                                                                                                                                                                                                                                                                                                                             |
| <b>Dopamine receptor 1 antagonists</b>                        | G02AB01 (methylergometrine), N05AA01 (chlorpromazine), N05AA02 (levomepromazine), N05AB02 (fluphenazine), N05AB03 (perphenazine), N05AC01 (periciazine), N05AF01 (flupentixol), N05AF05 (zuclopenthixol)                                                                                                                                                                                                                                                                                                                                                                  |
| <b>Dopamine receptor 2 agonists</b>                           | G02CB01 (bromocriptine), G02CB03 (cabergoline), G02CB04 (quinagolide), N04BA02 (levodopa and decarboxylase inhibitor), N04BA03 (levodopa and decarboxylase inhibitor), N04BB01 (amantadine), N04BC02 (pergolide), N04BC04 (ropinirole), N04BC05 (pramipexole), N04BC06 (cabergoline), N04BC09 (rotigotine), N06DX01 (memantine)                                                                                                                                                                                                                                           |
| <b>Dopamine receptor 2 antagonists</b>                        | A03FA01, A03FA03 (domperidone), N05AA01 (chlorpromazine), N05AA02 (levomepromazine), N05AB02 (fluphenazine), N05AB03 (perphenazine), N05AD01 (haloperidol), N05AE03 (sertindole), N05AE04 (ziprasidone), N05AF01 (flupentixol), N05AF05 (zuclopenthixol), N05AG02 (pimozide), N05AG03 (penfluridol), N05AH02 (clozapine), N05AH06 (clotiapine), N05AL01 (sulpiride), N05AL05 (amisulpride), N05AX08 (risperidone), N05AX12 (aripiprazole), N05AX13 (paliperidone), N05BE01 (buspirone)                                                                                    |
| <b>Dopamine receptor 3 agonists</b>                           | G02CB01 (bromocriptine), N04BA02 (levodopa and decarboxylase inhibitor), N04BA03 (levodopa and decarboxylase inhibitor), N04BC02 (pergolide), N04BC04 (ropinirole), N04BC05 (pramipexole), N04BC09 (rotigotine)                                                                                                                                                                                                                                                                                                                                                           |
| <b>Dopamine receptor 3 antagonists</b>                        | A03FA03 (domperidone), N05AG02 (pimozide), N05AG03 (penfluridol), N05AL01 (sulpiride), N05AL05 (amisulpride), N05AX13 (paliperidone)                                                                                                                                                                                                                                                                                                                                                                                                                                      |
| <b>Noradrenaline transporter inhibitors</b>                   | A08AA10 (sibutramine), M03BC01 (orphenadrine (citrate)), M03BC51 (orphenadrine (citrate)), N02AX02 (tramadol), N02AX52 (tramadol, combinations), N06AA01 (desipramine), N06AA02 (imipramine), N06AA06 (trimipramine), N06AA08 (dibenzepin), N06AA09 (amitriptyline), N06AA10 (nortriptyline), N06AA21 (maprotiline), N06AX03 (mianserin), N06AX12 (bupropion), N06AX17 (milnacipran), N06AX18 (reboxetine), N06AX21 (duloxetine), N06BA02 (dexamfetamine), N06BA09 (atomoxetine), R01BA02 (pseudoephedrine), R01BA52 (pseudoephedrine, combinations), R03CA02 (ephedrine) |
| <b>Adrenergic receptor <math>\alpha</math> 1A agonists</b>    | C01CA24 (epinephrine), G04CA01 (alfuzosin), N02CA72 (ergotamine), R01AA05 (oxymetazoline), R01AA06 (tetrazyoline), R01AA07 (xylometazoline), R01AB02 (naphazoline), R01AB06 (xylometazoline), R01AB07 (oxymetazoline), R01BA02 (pseudoephedrine), R01BA52 (pseudoephedrine, combinations), R01BA53 (phenylephrine), S01GA01 (naphazoline), S01GA02 (tetrazyoline), S01GA05 (phenylephrine), S01GA52 (tetrazyoline, combinations)                                                                                                                                          |
| <b>Adrenergic receptor <math>\alpha</math> 1A antagonists</b> | C01BD07 (dronedarone), C02CA04 (doxazosin), C04AE54 (dihydroergocristine), C04AX02 (phenoxybenzamine), C07AG01 (labetalol), C07AG02 (carvedilol), G04CA02 (tamsulosin), N05AA01 (chlorpromazine), N05AF01 (flupentixol)                                                                                                                                                                                                                                                                                                                                                   |
| <b>Adrenergic receptor <math>\alpha</math> 1B agonists</b>    | C01CA24 (epinephrine), G04CA01 (alfuzosin), N06BA07 (modafinil), R01AA07 (xylometazoline), R01AB06 (xylometazoline), R01BA53 (phenylephrine), N02CA72 (ergotamine)                                                                                                                                                                                                                                                                                                                                                                                                        |



|                                                               |                                                                                                                                                                                                                                                                                                                                                                                                                                                                                                                                                                                                                                                                                                                                                                                                                                                                                              |
|---------------------------------------------------------------|----------------------------------------------------------------------------------------------------------------------------------------------------------------------------------------------------------------------------------------------------------------------------------------------------------------------------------------------------------------------------------------------------------------------------------------------------------------------------------------------------------------------------------------------------------------------------------------------------------------------------------------------------------------------------------------------------------------------------------------------------------------------------------------------------------------------------------------------------------------------------------------------|
| <b>Adrenergic receptor <math>\alpha</math> 1B antagonists</b> | C01BD07 (dronedarone), C02CA04 (doxazosin), C04AX02 (phenoxybenzamine), G04CA02 (tamsulosin), N05AA01 (chlorpromazine)                                                                                                                                                                                                                                                                                                                                                                                                                                                                                                                                                                                                                                                                                                                                                                       |
| <b>Adrenergic receptor <math>\alpha</math> 1D agonists</b>    | G04CA01 (alfuzosin), R01AA07 (xylometazoline), R01AB06 (xylometazoline), R01BA53 (phenylephrine), N02CA72 (ergotamine)                                                                                                                                                                                                                                                                                                                                                                                                                                                                                                                                                                                                                                                                                                                                                                       |
| <b>Adrenergic receptor <math>\alpha</math> 2A agonists</b>    | C01CA24 (epinephrine), C02AC01 (clonidine), N02BG07 (flupirtine), R01AA05 (oxymetazoline), R01AA07 (xylometazoline), R01AB02 (naphazoline), R01AB06 (xylometazoline), R01AB07 (oxymetazoline), R01BA02 (pseudoephedrine), R01BA52 (pseudoephedrine, combinations), S01EA05 (brimonidine), S01GA01 (naphazoline), N05AC01 (periciazine), N06AX03 (mianserin)                                                                                                                                                                                                                                                                                                                                                                                                                                                                                                                                  |
| <b>Adrenergic receptor <math>\alpha</math> 2A antagonists</b> | C04AE54 (dihydroergocristine), C04AX02 (phenoxybenzamine), G04BE04 (yohimbine), N05AC01 (periciazine), N06AX11 (mirtazapine)                                                                                                                                                                                                                                                                                                                                                                                                                                                                                                                                                                                                                                                                                                                                                                 |
| <b>Adrenergic receptor <math>\alpha</math> 2B agonists</b>    | C01CA24 (epinephrine), C02AC01 (clonidine), R01AA07 (xylometazoline), R01AB06 (xylometazoline), S01EA05 (brimonidine)                                                                                                                                                                                                                                                                                                                                                                                                                                                                                                                                                                                                                                                                                                                                                                        |
| <b>Adrenergic receptor <math>\alpha</math> 2C agonists</b>    | C02AC01 (clonidine), R01AA07 (xylometazoline), R01AB06 (xylometazoline), S01EA05 (brimonidine)                                                                                                                                                                                                                                                                                                                                                                                                                                                                                                                                                                                                                                                                                                                                                                                               |
| <b>Adrenergic receptor <math>\beta</math> 1 agonists</b>      | C01CA24 (epinephrine), R01BA51 (phenylpropanolamine), R02AA03 (dichlorobenzyl alcohol), R03CC02 (salbutamol)                                                                                                                                                                                                                                                                                                                                                                                                                                                                                                                                                                                                                                                                                                                                                                                 |
| <b>Adrenergic receptor <math>\beta</math> 1 antagonists</b>   | C07AA05 (propranolol), C07AA07 (sotalol), C07AB02 (metoprolol), C07AB03 (atenolol), C07AB04 (acebutolol), C07AB07 (bisoprolol), C07AG01 (labetalol), C07AG02 (carvedilol), S01ED01 (timolol), S01ED02 (betaxolol), S01ED51 (timolol, combinations)                                                                                                                                                                                                                                                                                                                                                                                                                                                                                                                                                                                                                                           |
| <b>Adrenergic receptor <math>\beta</math> 2 agonists</b>      | C01CA24 (epinephrine), R01BA51 (phenylpropanolamine), R02AA03 (dichlorobenzyl alcohol), R03AC03 (terbutaline), R03AC12 (salmeterol), R03AC13 (formoterol), R03AK06 (salmeterol with fluticasone), R03AK07 (formoterol and budesonide), R03AK10 (vilanterol and fluticasone fluorate), R03CC02 (salbutamol)                                                                                                                                                                                                                                                                                                                                                                                                                                                                                                                                                                                   |
| <b>Adrenergic receptor <math>\beta</math> 2 antagonists</b>   | C07AA05 (propranolol), C07AA07 (sotalol), C07AG01 (labetalol), C07AG02 (carvedilol), S01ED01 (timolol), S01ED51 (timolol, combinations)                                                                                                                                                                                                                                                                                                                                                                                                                                                                                                                                                                                                                                                                                                                                                      |
| <b>Adenosine receptor A1 antagonists</b>                      | N06BC01 (caffeine), R03DA04 (theophylline)                                                                                                                                                                                                                                                                                                                                                                                                                                                                                                                                                                                                                                                                                                                                                                                                                                                   |
| <b>Adenosine receptor A 2A antagonists</b>                    | N06BC01 (caffeine), P01BC02 (mefloquine), R03DA04 (theophylline)                                                                                                                                                                                                                                                                                                                                                                                                                                                                                                                                                                                                                                                                                                                                                                                                                             |
| <b>Adenosine receptor A 2B antagonist</b>                     | R03DA04 (theophylline)                                                                                                                                                                                                                                                                                                                                                                                                                                                                                                                                                                                                                                                                                                                                                                                                                                                                       |
| <b>Histamine receptor 1 antagonists</b>                       | D04AA13 (dimetindene), D04AA22 (isothipendyl), M03BC01 (orphenadrine), M03BC51 (orphenadrine, combinations), N05AA01 (chlorpromazine), N05AH06 (clotiapine), N05BB01 (hydroxyzine), N06AA08 (dibenzepin), N06AA21 (maprotiline), N06AX03 (mianserin), N07CA02 (cinnarizine), R01AC02 (levocabastine), R01AC03 (azelastine), R06AA09 (doxylamine), R06AA52 (diphenhydramine, combinations), R06AB03 (dimetindene), R06AB04 (chlorphenamine), R06AB05 (pheniramine), R06AB54 (chlorphenamine, combinations), R06AD02 (promethazine), R06AD08 (oxomemazine), R06AD52 (promethazine, combinations), R06AE07 (cetirizine), R06AE51 (buclicizine, combinations), R06AX13 (loratadine), R06AX17 (ketotifen), R06AX24 (epinastine), R06AX25 (mizolastine), R06AX26 (fexofenadine), R06AX27 (desloratadine), S01GX02 (levocabastine), S01GX06 (emedastine), S01GX07 (azelastine), S01GX08 (ketotifen) |
| <b>Histamine receptor 1 agonists</b>                          | N07CA01 (betahistene)                                                                                                                                                                                                                                                                                                                                                                                                                                                                                                                                                                                                                                                                                                                                                                                                                                                                        |
| <b>Histamine receptor 2 antagonists</b>                       | A02BA01 (cimetidine), A02BA02 (ranitidine), A02BA03 (famotidine), R06AX24 (epinastine)                                                                                                                                                                                                                                                                                                                                                                                                                                                                                                                                                                                                                                                                                                                                                                                                       |
| <b>Histamine receptor 3 antagonists</b>                       | N07CA01 (betahistene)                                                                                                                                                                                                                                                                                                                                                                                                                                                                                                                                                                                                                                                                                                                                                                                                                                                                        |
| <b>Vesicular amine transporter inhibitors</b>                 | N06BA01 (amfetamine), N06BA02 (dexamfetamine), N07XX06 (tetrabenazine), R03CA02 (ephedrine)                                                                                                                                                                                                                                                                                                                                                                                                                                                                                                                                                                                                                                                                                                                                                                                                  |

eTable 3. Drug Categories: Common Indications

|                                                                        | <b>Drug categories - predominant indications</b>                                                                                                                                                                                         |
|------------------------------------------------------------------------|------------------------------------------------------------------------------------------------------------------------------------------------------------------------------------------------------------------------------------------|
| <b>Serotonin transporter inhibitors</b>                                | Obesity, analgesic, depression, psychosis, anxiety, nasal congestion, stimulant                                                                                                                                                          |
| <b>Serotonin receptor 1A agonists</b>                                  | Migraine                                                                                                                                                                                                                                 |
| <b>Serotonin receptor 1B agonists</b>                                  | Migraine                                                                                                                                                                                                                                 |
| <b>Serotonin receptor 1D agonists</b>                                  | Migraine                                                                                                                                                                                                                                 |
| <b>Serotonin receptor 1F agonists</b>                                  | Migraine                                                                                                                                                                                                                                 |
| <b>Serotonin receptor 1A antagonists</b>                               | Psychosis                                                                                                                                                                                                                                |
| <b>Serotonin receptor 2A antagonists</b>                               | Psychosis, depression                                                                                                                                                                                                                    |
| <b>Serotonin receptor 2B antagonists</b>                               | Depression                                                                                                                                                                                                                               |
| <b>Serotonin receptor 3A antagonists</b>                               | Reflux disease, nausea, depression, dementia, opioid dependency                                                                                                                                                                          |
| <b>GABA transaminase inhibitors</b>                                    | epilepsy, bipolar disorder                                                                                                                                                                                                               |
| <b>GABA<sub>A</sub> receptor agonists</b>                              | Seizures, anxiety, alcohol withdrawal, insomnia                                                                                                                                                                                          |
| <b>Glutamate receptor 3 agonists</b>                                   | Bipolar disorder, mania                                                                                                                                                                                                                  |
| <b>NMDA receptor 1 antagonists</b>                                     | Parkinson's disease, dementia                                                                                                                                                                                                            |
| <b>NMDA receptor 2D antagonists</b>                                    | Parkinson's disease, dementia                                                                                                                                                                                                            |
| <b>NMDA receptor 3B antagonists</b>                                    | Parkinson's disease, dementia                                                                                                                                                                                                            |
| <b>NMDA receptor 3A antagonists</b>                                    | Parkinson's disease, parkinsonism, dementia, opioid dependence, analgesic, cough                                                                                                                                                         |
| <b>Neuronal acetylcholine receptor <math>\alpha</math> antagonists</b> | Seizures, parkinsonism, extrapyramidal symptoms, opioid dependence                                                                                                                                                                       |
| <b>Muscarinic receptor 1 agonists</b>                                  | Reflux disease, glaucoma                                                                                                                                                                                                                 |
| <b>Muscarinic receptor 1 antagonists</b>                               | Irritable Bowel Syndrome, ulcer disease, urinary incontinence and discomfort, nausea, extrapyramidal symptoms, parkinsonism, obstructive pulmonary disease, nerve agent poisoning, anterior uveitis, rhinitis, cough, overactive bladder |
| <b>Muscarinic receptor 2 antagonists</b>                               | Irritable Bowel Syndrome, allergic reactions, urinary incontinence, parkinsonism, extrapyramidal symptoms, obstructive pulmonary disease, nerve agent poisoning, nausea, overactive bladder                                              |
| <b>Muscarinic receptor 3 antagonists</b>                               | Urinary incontinence, overactive bladder, parkinsonism, extrapyramidal symptoms, obstructive pulmonary disease, nerve agent poisoning, nausea                                                                                            |
| <b>Muscarinic receptor 4 antagonists</b>                               | Urinary incontinence, parkinsonism, extrapyramidal symptoms, ulcers, nerve agent poisoning, mydriasis, overactive bladder, motion sickness                                                                                               |
| <b>Cannabinoid receptor 1/2 agonists</b>                               | Analgesic                                                                                                                                                                                                                                |
| <b>Fatty acid amide hydrolase inhibitors</b>                           | Analgesic                                                                                                                                                                                                                                |
| <b>Opioid <math>\mu</math> receptor agonists</b>                       | Analgesic, diarrhea, opioid dependence                                                                                                                                                                                                   |
| <b>Opioid <math>\kappa</math> receptor agonists</b>                    | Analgesic, diarrhea, opioid dependence                                                                                                                                                                                                   |
| <b>Opioid <math>\epsilon</math> receptor agonists</b>                  | Analgesic, diarrhea, opioid dependence                                                                                                                                                                                                   |
| <b>Dopamine transporter inhibitors</b>                                 | obesity, depression, narcolepsy, ADHD, nasal congestion, stimulant                                                                                                                                                                       |
| <b>Dopamine receptor 1 antagonists</b>                                 | Psychosis, excessive bleeding after childbirth                                                                                                                                                                                           |
| <b>Dopamine receptor 2 agonists</b>                                    | Parkinson's disease, hyperprolactemic disorder, parkinsonism, dementia                                                                                                                                                                   |
| <b>Dopamine receptor 2 antagonists</b>                                 | Reflux disease, gastrointestinal symptoms, psychosis, anxiety                                                                                                                                                                            |
| <b>Dopamine receptor 3 agonists</b>                                    | Parkinson's disease, parkinsonism                                                                                                                                                                                                        |
| <b>Dopamine receptor 3 antagonists</b>                                 | Gastrointestinal symptoms, tics, psychosis                                                                                                                                                                                               |
| <b>Noradrenaline transporter inhibitors</b>                            | muscle relaxant, analgesic, obesity, depression, anxiety, ADHD, narcolepsy, nasal congestion, stimulant                                                                                                                                  |
| <b>Adrenergic receptor <math>\alpha</math> 1A agonists</b>             | respiratory problems, hypertension, headache, nasal congestion, ocular problems, stimulant, hypotension                                                                                                                                  |
| <b>Adrenergic receptor <math>\alpha</math> 1A antagonists</b>          | atrial fibrillation, hypertension, dementia, angina, bladder obstruction, psychosis                                                                                                                                                      |
| <b>Adrenergic receptor <math>\alpha</math> 1B agonists</b>             | respiratory problems, hypertension, ADHD, narcolepsy, nasal congestion, hypotension, headache                                                                                                                                            |
| <b>Adrenergic receptor <math>\alpha</math> 1B antagonists</b>          | atrial fibrillation, hypertension, bladder obstruction, psychosis                                                                                                                                                                        |
| <b>Adrenergic receptor <math>\alpha</math> 1D agonists</b>             | Hypertension, nasal congestion, hypotension, headache                                                                                                                                                                                    |
| <b>Adrenergic receptor <math>\alpha</math> 2A agonists</b>             | respiratory problems, tics, Tourette's syndrome, ADHD, analgesic, nasal congestion, stimulant, rosacea, psychosis, depression                                                                                                            |
| <b>Adrenergic receptor <math>\alpha</math> 2A antagonists</b>          | Dementia, hypertension, mydriasis, psychosis, depression                                                                                                                                                                                 |
| <b>Adrenergic receptor <math>\alpha</math> 2B agonists</b>             | respiratory problems, tics, Tourette's syndrome, ADHD, nasal congestion, rosacea                                                                                                                                                         |
| <b>Adrenergic receptor <math>\alpha</math> 2C agonists</b>             | Tics, Tourette's syndrome, ADHD, nasal stuffiness, rosacea                                                                                                                                                                               |
| <b>Adrenergic receptor <math>\beta</math> 1 agonist</b>                | respiratory problems, nasal congestion                                                                                                                                                                                                   |
| <b>Adrenergic receptor <math>\beta</math> 1 antagonist</b>             | Migraine, atrial fibrillation, angina, anginal pain, hypertension                                                                                                                                                                        |
| <b>Adrenergic receptor <math>\beta</math> 2 agonists</b>               | respiratory problems, nasal congestion                                                                                                                                                                                                   |
| <b>Adrenergic receptor <math>\beta</math> 2 antagonist</b>             | Migraine, atrial fibrillation, angina, anginal pain, hypertension                                                                                                                                                                        |
| <b>Adenosine receptor A 1 antagonists</b>                              | Stimulant, respiratory problems                                                                                                                                                                                                          |
| <b>Adenosine receptor A 2A antagonist</b>                              | Stimulant, respiratory problems, malaria                                                                                                                                                                                                 |
| <b>Adenosine receptor A 2B antagonist</b>                              | Respiratory problems                                                                                                                                                                                                                     |

© 2018 American Medical Association. All rights reserved.

|                                               |                                                                                                                           |
|-----------------------------------------------|---------------------------------------------------------------------------------------------------------------------------|
| <b>Histamine receptor 1 antagonists</b>       | Allergic reactions, Parkinson's disease, psychosis, nausea, anxiety, depression, vertigo, conjunctivitis, rhinitis, cough |
| <b>Histamine receptor 1 agonists</b>          | Vertigo                                                                                                                   |
| <b>Histamine receptor 2 antagonists</b>       | Reflux disease, ulcer disease, conjunctivitis                                                                             |
| <b>Histamine receptor 3 antagonists</b>       | Vertigo                                                                                                                   |
| <b>Vesicular amine transporter inhibitors</b> | ADHD, narcolepsy, tics, Tourette's syndrome, Huntington's disease, nasal congestion, stimulant                            |

eTable 4. Drug Categories: Exposure Numbers by ASD Diagnosis

|                                                      | Drug categories - exposures and ASD |                          |                             |                                |                              |                                 |             |
|------------------------------------------------------|-------------------------------------|--------------------------|-----------------------------|--------------------------------|------------------------------|---------------------------------|-------------|
|                                                      | Total children exposed (n)          | ASD children exposed (n) | ASD in exposed children (%) | Total children non-exposed (n) | ASD children non-exposed (n) | ASD in non-exposed children (%) | Exposed (%) |
| Serotonin transporter inhibitors                     | 1749                                | 37                       | 2.12                        | 94486                          | 1369                         | 1.45                            | 1.817       |
| Serotonin receptor 1A agonists                       | 66                                  | 0                        | 0.00                        | 96169                          | 1406                         | 1.46                            | 0.069       |
| Serotonin receptor 1A antagonists                    | 4                                   | 0                        | 0.00                        | 96231                          | 1406                         | 1.46                            | 0.004       |
| Serotonin receptor 1B agonists                       | 73                                  | 1                        | 1.37                        | 96162                          | 1405                         | 1.46                            | 0.076       |
| Serotonin receptor 1D agonists                       | 73                                  | 1                        | 1.37                        | 96162                          | 1405                         | 1.46                            | 0.076       |
| Serotonin receptor 1F agonists                       | 59                                  | 0                        | 0.00                        | 96176                          | 1406                         | 1.46                            | 0.061       |
| Serotonin receptor 2A antagonists                    | 119                                 | 2                        | 1.68                        | 96116                          | 1404                         | 1.46                            | 0.124       |
| Serotonin receptor 2B antagonists                    | 33                                  | 2                        | 6.06                        | 96202                          | 1404                         | 1.46                            | 0.034       |
| Serotonin receptor 3A antagonists                    | 47                                  | 0                        | 0.00                        | 96188                          | 1406                         | 1.46                            | 0.049       |
| GABA transaminase inhibitors                         | 29                                  | 2                        | 6.90                        | 96206                          | 1404                         | 1.46                            | 0.030       |
| GABA <sub>A</sub> receptor agonists                  | 732                                 | 17                       | 2.32                        | 95503                          | 1389                         | 1.45                            | 0.761       |
| Glutamate receptor 3 agonists                        | 21                                  | 1                        | 4.76                        | 96214                          | 1405                         | 1.46                            | 0.022       |
| NMDA receptor 1 antagonists                          | 227                                 | 3                        | 1.32                        | 96008                          | 1403                         | 1.46                            | 0.236       |
| NMDA receptor 2D antagonists                         | 227                                 | 3                        | 1.32                        | 96008                          | 1403                         | 1.46                            | 0.236       |
| NMDA receptor 3B antagonists                         | 227                                 | 3                        | 1.32                        | 96008                          | 1403                         | 1.46                            | 0.236       |
| NMDA receptor 3A antagonists                         | 518                                 | 5                        | 0.97                        | 95717                          | 1401                         | 1.46                            | 0.538       |
| Neuronal acetylcholine receptor $\alpha$ antagonists | 12                                  | 1                        | 8.33                        | 96223                          | 1405                         | 1.46                            | 0.012       |
| Muscarinic receptor 1 agonists                       | 3613                                | 62                       | 1.72                        | 92622                          | 1344                         | 1.45                            | 3.754       |
| Muscarinic receptor 1 antagonists                    | 403                                 | 3                        | 0.74                        | 95832                          | 1403                         | 1.46                            | 0.419       |
| Muscarinic receptor 2 antagonists                    | 821                                 | 8                        | 0.97                        | 95414                          | 1398                         | 1.47                            | 0.853       |
| Muscarinic receptor 3 antagonists                    | 224                                 | 0                        | 0.00                        | 96011                          | 1406                         | 1.46                            | 0.233       |
| Muscarinic receptor 4 antagonists                    | 4                                   | 0                        | 0.00                        | 96231                          | 1406                         | 1.46                            | 96235       |
| Cannabinoid receptor 1/2 agonists                    | 3871                                | 56                       | 1.45                        | 92364                          | 1350                         | 1.46                            | 4.022       |
| Fatty acid amide hydrolase inhibitors                | 3871                                | 56                       | 1.45                        | 92364                          | 1350                         | 1.46                            | 4.022       |
| Opioid $\mu$ receptor agonists                       | 1867                                | 26                       | 1.39                        | 94368                          | 1380                         | 1.46                            | 1.940       |
| Opioid $\kappa$ receptor agonists                    | 1840                                | 25                       | 1.36                        | 94395                          | 1381                         | 1.46                            | 1.912       |
| Opioid $\epsilon$ receptor agonists                  | 1840                                | 25                       | 1.36                        | 94395                          | 1381                         | 1.46                            | 1.912       |
| Dopamine transporter inhibitors                      | 1422                                | 26                       | 1.83                        | 94813                          | 1380                         | 1.46                            | 1.478       |
| Dopamine receptor 1 antagonists                      | 43                                  | 0                        | 0.00                        | 96192                          | 1406                         | 1.46                            | 0.045       |
| Dopamine receptor 2 agonists                         | 307                                 | 7                        | 2.28                        | 95928                          | 1399                         | 1.46                            | 0.319       |
| Dopamine receptor 2 antagonists                      | 3790                                | 63                       | 1.66                        | 92445                          | 1343                         | 1.45                            | 3.938       |
| Dopamine receptor 3 agonists                         | 152                                 | 4                        | 2.63                        | 96083                          | 1402                         | 1.46                            | 0.158       |
| Dopamine receptor 3 antagonists                      | 149                                 | 0                        | 0.00                        | 96086                          | 1406                         | 1.46                            | 0.155       |
| Noradrenaline transporter inhibitors                 | 1980                                | 34                       | 1.72                        | 94255                          | 1372                         | 1.46                            | 2.057       |
| Adrenergic receptor $\alpha$ 1A agonists             | 4409                                | 84                       | 1.91                        | 91826                          | 1322                         | 1.44                            | 4.581       |
| Adrenergic receptor $\alpha$ 1A antagonists          | 26                                  | 0                        | 0.00                        | 96209                          | 1406                         | 1.46                            | 0.027       |
| Adrenergic receptor $\alpha$ 1B agonists             | 1579                                | 33                       | 2.09                        | 94656                          | 1373                         | 1.45                            | 1.641       |
| Adrenergic receptor $\alpha$ 1B antagonists          | 9                                   | 0                        | 0.00                        | 96226                          | 1406                         | 1.46                            | 0.009       |
| Adrenergic receptor $\alpha$ 1D agonists             | 1565                                | 32                       | 2.04                        | 94670                          | 1374                         | 1.45                            | 1.626       |
| Adrenergic receptor $\alpha$ 2A agonists             | 3177                                | 55                       | 1.73                        | 93058                          | 1351                         | 1.45                            | 3.301       |
| Adrenergic receptor $\alpha$ 2A antagonists          | 9                                   | 0                        | 0.00                        | 96226                          | 1406                         | 1.46                            | 0.009       |
| Adrenergic receptor $\alpha$ 2B agonists             | 726                                 | 7                        | 0.96                        | 95509                          | 1399                         | 1.46                            | 0.754       |
| Adrenergic receptor $\alpha$ 2C agonists             | 712                                 | 6                        | 0.84                        | 95523                          | 1400                         | 1.47                            | 0.740       |
| Adrenergic receptor $\beta$ 1 agonists               | 148                                 | 3                        | 2.03                        | 96087                          | 1403                         | 1.46                            | 0.154       |
| Adrenergic receptor $\beta$ 1 antagonists            | 337                                 | 8                        | 2.37                        | 95898                          | 1398                         | 1.46                            | 0.350       |
| Adrenergic receptor $\beta$ 2 agonists               | 800                                 | 10                       | 1.25                        | 95435                          | 1396                         | 1.46                            | 0.831       |
| Adrenergic receptor $\beta$ 2 antagonists            | 144                                 | 4                        | 2.78                        | 96091                          | 1402                         | 1.46                            | 0.150       |
| Adenosine receptor A1 antagonists                    | 140                                 | 0                        | 0.00                        | 96095                          | 1406                         | 1.46                            | 0.145       |
| Adenosine receptor A 2A antagonists                  | 144                                 | 0                        | 0.00                        | 96091                          | 1406                         | 1.46                            | 0.150       |
| Adenosine receptor A 2B antagonists                  | 36                                  | 0                        | 0.00                        | 96199                          | 1406                         | 1.46                            | 0.037       |
| Histamine receptor 1 antagonists                     | 3947                                | 68                       | 1.72                        | 92288                          | 1338                         | 1.45                            | 4.101       |
| Histamine receptor 1 agonists                        | 14                                  | 0                        | 0.00                        | 96221                          | 1406                         | 1.46                            | 0.015       |

© 2018 American Medical Association. All rights reserved.

|                                               |     |    |      |       |      |      |       |
|-----------------------------------------------|-----|----|------|-------|------|------|-------|
| <b>Histamine receptor 2 antagonists</b>       | 806 | 17 | 2.11 | 95429 | 1389 | 1.46 | 0.838 |
| <b>Histamine receptor 3 antagonists</b>       | 14  | 0  | 0.00 | 96221 | 1406 | 1.46 | 0.015 |
| <b>Vesicular amine transporter inhibitors</b> | 259 | 5  | 1.93 | 95976 | 1401 | 1.46 | 0.269 |

**. eTable 5. ICD Codes Used to Identify Cases of ASD**

| <b>ICD-9</b>                                                                                                                                                                | <b>ICD-10</b>                                                                                                                                                                                                 |
|-----------------------------------------------------------------------------------------------------------------------------------------------------------------------------|---------------------------------------------------------------------------------------------------------------------------------------------------------------------------------------------------------------|
| 299.0: Infantile Autism<br>299.1: Childhood disintegrative Disorder<br>299.8: Other Pervasive Developmental Disorders<br>299.9: Other Pervasive Developmental Disorders NOS | F84.0: Autistic disorder<br>F84.1: Atypical Autism<br>F84.2: Rett Syndrome<br>F84.5: Asperger Syndrome<br>F84.8: Other Pervasive Developmental Disorders<br>F84.9 Other Pervasive Developmental Disorders NOS |

**eTable 6. ICD Codes Used to Identify Mothers With a History of Psychiatric and Neurological Disorders**

| ICD-9                                                                                                                                                                                                                                                                                                                                                                                                                                                                                                                                                                                                                                                  | ICD-10                                                                                                                                                                                                                                                                                                                                                                                                                                                                                                                                                                                                                                                                                                                                                                                                                                                                                                                                                                                                                                                                                                              |
|--------------------------------------------------------------------------------------------------------------------------------------------------------------------------------------------------------------------------------------------------------------------------------------------------------------------------------------------------------------------------------------------------------------------------------------------------------------------------------------------------------------------------------------------------------------------------------------------------------------------------------------------------------|---------------------------------------------------------------------------------------------------------------------------------------------------------------------------------------------------------------------------------------------------------------------------------------------------------------------------------------------------------------------------------------------------------------------------------------------------------------------------------------------------------------------------------------------------------------------------------------------------------------------------------------------------------------------------------------------------------------------------------------------------------------------------------------------------------------------------------------------------------------------------------------------------------------------------------------------------------------------------------------------------------------------------------------------------------------------------------------------------------------------|
| <p><b>Affective disorders:</b><br/>           296- : Episodic mood disorders<br/>           298.0: Depressive type psychosis<br/>           300.4: Dysthymic disorder<br/>           311: Depressive disorder, not elsewhere classified</p> <p><b>Anxiety disorders:</b><br/>           300.0-: Anxiety states<br/>           300.2-: Phobic disorders<br/>           300.3: Obsessive-compulsive disorder</p> <p><b>Non-affective psychosis:</b><br/>           295-: Schizophrenic disorders<br/>           297-: Delusional disorders<br/>           298-: Other nonorganic psychoses</p> <p><b>Neurological:</b><br/>           345-: Epilepsy</p> | <p><b>Affective disorders:</b><br/>           F30-: Manic episode<br/>           F31-: Bipolar disorder<br/>           F32-: Major depressive disorder, single episode<br/>           F33-: Major depressive disorder, recurrent<br/>           F34-: Persistent mood [affective] disorders<br/>           F39: Unspecified mood [affective] disorders</p> <p><b>Anxiety disorders:</b><br/>           F40-: Phobic anxiety disorders<br/>           F41-: Other anxiety disorders<br/>           F42-: OCD</p> <p><b>Non-affective psychosis:</b><br/>           F20-: Schizophrenia<br/>           F21-: Schizotypal disorder<br/>           F22-: Delusional disorders<br/>           F23-: Brief psychotic disorder<br/>           F24-: Shared psychotic disorder<br/>           F25-: Schizoaffective disorders<br/>           F28-: Other psychotic disorder not due to a substance or known physiological condition<br/>           F29-: Unspecified psychosis not due to a substance or known physiological condition</p> <p><b>Neurological:</b><br/>           G40-: Epilepsy and recurrent seizures</p> |

**eTable 7. Demographic Characteristics of the Full Sample**

|                                                                                | <b>cases</b> | <b>controls</b> | <b>p</b> |
|--------------------------------------------------------------------------------|--------------|-----------------|----------|
| <b>% females</b>                                                               | 19.1         | 49.3            | <2e-16   |
| <b>mean SES (SD)</b>                                                           | 10.3 (4.2)   | 7.6 (4.3)       | <2e-16   |
| <b>mean maternal age (SD)</b>                                                  | 29.9 (5.4)   | 29.7 (5.4)      | 0.225    |
| <b>mean paternal age (SD)</b>                                                  | 32.8 (6.2)   | 32.4 (6.1)      | 0.032    |
| <b>% maternal anxiety disorders</b>                                            | 5.5          | 4.2             | 0.015    |
| <b>% maternal mood disorders</b>                                               | 3.9          | 1.9             | 7.26e-08 |
| <b>% maternal non-affective psychotic disorders</b>                            | <0.1         | 0.2             | 0.247    |
| <b>% mothers neurological disorders</b>                                        | 0.5          | 0.3             | 0.275    |
| <b>Mean maternal diagnoses /healthcare contacts year before pregnancy (SD)</b> | 16.2 (15.2)  | 12.3 (8.7)      | <2e-16   |
| <b>sample size</b>                                                             | <b>1407</b>  | <b>94863</b>    |          |

Controls' descriptives were calculated based on the individuals in the subcohort, excluding the ASD cases. Sample means are presented with their standard deviations. Significance of the group differences was computed using t-test for continuous data and Pearson's Chi2 for count data.

**eTable 8. Schoenfeld Residuals for All Tested Medication Groups**

|                             | rho           | p            |
|-----------------------------|---------------|--------------|
| 5-HTR transporter inh       | 0.002         | 0.936        |
| 5-HTR 1B & 1D ag            | -0.002        | 0.933        |
| 5-HTR 2A ant                | -0.018        | 0.335        |
| 5-HTR 2B ant                | -0.023        | 0.209        |
| GABA transaminase inh       | 0.009         | 0.747        |
| GABA <sub>A</sub> R ag      | -0.017        | 0.519        |
| GluR 3 ag                   | 0.002         | 0.933        |
| NMDAR 1 & 2D & 3B ant       | -0.022        | 0.407        |
| NMDAR receptor 3A ant       | -0.010        | 0.714        |
| nAChR $\alpha$ ant          | -0.037        | 0.151        |
| mAChR 1 ag                  | -0.041        | 0.126        |
| mAChR 1 ant                 | -0.013        | 0.637        |
| mAChR 2 ant                 | -0.002        | 0.940        |
| CBR 1 & 2 ag                | 0.005         | 0.858        |
| OR $\mu$ ag                 | 0.016         | 0.542        |
| OR $\kappa$ & $\epsilon$ ag | 0.013         | 0.626        |
| DA transporter inh          | -0.002        | 0.946        |
| DAR 2 ag                    | <b>0.016</b>  | <b>0.542</b> |
| DAR 2 ant                   | <b>-0.041</b> | <b>0.126</b> |
| DAR 3 ag                    | <b>0.003</b>  | <b>0.914</b> |
| NA transporter inh          | <b>0.003</b>  | <b>0.918</b> |
| NAR $\alpha$ 1A ag          | <b>-0.003</b> | <b>0.902</b> |
| NAR $\alpha$ 1B ag          | 0.010         | 0.716        |
| NAR $\alpha$ 1D ag          | 0.006         | 0.811        |
| NAR $\alpha$ 2A ag          | -0.010        | 0.700        |
| NAR $\alpha$ 2B ag          | 0.027         | 0.319        |
| NAR $\alpha$ 2C ag          | 0.019         | 0.473        |
| NAR $\beta$ 1 ag            | -0.015        | 0.575        |
| NAR $\beta$ 1 ant           | -0.006        | 0.829        |
| NAR $\beta$ 2 ant           | 0.008         | 0.751        |
| NAR $\beta$ 2 ag            | -0.010        | 0.671        |
| Histamine receptor 1 ant    | -0.040        | 0.125        |
| Histamine receptor 2 ant    | -0.026        | 0.323        |
| VAT inh                     | 0.044         | 0.097        |



**eTable 9. Associations Between Prenatal Exposure to Medications and Subsequent Diagnosis of ASD in the Subsample With SES Data**

| ANALYSES WITH SES        |                  |       |                   |      |                    |      |                   |      |
|--------------------------|------------------|-------|-------------------|------|--------------------|------|-------------------|------|
|                          | Model 1          |       | Model 2           |      | Model 3            |      | Model 4           |      |
|                          | HR (95% CI)      | p     | HR (95% CI)       | p    | HR (95% CI)        | p    | HR (95% CI)       | p    |
| 5-HTR transporter inh    | 1.57 (1.11-2.22) | 0.01  | 1.54 (1.09-2.19)  | 0.02 | 1.40 (0.99-1.98)   | 0.06 | 1.15 (0.81-1.62)  | 0.44 |
| 5-HTR 1B & 1D ag         | 1.04 (0.14-7.48) | 0.97  | 0.87 (0.12-6.32)  | 0.89 | 0.83 (0.11-6.00)   | 0.85 | 0.66 (0.09-4.83)  | 0.69 |
| 5-HTR 2A ant             | 1.16 (0.16-8.33) | 0.89  | 1.23 (0.17-8.93)  | 0.84 | 0.90 (0.12-6.60)   | 0.91 | 0.83 (0.11-6.12)  | 0.86 |
| 5-HTR 2B ant             | 4.06 (0.54-30.5) | 0.17  | 3.45 (0.44-27.10) | 0.24 | 2.18 (0.27-17.34)  | 0.46 | 2.40 (0.31-18.63) | 0.40 |
| GABA transaminase inh    | 6.08 (1.47-25.1) | 0.01  | 5.07 (1.17-22.07) | 0.03 | 3.43 (0.81-14.63)  | 0.10 | 3.39 (0.81-14.29) | 0.10 |
| GABA <sub>A</sub> R ag   | 1.73(1.05-2.85)  | 0.03  | 1.96 (1.19-3.23)  | 0.01 | 1.61 (0.98-2.62)   | 0.06 | 1.35 (0.83-2.22)  | 0.22 |
| GluR 3 ag                | 4.83 (0.67-34.8) | 0.12  | 6.83 (1.02-45.9)  | 0.05 | 4.05 (0.58-28.3)   | 0.16 | 4.23 (0.58-30.9)  | 0.16 |
| NMDAR 1 & 2D & 3B ant    | 1.02 (0.32-3.19) | 0.98  | 1.01 (0.32-3.16)  | 0.99 | 1.00 (0.32-3.16)   | 1.00 | 0.68 (0.21-2.14)  | 0.51 |
| NMDAR receptor 3A ant    | 0.75 (0.31-1.82) | 0.53  | 0.82 (0.34-1.99)  | 0.66 | 0.80 (0.33-1.95)   | 0.63 | 0.59 (0.25-1.43)  | 0.24 |
| nAChR α ant              | 9.78 (1.22-78.4) | 0.03  | 17.5 (2.19-140.4) | 0.01 | 40.68 (2.82-587.8) | 0.01 | 54.3 (3.45-856.6) | 0.01 |
| mAChR 1 ag               | 1.12 (0.86-1.48) | 0.40  | 1.05 (0.80-1.38)  | 0.74 | 1.03 (0.78-1.36)   | 0.83 | 0.80 (0.61-1.06)  | 0.12 |
| mAChR 1 ant              | 0.18 (0.03-1.30) | 0.09  | 0.16 (0.02-1.15)  | 0.07 | 0.16 (0.02-1.13)   | 0.07 | 0.12 (0.02-0.87)  | 0.04 |
| mAChR 2 ant              | 0.74 (0.37-1.49) | 0.40  | 0.70 (0.35-1.41)  | 0.32 | 0.70 (0.35-1.41)   | 0.32 | 0.53 (0.27-1.07)  | 0.08 |
| CBR 1 & 2 ag             | 1.03 (0.78-1.36) | 0.86  | 1.08 (0.81-1.42)  | 0.61 | 1.07 (0.81-1.42)   | 0.64 | 0.83(0.62-1.10)   | 0.18 |
| OR μ ag                  | 0.95 (0.63-1.44) | 0.81  | 0.95 (0.62-1.44)  | 0.79 | 0.94 (0.62-1.43)   | 0.77 | 0.70 (0.46-1.07)  | 0.10 |
| OR κ & ε ag              | 0.92 (0.60-1.41) | 0.70  | 0.92 (0.60-1.40)  | 0.69 | 0.91 (0.59-1.39)   | 0.67 | 0.68 (0.44-1.04)  | 0.07 |
| DA transporter inh       | 1.36 (0.92-2.03) | 0.13  | 1.32 (0.88-1.97)  | 0.18 | 1.30 (0.87-1.94)   | 0.20 | 1.02 (0.68-1.52)  | 0.93 |
| DAR 2 ag                 | 1.35 (0.60-3.04) | 0.46  | 1.10 (0.49-2.46)  | 0.83 | 1.06 (0.47-2.38)   | 0.90 | 0.95 (0.42-2.13)  | 0.90 |
| DAR 2 ant                | 1.08 (0.83-1.42) | 0.54  | 1.02 (0.78-1.34)  | 0.89 | 1.00 (0.76-1.31)   | 1.00 | 0.78 (0.59-1.03)  | 0.08 |
| DAR 3 ag                 | 1.38 (0.44-4.36) | 0.58  | 1.24 (0.39-3.93)  | 0.72 | 1.18 (0.37-3.76)   | 0.78 | 0.99 (0.31-3.16)  | 0.99 |
| NA transporter inh       | 1.29 (0.91-1.82) | 0.16  | 1.25 (0.88-1.78)  | 0.21 | 1.23 (0.87-1.75)   | 0.24 | 0.95 (0.67-1.35)  | 0.78 |
| NAR α 1A ag              | 1.41 (1.12-1.78) | <0.01 | 1.34 (1.07-1.69)  | 0.01 | 1.33 (1.06-1.67)   | 0.02 | 1.05 (0.83-1.32)  | 0.70 |
| NAR α 1B ag              | 1.58 (1.11-2.26) | 0.01  | 1.44 (1.01-2.05)  | 0.05 | 1.42 (0.99-2.03)   | 0.05 | 1.14 (0.80-1.63)  | 0.47 |
| NAR α 1D ag              | 1.54 (1.07-2.21) | 0.02  | 1.40 (0.97-2.01)  | 0.07 | 1.38 (0.96-1.99)   | 0.08 | 1.11 (0.77-1.60)  | 0.57 |
| NAR α 2A ag              | 1.24 (0.94-1.65) | 0.13  | 1.17 (0.88-1.55)  | 0.29 | 1.15 (0.87-1.53)   | 0.33 | 0.91 (0.69-1.21)  | 0.51 |
| NAR α 2B ag              | 0.74 (0.35-1.56) | 0.43  | 0.68 (0.32-1.44)  | 0.31 | 0.67 (0.32-1.42)   | 0.30 | 0.55 (0.26-1.16)  | 0.12 |
| NAR α 2C ag              | 0.64 (0.28-1.43) | 0.28  | 0.59 (0.26-1.32)  | 0.20 | 0.58 (0.26-1.31)   | 0.19 | 0.48(0.21-1.07)   | 0.07 |
| NAR β 1 ag               | 0.962 (0.24-3.9) | 0.96  | 1.02 (0.25-4.12)  | 0.98 | 0.99 (0.24-4.02)   | 0.99 | 0.74 (0.18-3.00)  | 0.67 |
| NAR β 1 ant              | 1.50 (0.71-3.17) | 0.29  | 1.63 (0.77-3.47)  | 0.20 | 1.57 (0.74-3.34)   | 0.24 | 1.06 (0.50-2.27)  | 0.88 |
| NAR β 2 ant              | 2.01 (0.74-5.46) | 0.17  | 2.08 (0.76-5.67)  | 0.15 | 1.95 (0.71-5.34)   | 0.20 | 1.27 (0.46-3.49)  | 0.65 |
| NAR β 2 ag               | 0.78 (0.36-1.69) | 0.52  | 0.77 (0.35-1.68)  | 0.51 | 0.76 (0.35-1.65)   | 0.48 | 0.57 (0.26-1.25)  | 0.16 |
| Histamine receptor 1 ant | 1.20 (0.92-1.57) | 0.17  | 1.16 (0.88-1.51)  | 0.29 | 1.14 (0.87-1.49)   | 0.34 | 0.90 (0.69-1.18)  | 0.44 |
| Histamine receptor 2 ant | 1.40 (0.85-2.31) | 0.19  | 1.44 (0.87-2.38)  | 0.16 | 1.39 (0.84-2.30)   | 0.20 | 0.95 (0.57-1.58)  | 0.85 |
| VAT inh                  | 1.46 (0.60-3.54) | 0.41  | 1.35 (0.56-3.27)  | 0.51 | 1.36 (0.56-3.29)   | 0.50 | 1.10 (0.46-2.66)  | 0.83 |

Hazard ratios (HR) are presented with their 95% confidence intervals, and accompanying p-values. Model 1: exposure + year of birth. Model 2: Model 1 + maternal age at birth + SES. Model 3: Model 2 + maternal affective disorders + maternal anxiety disorders + maternal psychotic disorders + maternal neurological disorders. Model 4: Model 3 + maternal general health. All nominally significant results are presented in bold. Ag = agonist; ant = antagonist; inh=inhibitor; 5HTR = serotonin receptor; GABAAR = gamma-Aminobutyric acid A receptor; GluR = glutamate receptor; NMDAR = N-methyl-D-aspartate receptor; nAChR = neuronal acetylcholine receptor; mAChR = muscarinic acetylcholine receptor; CBR = cannabinoid receptor; OR = opioid receptor; DAR = dopamine receptor; NAR = adrenergic receptor; HistR = histamine receptor; VAT = vesicular amine transporter;

**eTable 10. Associations Between Prenatal Exposure to Medications and Subsequent Diagnosis of ASD, Adjusting for Paternal Age**

| ANALYSES WITH PATERNAL AGE    |                  |       |                   |       |                    |       |                    |      |
|-------------------------------|------------------|-------|-------------------|-------|--------------------|-------|--------------------|------|
|                               | Model 1          |       | Model 2           |       | Model 3            |       | Model 4            |      |
|                               | HR (95% CI)      | p     | HR (95% CI)       | p     | HR (95% CI)        | p     | HR (95% CI)        | p    |
| 5-HT transporter inh          | 1.51 (1.02-2.23) | 0.04  | 1.49 (1.01-2.21)  | 0.05  | 1.40 (0.94-2.07)   | 0.09  | 1.08 (0.73-1.60)   | 0.70 |
| 5-HT receptor 1B & 1D ag      | -                |       | -                 |       | -                  |       | -                  |      |
| 5-HT receptor 2A ant          | 1.48 (0.21-10.7) | 0.70  | 1.47 (0.21-10.59) | 0.70  | 1.21 (0.17-8.74)   | 0.85  | 0.96 (0.13-7.08)   | 0.97 |
| 5-HT receptor 2B ant          | 5.18 (0.69-38.8) | 0.11  | 5.04 (0.67-37.64) | 0.12  | 3.80 (0.50-28.65)  | 0.20  | 3.85 (0.50-29.57)  | 0.20 |
| GABA transaminase inh         | 1.58 (0.89-2.80) | 0.12  | 1.57 (0.82-2.78)  | 0.13  | 1.39 (0.79-2.45)   | 0.26  | 1.12 (0.64-1.97)   | 0.68 |
| GABA <sub>A</sub> receptor ag | 1.58 (0.89-2.80) | 0.12  | 1.57 (0.88-2.78)  | 0.13  | 1.39 (0.79-2.45)   | 0.26  | 1.12 (0.64-1.97)   | 0.68 |
| Glu receptor 3 ag             | 6.29 (0.87-45.4) | 0.07  | 6.06 (0.84-43.9)  | 0.07  | 4.38 (0.58-33.2)   | 0.15  | 5.03 (0.62-40.6)   | 0.13 |
| NMDAR 1 & 2D & 3B ant         | 1.16 (0.37-3.66) | 0.79  | 1.15 (0.37-3.60)  | 0.81  | 1.14 (0.36-3.56)   | 0.83  | 0.70 (0.22-2.20)   | 0.54 |
| NMDAR 3A ant                  | 0.90 (0.37-2.17) | 0.81  | 0.89(0.37-2.16)   | 0.80  | 0.88 (0.36-2.12)   | 0.77  | 0.59 (0.25-1.42)   | 0.24 |
| nAChR α ant                   | 10.4 (1.33-82.0) | 0.03  | 10.61 (1.34-83.9) | 0.03  | 17.52 (1.58-194.3) | 0.02  | 26.69 (2.26-315.3) | 0.01 |
| mAChR 1 ag                    | 1.27 (0.96-1.68) | 0.10  | 1.26 (0.95-1.67)  | 0.11  | 1.25 (0.94-1.67)   | 0.12  | 0.86 (0.64-1.16)   | 0.32 |
| mAChR 1 ant                   | 0.67 (0.22-2.09) | 0.49  | 0.66 (0.21-2.07)  | 0.48  | 0.66 (0.21-2.08)   | 0.48  | 0.45 (0.14-1.41)   | 0.17 |
| mAChR 2 ant                   | 0.67 (0.30-1.50) | 0.33  | 0.67 (0.30-1.49)  | 0.33  | 0.67 (0.30-1.49)   | 0.33  | 0.46 (0.21-1.04)   | 0.06 |
| CBR 1 & 2 ag                  | 1.02 (0.75-1.39) | 0.90  | 1.01 (0.74-1.37)  | 0.96  | 1.01 (0.74-1.37)   | 0.95  | 0.72 (0.53-0.98)   | 0.04 |
| OR μ ag                       | 1.25 (0.83-1.86) | 0.28  | 1.24 (0.83-1.85)  | 0.30  | 1.23 (0.83-1.84)   | 0.31  | 0.86 (0.57-1.29)   | 0.46 |
| OR κ & ε ag                   | 1.21 (0.80-1.82) | 0.37  | 1.20 (0.80-1.81)  | 0.38  | 1.20 (0.79-1.80)   | 0.39  | 0.83 (0.55-1.26)   | 0.38 |
| DA transporter inh            | 1.49 (0.99-2.26) | 0.06  | 1.48 (0.97-2.24)  | 0.07  | 1.46 (0.96-2.21)   | 0.08  | 1.09 (0.72-1.65)   | 0.69 |
| DAR 2 ag                      | 1.95 (0.92-4.12) | 0.08  | 1.94 (0.92-4.12)  | 0.08  | 1.91 (0.90-4.05)   | 0.09  | 1.65 (0.78-3.49)   | 0.19 |
| DAR 2 ant                     | 1.21 (0.91-1.60) | 0.20  | 1.20 (0.90-1.59)  | 0.21  | 1.19 (0.90-1.58)   | 0.23  | 0.82 (0.61-1.11)   | 0.20 |
| DAR 3 ag                      | 2.25 (0.83-6.10) | 0.11  | 2.26 (0.83-6.15)  | 0.11  | 2.19 (0.80-5.96)   | 0.13  | 1.76 (0.65-4.79)   | 0.27 |
| NA transporter inh            | 1.35 (0.93-1.95) | 0.12  | 1.33 (0.92-1.94)  | 0.13  | 1.32 (0.91-1.91)   | 0.15  | 0.95 (0.65-1.38)   | 0.78 |
| NAR α 1A ag                   | 1.50 (1.17-1.91) | <0.01 | 1.49 (1.16-1.90)  | <0.01 | 1.48 (1.16-1.89)   | <0.01 | 1.08 (0.85-1.38)   | 0.54 |
| NAR α 1B ag                   | 1.41 (0.94-2.12) | 0.10  | 1.40 (0.93-2.11)  | 0.11  | 1.40 (0.93-2.11)   | 0.11  | 1.04 (0.69-1.55)   | 0.87 |
| NAR α 1D ag                   | 1.36 (0.89-2.06) | 0.15  | 1.35 (0.89-2.05)  | 0.16  | 1.35 (0.89-2.05)   | 0.16  | 1.00 (0.66-1.51)   | 0.99 |
| NAR α 2A ag                   | 1.46 (1.10-1.95) | 0.01  | 1.46 (1.09-1.94)  | 0.01  | 1.45 (1.09-1.93)   | 0.01  | 1.06 (0.80-1.41)   | 0.69 |
| NAR α 2B ag                   | 0.75 (0.34-1.68) | 0.48  | 0.75 (0.34-1.68)  | 0.49  | 0.75 (0.34-1.69)   | 0.49  | 0.57 (0.26-1.28)   | 0.18 |
| NAR α 2C ag                   | 0.63 (0.26-1.52) | 0.31  | 0.63 (0.26-1.53)  | 0.31  | 0.64 (0.26-1.54)   | 0.31  | 0.49 (0.20-1.17)   | 0.11 |
| NAR β 1 ag                    | 1.82 (0.58-5.72) | 0.31  | 1.81 (0.57-5.69)  | 0.31  | 1.80 (0.57-5.67)   | 0.32  | 1.29 (0.41-4.073)  | 0.67 |
| NAR β 1 ant                   | 1.04 (0.39-2.79) | 0.94  | 1.02 (0.38-2.75)  | 0.96  | 1.00 (0.37-2.67)   | 0.99  | 0.62 (0.23-1.67)   | 0.35 |
| NAR β 2 ag                    | 1.02 (0.49-2.12) | 0.95  | 1.02 (0.49-2.10)  | 0.97  | 1.01 (0.49-2.08)   | 0.98  | 0.68 (0.33-1.41)   | 0.30 |
| NAR β 2 ant                   | 1.22 (0.30-4.93) | 0.78  | 1.20 (0.30-4.87)  | 0.80  | 1.15 (0.28-4.69)   | 0.84  | 0.69 (0.17-2.78)   | 0.60 |
| HistR 1 ant                   | 1.24 (0.93-1.65) | 0.15  | 1.23 (0.92-1.64)  | 0.16  | 1.22 (0.92-1.63)   | 0.18  | 0.89 (0.67-1.20)   | 0.43 |
| HistR 2 ant                   | 1.31 (0.73-2.32) | 0.36  | 1.29 (0.73-2.29)  | 0.39  | 1.27 (0.72-2.26)   | 0.41  | 0.81 (0.46-1.44)   | 0.48 |
| VAT inh                       | 1.05 (0.34-3.27) | 0.94  | 1.05 (0.34-3.28)  | 0.93  | 1.05 (0.34-3.28)   | 0.93  | 0.81 (0.26-2.50)   | 0.72 |

Hazard ratios (HR) are presented with their 95% confidence intervals, and accompanying p-values. Model 1: exposure + year of birth. Model 2: Model 1 + maternal age at birth + paternal age at birth. Model 3: Model 2 + maternal affective disorders + maternal anxiety disorders + maternal psychotic disorders + maternal neurological disorders. Model 4: Model 3 + maternal general health. All nominally significant results are presented in bold. None of the children with paternal age data and serotonin receptor 1B/1D agonist exposure developed ASD. Ag = agonist; ant = antagonist; inh=inhibitor; 5HTR = serotonin receptor; GABAAR = gamma-Aminobutyric acid A receptor; GluR = glutamate receptor; NMDAR = N-methyl-D-aspartate receptor; nAChR = neuronal acetylcholine receptor; mAChR = muscarinic acetylcholine receptor; CBR = cannabinoid receptor; OR = opioid receptor; DAR = dopamine receptor; NAR = adrenergic receptor; HistR = histamine receptor; VAT = vesicular amine transporter;

**eTable 11. Associations Between Prenatal Exposure to Medications and Subsequent Diagnosis of ASD, Full Set of Results, Considering Indications 5 and 1 Year Before the Start of Pregnancy**

| ANALYSES WITH DIFFERENT WINDOWS FOR MATERNAL DIAGNOSES |                   |      |                   |      |                   |      |                   |      |
|--------------------------------------------------------|-------------------|------|-------------------|------|-------------------|------|-------------------|------|
|                                                        | Model 3 (5yrs)    |      | Model 4 (5yrs)    |      | Model 3 (1yr)     |      | Model 4 (1yr)     |      |
|                                                        | HR (95% CI)       | p    |
| 5-HT transporter inh                                   | 1.28 (0.91-1.79)  | 0.15 | 1.10 (0.79-1.54)  | 0.58 | 1.29 (0.92-1.80)  | 0.14 | 1.06 (0.76-1.48)  | 0.74 |
| 5-HTR 1B & 1D ag                                       | 0.79 (0.11-5.71)  | 0.82 | 0.64 (0.09-4.66)  | 0.66 | 0.80 (0.11-5.77)  | 0.82 | 0.61 (0.85-4.44)  | 0.63 |
| 5-HTR 2A ant                                           | 0.79 (0.11-5.73)  | 0.82 | 0.71 (0.10-5.15)  | 0.73 | 0.83 (0.12-5.87)  | 0.85 | 0.69 (0.10-4.98)  | 0.72 |
| 5-HTR 2B ant                                           | 2.49 (0.33-18.87) | 0.38 | 2.69 (0.36-20.42) | 0.34 | 2.74 (0.37-20.51) | 0.33 | 2.59 (0.34-1.97)  | 0.36 |
| GABA transaminase inh                                  | 3.61 (0.90-14.49) | 0.07 | 3.52 (0.90-13.72) | 0.07 | 3.37 (0.85-1.34)  | 0.09 | 2.87 (0.74-11.12) | 0.13 |
| GABA <sub>A</sub> R ag                                 | 1.30 (0.81-2.09)  | 0.28 | 1.18 (0.74-1.90)  | 0.49 | 1.33 (0.82-2.14)  | 0.25 | 1.14 (0.71-1.83)  | 0.58 |
| GluR 3 ag                                              | 3.08 (0.42-22.65) | 0.27 | 2.74 (0.35-21.58) | 0.34 | 3.16 (0.42-2.36)  | 0.26 | 3.17 (0.42-2.40)  | 0.26 |
| NMDAR 1 & 2D & 3B ant                                  | 0.82 (0.26-2.58)  | 0.74 | 0.64 (0.20-2.00)  | 0.44 | 0.83 (0.26-2.59)  | 0.75 | 0.57 (0.18-1.80)  | 0.34 |
| NMDAR 3A ant                                           | 0.63 (0.26-1.53)  | 0.31 | 0.51 (0.21-1.24)  | 0.14 | 0.64 (0.27-1.55)  | 0.32 | 0.47 (0.20-1.14)  | 0.09 |
| nAChR α antagonist                                     | 13.1 (1.34-127.7) | 0.03 | 15.8 (1.42-175.8) | 0.03 | 13.6 (1.68-109.4) | 0.01 | 15.5 (1.97-122.0) | 0.01 |
| mAChR 1 ag                                             | 1.08 (0.83-1.39)  | 0.57 | 0.90 (0.69-1.17)  | 0.42 | 1.08 (0.84-1.40)  | 0.55 | 0.83 (0.64-1.08)  | 0.17 |
| mAChR 1 ant                                            | 0.47 (0.15-1.48)  | 0.20 | 0.37 (0.12-1.15)  | 0.09 | 0.49 (0.16-1.52)  | 0.22 | 0.36 (0.11-1.12)  | 0.08 |
| mAChR 2 ant                                            | 0.64 (0.32-1.28)  | 0.21 | 0.51 (0.25-1.02)  | 0.06 | 0.64 (0.32-1.29)  | 0.21 | 0.49 (0.24-0.97)  | 0.05 |
| CBR 1 & 2 ag                                           | 0.95 (0.73-1.24)  | 0.71 | 0.80 (0.61-1.05)  | 0.10 | 0.95 (0.73-1.25)  | 0.73 | 0.74 (0.57-0.97)  | 0.03 |
| OR μ ag                                                | 0.91 (0.61-1.34)  | 0.62 | 0.73 (0.49-1.09)  | 0.12 | 0.91 (0.62-1.35)  | 0.63 | 0.69 (0.46-1.02)  | 0.06 |
| OR κ & ε ag                                            | 0.88 (0.59-1.32)  | 0.54 | 0.71 (0.48-1.07)  | 0.10 | 0.89 (0.59-1.32)  | 0.55 | 0.67 (0.45-1.00)  | 0.05 |
| DA transporter inh                                     | 1.18 (0.80-1.75)  | 0.40 | 0.98 (0.66-1.45)  | 0.93 | 1.19 (0.81-1.76)  | 0.38 | 0.95 (0.64-1.40)  | 0.79 |
| DAR 2 ag                                               | 1.33 (0.63-2.83)  | 0.46 | 1.19 (0.56-2.52)  | 0.65 | 1.34 (0.63-2.84)  | 0.44 | 1.18 (0.56-2.49)  | 0.67 |
| DAR 2 ant                                              | 1.04 (0.81-1.34)  | 0.77 | 0.87 (0.67-1.13)  | 0.29 | 1.05 (0.81-1.35)  | 0.73 | 0.81 (0.63-1.05)  | 0.11 |
| DAR 3 ag                                               | 1.54 (0.56-4.19)  | 0.40 | 1.36 (0.50-3.71)  | 0.54 | 1.56 (0.57-4.24)  | 0.39 | 1.30 (0.48-3.52)  | 0.61 |
| NA transporter inh                                     | 1.10 (0.78-1.55)  | 0.59 | 0.91 (0.64-1.28)  | 0.58 | 1.11 (0.79-1.56)  | 0.56 | 8.65 (0.61-1.22)  | 0.41 |
| NAR α1 A ag                                            | 1.27 (1.01-1.58)  | 0.04 | 1.05 (0.84-1.31)  | 0.65 | 1.27 (1.02-1.58)  | 0.04 | 1.00 (0.80-1.25)  | 1.00 |
| NAR α 1B ag                                            | 1.37 (0.97-1.95)  | 0.08 | 1.15 (0.81-1.64)  | 0.42 | 1.38 (0.97-1.95)  | 0.07 | 1.10 (0.77-1.56)  | 0.60 |
| NAR α 1D ag                                            | 1.34 (0.94-1.91)  | 0.11 | 1.13 (0.79-1.61)  | 0.51 | 1.34 (0.94-1.91)  | 0.11 | 1.07 (0.75-1.53)  | 0.71 |
| NAR α 2A ag                                            | 1.13 (0.86-1.48)  | 0.37 | 0.94 (0.72-1.23)  | 0.66 | 1.13 (0.87-1.49)  | 0.36 | 0.90 (0.68-1.18)  | 0.43 |
| NAR α 2B ag                                            | 0.62 (0.30-1.31)  | 0.21 | 0.53 (0.25-1.12)  | 0.10 | 0.62 (0.30-1.31)  | 0.21 | 0.51 (0.24-1.07)  | 0.07 |
| NAR α2 C ag                                            | 0.54 (0.24-1.21)  | 0.13 | 0.46 (0.21-1.03)  | 0.06 | 0.54 (0.24-1.21)  | 0.13 | 0.44 (0.20-0.99)  | 0.05 |
| NAR β 1 ag                                             | 1.30 (0.41-4.10)  | 0.65 | 1.08 (0.35-3.37)  | 0.89 | 1.33 (0.42-4.18)  | 0.63 | 1.04 (0.33-3.25)  | 0.95 |
| NAR β 1 ant                                            | 1.22 (0.58-2.60)  | 0.60 | 0.97 (0.45-2.06)  | 0.93 | 1.22 (0.58-2.60)  | 0.60 | 0.86 (0.40-1.83)  | 0.70 |
| NAR β 2 ag                                             | 0.80 (0.41-1.59)  | 0.53 | 0.62 (0.31-1.23)  | 0.17 | 0.82 (0.41-1.62)  | 0.56 | 0.61 (0.31-1.21)  | 0.15 |
| NAR β 2 ant                                            | 1.62 (0.59-4.41)  | 0.35 | 1.26 (0.46-3.45)  | 0.65 | 1.63 (0.60-4.42)  | 0.34 | 1.11 (0.40-3.02)  | 0.85 |
| HistR 1 ant                                            | 1.13 (0.88-1.46)  | 0.34 | 0.94 (0.73-1.21)  | 0.64 | 1.14 (0.89-1.47)  | 0.31 | 0.90 (0.70-1.16)  | 0.41 |
| HistR 2 ant                                            | 1.26 (0.78-2.05)  | 0.35 | 0.94 (0.58-1.53)  | 0.80 | 1.27 (0.78-2.05)  | 0.34 | 0.89 (0.55-1.45)  | 0.65 |
| VAT inh                                                | 1.25 (0.52-3.03)  | 0.62 | 1.10 (0.46-2.67)  | 0.83 | 1.25 (0.52-3.03)  | 0.62 | 1.03 (0.43-2.49)  | 0.95 |

Hazard ratios (HR) are presented with their 95% confidence intervals, and accompanying p-values. Model 1: exposure + year of birth. Model 2: Model 1 + maternal age at birth. Model 3: Model 2 + maternal affective disorders + maternal anxiety disorders + maternal psychotic disorders + maternal neurological disorders. Model 4: Model 3 stratified by maternal general health. Models 1 and 2 unchanged compared to those in the main analyses and thus not shown. All nominally significant results are presented in bold. Ag = agonist; ant = antagonist; inh=inhibitor; 5HTR = serotonin receptor; GABAAR = gamma-Aminobutyric acid A receptor; GluR = glutamate receptor; NMDAR = N-methyl-D-aspartate receptor; nAChR = neuronal acetylcholine receptor; mAChR = muscarinic acetylcholine receptor; CBR = cannabinoid receptor; OR = opioid receptor; DAR = dopamine receptor; NAR = adrenergic receptor; HistR = histamine receptor; VAT = vesicular amine transporter;

**eTable 12. Associations Between Prenatal Exposure to Medications and Subsequent Diagnosis of ASD, Full Set of Results, in a Sample Without Sibling Matches**

| ANALYSES WITHOUT SIBLING MATCHES     |                      |       |                      |       |                      |       |                       |       |
|--------------------------------------|----------------------|-------|----------------------|-------|----------------------|-------|-----------------------|-------|
|                                      | Model 1              |       | Model 2              |       | Model 3              |       | Model 4               |       |
|                                      | HR (95% CI)          | p     | HR (95% CI)          | p     | HR (95% CI)          | p     | HR (95% CI)           | p     |
| <b>5-HTR transporter inh</b>         | 1.196 (0.834-1.715)  | 0.33  | 1.214 (0.847- 1.740) | 0.292 | 1.123 (0.787-1.603)  | 0.522 | 0.975 (0.683-1.391)   | 0.888 |
| <b>5-HTR 1B &amp; 1D ag</b>          | 0.701 (0.097-5.064)  | 0.725 | 0.744 (0.103-5.373)  | 0.769 | 0.692 (0.953-5.020)  | 0.716 | 0.580 (0.080-4.2220)  | 0.591 |
| <b>5-HTR 2A ant</b>                  | 1.012 (0.140-7.301)  | 0.991 | 1.042 (0.144-7.515)  | 0.968 | 0.881 (0.123-0.633)  | 0.899 | 0.851 (0.118-6.127)   | 0.873 |
| <b>5-HTR 2B ant</b>                  | 3.221 (0.433-23.990) | 0.253 | 3.373 (0.452-25.145) | 0.236 | 2.404 (0.319-18.120) | 0.395 | 2.224 (0.292-1.692)   | 0.44  |
| <b>GABA transaminase inh</b>         | 4.146 (0.963-17.852) | 0.056 | 4.025 (0.935-17.322) | 0.062 | 3.783 (0.896-15.970) | 0.07  | 3.881 (0.916-16.440)  | 0.066 |
| <b>GABA<sub>A</sub>R ag</b>          | 1.369 (0.830-2.256)  | 0.219 | 1.441 (0.874-2.378)  | 0.152 | 1.265 (0.774-2.067)  | 0.348 | 1.149 (0.707-1.867)   | 0.576 |
| <b>GluR 3 ag</b>                     | 3.695 (0.479-28.529) | 0.21  | 3.626 (0.464-28.357) | 0.22  | 3.177 (0.378-26.730) | 0.288 | 3.086 (0.352-2.705)   | 0.309 |
| <b>NMDAR 1 &amp; 2D &amp; 3B ant</b> | 0.804 (0.256-2.526)  | 0.709 | 0.808 (0.257-2.540)  | 0.716 | 0.800 (0.254-2.519)  | 0.703 | 0.629 (0.199-1.985)   | 0.429 |
| <b>NMDAR receptor 3A ant</b>         | 0.618 (0.256-1.495)  | 0.286 | 0.621 (0.257-1.502)  | 0.291 | 0.614 (0.254-1.488)  | 0.28  | 0.499 (0.208-1.199)   | 0.12  |
| <b>nAChR α ant</b>                   | 5.753 (0.676-48.984) | 0.109 | 6.366 (0.748-54.195) | 0.09  | 0.146 (0.138-155.1)  | 0.026 | 1.938 (1.819-206.40)  | 0.014 |
| <b>mAChR 1 ag</b>                    | 0.907 (0.692-1.189)  | 0.481 | 0.893 (0.681-1.170)  | 0.411 | 0.888 (0.677-1.164)  | 0.39  | 0.748 (0.569-0.983)   | 0.038 |
| <b>mAChR 1 ant</b>                   | 0.142 (0.020-1.011)  | 0.051 | 0.146 (0.020-1.039)  | 0.055 | 0.145 (0.020-1.037)  | 0.054 | 0.118 (0.016-0.842)   | 0.033 |
| <b>mAChR 2 ant</b>                   | 0.567 (0.269-1.199)  | 0.138 | 0.576 (0.272-1.216)  | 0.148 | 0.578 (0.274-1.221)  | 0.151 | 0.476 (0.226-1.005)   | 0.052 |
| <b>CBR 1 &amp; 2 ag</b>              | 0.812 (0.613-1.074)  | 0.144 | 0.806 (0.609-1.066)  | 0.131 | 0.805 (0.608-1.065)  | 0.129 | 0.691 (0.523-0.913)   | 0.009 |
| <b>OR μ ag</b>                       | 0.800 (0.536-1.193)  | 0.274 | 0.806 (0.540-1.203)  | 0.292 | 0.803 (0.5381-1.198) | 0.282 | 0.678 (0.456-1.010)   | 0.056 |
| <b>OR κ &amp; ε ag</b>               | 0.777 (0.517-1.169)  | 0.226 | 0.783 (0.521-1.178)  | 0.24  | 0.780 (0.5.18-1.172) | 0.232 | 0.659 (0.439-0.9.891) | 0.044 |
| <b>DA transporter inh</b>            | 1.006 (0.663-1.525)  | 0.979 | 1.016 (0.670-1.541)  | 0.942 | 1.006 (0.663-1.525)  | 0.979 | 0.844 (0.557-1.281)   | 0.427 |
| <b>DAR 2 ag</b>                      | 1.284 (0.605-2.725)  | 0.515 | 1.309 (0.616-2.779)  | 0.484 | 1.276 (0.599-2.717)  | 0.527 | 1.173 (0.552-2.496)   | 0.678 |
| <b>DAR 2 ant</b>                     | 0.877 (0.671-1.148)  | 0.34  | 0.865 (0.661-1.131)  | 0.29  | 0.862 (0.659-1.127)  | 0.278 | 0.729 (0.556-0.956)   | 0.022 |
| <b>DAR 3 ag</b>                      | 1.529 (0.562-4.163)  | 0.406 | 1.499 (0.551-4.083)  | 0.428 | 1.434 (0.524-3.924)  | 0.483 | 1.295 (0.474-3.541)   | 0.614 |
| <b>NA transporter inh</b>            | 0.965 (0.673-1.383)  | 0.845 | 0.973 (0.679-1.395)  | 0.883 | 0.959 (0.670-1.374)  | 0.82  | 0.803 (0.560-1.151)   | 0.232 |
| <b>NAR α 1A ag</b>                   | 1.092 (0.867-1.376)  | 0.454 | 1.093 (0.867-1.377)  | 0.452 | 1.085 (0.862-1.367)  | 0.487 | 0.924 (0.735-1.162)   | 0.501 |
| <b>NAR α 1B ag</b>                   | 1.277 (0.895-1.824)  | 0.178 | 1.269 (0.889-1.811)  | 0.19  | 1.258 (0.881-1.797)  | 0.207 | 1.092 (0.766-1.558)   | 0.625 |
| <b>NAR α 1D ag</b>                   | 1.241 (0.864-1.781)  | 0.243 | 1.233 (0.859-1.770)  | 0.257 | 1.222 (0.851-1.755)  | 0.277 | 1.063 (0.7.408-1.525) | 0.741 |
| <b>NAR α 2A ag</b>                   | 0.961 (0.723-1.278)  | 0.786 | 0.967 (0.727-1.286)  | 0.817 | 0.962 (0.724-1.279)  | 0.791 | 0.816 (0.614-1.083)   | 0.159 |
| <b>NAR α 2B ag</b>                   | 0.533 (0.238-1.195)  | 0.127 | 0.529 (0.236-1.185)  | 0.122 | 0.529 (0.236-1.186)  | 0.122 | 0.464 (0.207-1.038)   | 0.061 |
| <b>NAR α 2C ag</b>                   | 0.447 (0.185-1.082)  | 0.074 | 0.444 (0.184-1.074)  | 0.071 | 0.444 (0.184-1.074)  | 0.072 | 0.391 (0.162-0.944)   | 0.037 |
| <b>NAR β 1 ag</b>                    | 0.952 (0.234-3.875)  | 0.946 | 0.971 (0.239-3.952)  | 0.967 | 0.993 (0.244-4.045)  | 0.992 | 0.817 (0.202-3.311)   | 0.777 |
| <b>NAR β 1 ant</b>                   | 1.339 (0.661-2.715)  | 0.418 | 1.486 (0.734-3.010)  | 0.271 | 1.464 (0.722-2.968)  | 0.291 | 1.115 (0.548-2.269)   | 0.765 |
| <b>NAR β 2 ant</b>                   | 1.606 (0.589-4.376)  | 0.354 | 1.707 (0.626-4.653)  | 0.296 | 1.641 (0.599-4.493)  | 0.335 | 1.226 (0.447-3.364)   | 0.692 |
| <b>NAR β 2 ag</b>                    | 0.555 (0.263-1.170)  | 0.122 | 0.573 (0.272-1.207)  | 0.143 | 0.572 (0.271-1.205)  | 0.142 | 0.473 (0.224-0.997)   | 0.049 |
| <b>Histamine receptor 1 ant</b>      | 1.024 (0.786-1.335)  | 0.86  | 1.032 (0.792-1.345)  | 0.816 | 1.026 (0.787-1.338)  | 0.85  | 0.866 (0.665-1.128)   | 0.287 |
| <b>Histamine receptor 2 ant</b>      | 1.253 (0.770-2.040)  | 0.364 | 1.278 (0.785-2.081)  | 0.324 | 1.267 (0.778-2.062)  | 0.342 | 0.989 (0.607-1.612)   | 0.966 |
| <b>VAT inh</b>                       | 1.102 (0.453-2.680)  | 0.831 | 1.111 (0.457-2.704)  | 0.816 | 1.116 (0.459-2.713)  | 0.809 | 0.969 (0.400-2.346)   | 0.944 |

Hazard ratios (HR) are presented with their 95% confidence intervals, and accompanying p-values. Model 1: exposure + year of birth. Model 2: Model 1 + maternal age at birth. Model 3: Model 2 + maternal affective disorders + maternal anxiety disorders + maternal psychotic disorders + maternal neurological disorders. Model 4: Model 3 stratified by maternal general health. Models 1 and 2 unchanged compared to those in the main analyses and thus not shown. All nominally significant results are presented in bold. Ag = agonist; ant = antagonist; inh=inhibitor; 5HTR = serotonin receptor; GABA<sub>A</sub>R = gamma-Aminobutyric acid A receptor; GluR = glutamate receptor; NMDAR = N-methyl-D-aspartate receptor; nAChR = neuronal acetylcholine receptor; mAChR = muscarinic acetylcholine receptor; CBR = cannabinoid receptor; OR = opioid receptor; DAR = dopamine receptor; NAR = adrenergic receptor; HistR = histamine receptor; VAT = vesicular amine transporter;

**eTable 13. Associations Between Prenatal Exposure to Medications and Subsequent Diagnosis of ASD, in a Permuted Sample With Random Assignment of ASD Diagnosis to the Cohort Members**

| ANALYSES AFTER RANDOM ASSIGNMENT OF ASD DIAGNOSIS |   |                      |       |                     |       |                      |       |
|---------------------------------------------------|---|----------------------|-------|---------------------|-------|----------------------|-------|
|                                                   |   | Run 1                |       | Run 2               |       | Run 3                |       |
|                                                   |   | HR (95% CI)          | p     | HR (95% CI)         | p     | HR (95% CI)          | p     |
| 5-HTR transporter inh                             | C | 1.310 (0.903-1.899)  | 0.155 | 1.098 (0.728-1.656) | 0.655 | 0.897 (0.573-1.403)  | 0.633 |
|                                                   | A | 1.305 (0.897-1.899)  | 0.165 | 1.075 (0.715-1.617) | 0.727 | 0.893 (0.568-1.404)  | 0.625 |
| 5-HTR 1B & 1D ag                                  | C | 0.706 (0.155-3.202)  | 0.651 | 1.184 (0.266-5.277) | 0.824 | 0.306 (0.0441-2.122) | 0.231 |
|                                                   | A | 0.684 (0.150-3.125)  | 0.624 | 1.135 (0.257-5.008) | 0.867 | 0.302 (0.043-2.124)  | 0.229 |
| 5-HTR 2A ant                                      | C | 1.862 (0.551-6.294)  | 0.317 | 0.772 (0.111-5.373) | 0.794 | 0.796 (0.118-5.388)  | 0.815 |
|                                                   | A | 1.823 (0.534-6.224)  | 0.338 | 0.788 (0.116-5.355) | 0.807 | 0.756 (0.114-5.002)  | 0.771 |
| 5-HTR 2B ant                                      | C | 2.735 (0.360-20.780) | 0.331 | -                   | -     | -                    | -     |
|                                                   | A | 2.718 (0.363-20.355) | 0.330 | -                   | -     | -                    | -     |
| GABA transaminase inh                             | C | -                    | -     | -                   | -     | 3.567 (0.502-25.33)  | 0.204 |
|                                                   | A | -                    | -     | -                   | -     | 6.096 (0.642-57.856) | 0.115 |
| GABA <sub>A</sub> R ag                            | C | 1.301 (0.726-2.333)  | 0.377 | 1.271 (0.706-2.287) | 0.423 | 0.936 (0.471-1.858)  | 0.849 |
|                                                   | A | 1.248 (0.679-2.295)  | 0.476 | 1.298 (0.710-2.373) | 0.398 | 0.895 (0.446-1.795)  | 0.755 |
| GluR 3 ag                                         | C | -                    | -     | -                   | -     | -                    | -     |
|                                                   | A | -                    | -     | -                   | -     | -                    | -     |
| NMDAR 1 & 2D & 3B ant                             | C | 0.804 (0.259-2.496)  | 0.706 | 0.804 (0.259-2.496) | 0.706 | 0.804 (0.259-2.496)  | 0.706 |
|                                                   | A | 1.469 (0.604-3.569)  | 0.396 | 0.843 (0.212-3.355) | 0.809 | 0.433 (0.0619-3.033) | 0.4   |
| NMDAR receptor 3A ant                             | C | 1.423 (0.766-2.641)  | 0.264 | 0.914 (0.401-2.083) | 0.830 | 0.606 (0.234-1.567)  | 0.302 |
|                                                   | A | 1.418 (0.763-2.638)  | 0.270 | 0.881 (0.387-2.006) | 0.763 | 0.606 (0.234-1.566)  | 0.301 |
| nAChR α ant                                       | C | -                    | -     | -                   | -     | -                    | -     |
|                                                   | A | -                    | -     | -                   | -     | -                    | -     |
| mAChR 1 ag                                        | C | 0.875 (0.648-1.182)  | 0.384 | 0.971 (0.728-1.297) | 0.844 | 0.960 (0.714-1.290)  | 0.786 |
|                                                   | A | 0.874 (0.647-1.180)  | 0.378 | 0.950 (0.710-1.272) | 0.731 | 0.956 (0.709-1.288)  | 0.767 |
| mAChR 1 ant                                       | C | 0.812 (0.334-1.972)  | 0.645 | 0.643 (0.223-1.851) | 0.413 | 0.518 (0.157-1.707)  | 0.28  |
|                                                   | A | 0.801 (0.328-1.952)  | 0.625 | 0.613 (0.212-1.775) | 0.367 | 0.514 (0.155-1.705)  | 0.276 |
| mAChR 2 ant                                       | C | 0.713 (0.353-1.441)  | 0.346 | 0.863 (0.451-1.653) | 0.657 | 0.602 (0.268-1.352)  | 0.219 |
|                                                   | A | 0.710 (0.351-1.436)  | 0.340 | 0.826 (0.431-1.584) | 0.565 | 0.604 (0.269-1.359)  | 0.223 |
| CBR 1 & 2 ag                                      | C | 1.096 (0.839-1.431)  | 0.503 | 1.015 (0.768-1.342) | 0.917 | 0.938 (0.701-1.254)  | 0.664 |
|                                                   | A | 1.096 (0.839-1.433)  | 0.501 | 0.988 (0.747-1.308) | 0.935 | 0.934 (0.696-1.253)  | 0.648 |
| OR μ ag                                           | C | 0.938 (0.624-1.409)  | 0.756 | 0.892 (0.585-1.359) | 0.594 | 0.828 (0.538-1.276)  | 0.393 |
|                                                   | A | 0.934 (0.621-1.405)  | 0.744 | 0.859 (0.562-1.311) | 0.480 | 0.834 (0.541-1.287)  | 0.412 |
| OR κ & ε ag                                       | C | 0.949 (0.632-1.426)  | 0.801 | 0.902 (0.592-1.375) | 0.632 | 0.839 (0.545-1.292)  | 0.426 |
|                                                   | A | 0.946 (0.629-1.422)  | 0.789 | 0.869 (0.569-1.327) | 0.516 | 0.845 (0.548-1.304)  | 0.447 |
| DA transporter inh                                | C | 1.242 (0.817-1.888)  | 0.311 | 0.905 (0.551-1.488) | 0.695 | 0.944 (0.590-1.511)  | 0.811 |
|                                                   | A | 1.240 (0.815-1.886)  | 0.316 | 0.873 (0.530-1.439) | 0.595 | 0.951 (0.592-1.526)  | 0.834 |
| DAR 2 ag                                          | C | 0.727 (0.225-2.350)  | 0.594 | 1.916 (0.993-3.698) | 0.053 | 1.682 (0.795-3.563)  | 0.174 |
|                                                   | A | 0.720 (0.223-2.326)  | 0.582 | 1.882 (0.976-3.628) | 0.059 | 1.682 (0.791-3.574)  | 0.177 |
| DAR 2 ant                                         | C | 0.911 (0.682-1.218)  | 0.53  | 0.965 (0.728-1.281) | 0.807 | 0.948 (0.710-1.267)  | 0.720 |
|                                                   | A | 0.911 (0.680-1.219)  | 0.529 | 0.946 (0.711-1.259) | 0.702 | 0.944 (0.703-1.266)  | 0.698 |
| DAR 3 ag                                          | C | 1.261 (0.309-5.140)  | 0.747 | 1.645 (0.612-4.421) | 0.324 | 1.581 (0.492-5.074)  | 0.442 |
|                                                   | A | 1.271 (0.312-5.183)  | 0.739 | 1.611 (0.599-4.331) | 0.345 | 1.582 (0.492-5.082)  | 0.442 |
| NA transporter inh                                | C | 1.350 (0.960-1.899)  | 0.084 | 1.011 (0.673-1.520) | 0.957 | 0.950 (0.634-1.424)  | 0.805 |
|                                                   | A | 1.349 (0.957-1.900)  | 0.087 | 0.977 (0.649-1.471) | 0.91  | 0.954 (0.635-1.434)  | 0.821 |
| NAR α 1A ag                                       | C | 1.117 (0.873-1.429)  | 0.381 | 0.858 (0.642-1.147) | 0.301 | 0.889 (0.670-1.181)  | 0.418 |
|                                                   | A | 1.114 (0.868-1.429)  | 0.397 | 0.831 (0.621-1.113) | 0.215 | 0.889 (0.667-1.184)  | 0.421 |
| NAR α 1B ag                                       | C | 0.936 (0.606-1.443)  | 0.763 | 0.773 (0.473-1.264) | 0.305 | 0.755 (0.448-1.275)  | 0.294 |
|                                                   | A | 0.933 (0.603-1.443)  | 0.754 | 0.756 (0.461-1.238) | 0.266 | 0.755 (0.448-1.272)  | 0.291 |
| NAR α 1D ag                                       | C | 0.938 (0.608-1.447)  | 0.771 | 0.754 (0.456-1.246) | 0.27  | 0.757 (0.449-1.278)  | 0.298 |
|                                                   | A | 0.935 (0.604-1.446)  | 0.762 | 0.736 (0.445-1.220) | 0.235 | 0.757 (0.449-1.275)  | 0.295 |
| NAR α 2A ag                                       | C | 1.058 (0.787-1.424)  | 0.708 | 0.856 (0.611-1.199) | 0.365 | 1.098 (0.813-1.483)  | 0.544 |
|                                                   | A | 1.052 (0.780-1.417)  | 0.742 | 0.827 (0.589-1.161) | 0.272 | 1.102 (0.813-1.494)  | 0.532 |
| NAR α 2B ag                                       | C | 0.697 (0.325-1.494)  | 0.353 | 0.639 (0.295-1.384) | 0.256 | 1.026 (0.527-1.996)  | 0.941 |
|                                                   | A | 0.692 (0.323-1.486)  | 0.346 | 0.627 (0.289-1.360) | 0.237 | 1.027 (0.529-1.996)  | 0.937 |
| NAR α 2C ag                                       | C | 0.700 (0.327-1.501)  | 0.36  | 0.597 (0.264-1.351) | 0.215 | 1.031 (0.530-2.006)  | 0.929 |
|                                                   | A | 0.696 (0.324-1.493)  | 0.352 | 0.585 (0.258-1.327) | 0.200 | 1.033 (0.531-2.006)  | 0.925 |
| NAR β 1 ag                                        | C | 1.023 (0.239-4.385)  | 0.976 | 0.231 (0.033-1.633) | 0.142 | 0.348 (0.048-2.543)  | 0.298 |
|                                                   | A | 1.019 (0.236-4.389)  | 0.980 | 0.229 (0.033-1.633) | 0.142 | 0.348 (0.048-2.543)  | 0.298 |
| NAR β 1 ant                                       | C | 1.443 (0.676-3.082)  | 0.343 | 0.839 (0.313-2.246) | 0.726 | 0.339 (0.073-1.582)  | 0.169 |

|                                     |   |                     |       |                     |       |                     |       |
|-------------------------------------|---|---------------------|-------|---------------------|-------|---------------------|-------|
|                                     | A | 1.396 (0.649-3.002) | 0.393 | 0.764 (0.284-2.057) | 0.595 | 0.341 (0.073-1.602) | 0.173 |
| <b>NAR <math>\beta</math> 2 ant</b> | C | 1.342 (0.452-3.980) | 0.596 | 1.026 (0.273-3.854) | 0.970 | 0.198 (0.027-1.440) | 0.110 |
|                                     | A | 1.305 (0.439-3.879) | 0.632 | 0.965 (0.257-3.621) | 0.958 | 0.197 (0.027-1.437) | 0.109 |
| <b>NAR <math>\beta</math> 2 ag</b>  | C | 0.840 (0.446-1.586) | 0.591 | 0.847 (0.437-1.641) | 0.622 | 0.699 (0.340-1.439) | 0.331 |
|                                     | A | 0.827 (0.437-1.565) | 0.56  | 0.812 (0.419-1.573) | 0.537 | 0.705 (0.341-1.454) | 0.343 |
| <b>Histamine receptor 1 ant</b>     | C | 1.005 (0.753-1.340) | 0.975 | 1.128 (0.853-1.491) | 0.397 | 0.959 (0.696-1.320) | 0.795 |
|                                     | A | 1.003 (0.750-1.340) | 0.986 | 1.091 (0.822-1.449) | 0.546 | 0.969 (0.702-1.337) | 0.848 |
| <b>Histamine receptor 2 ant</b>     | C | 1.542 (0.944-2.519) | 0.084 | 0.728 (0.363-1.459) | 0.371 | 1.334 (0.775-2.298) | 0.298 |
|                                     | A | 1.534 (0.932-2.524) | 0.092 | 0.680 (0.338-1.367) | 0.279 | 1.344 (0.778-2.321) | 0.289 |
| <b>VAT inh</b>                      | C | 2.094 (0.973-4.507) | 0.059 | 1.503 (0.617-3.664) | 0.37  | 1.250 (0.484-3.228) | 0.645 |
|                                     | A | 2.086 (0.968-4.496) | 0.061 | 1.442 (0.591-3.524) | 0.422 | 1.265 (0.489-3.270) | 0.628 |

Runs 1-3 represent independent sets of analyses with different (random) assignment of ASD diagnosis. Rows marked with C show results from the crude (exposure + year of birth), and those marked with A from fully adjusted models (exposure + year of birth maternal affective disorders + maternal anxiety disorders + maternal psychotic disorders + maternal neurological disorders + maternal number of diagnoses). All nominally significant results are presented in bold. Due to low frequencies of certain exposures, after random assignment of ASD diagnoses there were no exposed "cases" for certain groups of drugs in certain runs - in those instances, we entered (-) into appropriate cell. Ag = agonist; ant = antagonist; inh=inhibitor; 5HTR = serotonin receptor; GABAAR = gamma-Aminobutyric acid A receptor; GluR = glutamate receptor; NMDAR = N-methyl-D-aspartate receptor; nAChR = neuronal acetylcholine receptor; mAChR = muscarinic acetylcholine receptor; CBR = cannabinoid receptor; OR = opioid receptor; DAR = dopamine receptor; NAR = adrenergic receptor; HistR = histamine receptor; VAT = vesicular amine transporter;

**eTable 14. Calculations of Necessary Increases in the Standard Errors to Render the Observed Associations Nonsignificant**

|                                                              | Model 1      |       |       |              |                    | Model 4       |       |       |              |                    |
|--------------------------------------------------------------|--------------|-------|-------|--------------|--------------------|---------------|-------|-------|--------------|--------------------|
|                                                              | B            | SE    | RSE   | hypSE        | % change tolerable | B             | SE    | RSE   | hypSE        | % change tolerable |
| <b>GABA transamin inh</b>                                    | <b>1.408</b> | 0.708 | 0.715 | <b>0.718</b> | 0.471*             | 1.147         | 0.741 | 0.685 | <b>0.585</b> | -14.569            |
| <b>nAChR <math>\alpha</math> ant</b>                         | 1.763        | 1.000 | 1.034 | 0.900        | -13.009            | <b>2.560</b>  | 1.074 | 1.154 | <b>1.306</b> | 13.182*            |
| <b>mAChR 2 ant</b>                                           | -0.493       | 0.355 | 0.356 | 0.251        | -29.345            | <b>-0.723</b> | 0.355 | 0.356 | <b>0.369</b> | 3.617*             |
| <b>CBR 1 &amp; 2 ag</b>                                      | -0.115       | 0.136 | 0.137 | 0.059        | -56.857            | <b>-0.323</b> | 0.137 | 0.137 | <b>0.164</b> | 20.289*            |
| <b>OR <math>\kappa</math> &amp; <math>\epsilon</math> ag</b> | -0.173       | 0.202 | 0.203 | 0.088        | -143.480           | <b>-0.407</b> | 0.202 | 0.204 | <b>0.207</b> | 2.292*             |
| <b>NAR <math>\alpha</math> 2C ag</b>                         | -0.668       | 0.409 | 0.410 | <b>0.341</b> | -16.874            | <b>-0.843</b> | 0.410 | 0.410 | <b>0.430</b> | 4.903*             |

B represents effect sizes calculated in the regression (Model 1 – crude, and Model 4 – fully adjusted), SE their standard errors, RSE robust standard errors, hypSE hypothetical standard errors necessary to make the observed associations non-significant (so that  $\text{hypSE} * 1.96 \pm B = 0$ ). % change tolerable column indicates how much the recorded robust standard error could increase (expressed as their own %) before the associations become non-significant. Negative values in that column indicate by how much the standard errors would need to decrease for the effect to be significant. Text highlighted in red indicates the associations that were significant in the main analysis. nAChR = neuronal acetylcholine receptor; mAChR = muscarinic acetylcholine receptor; CBR = cannabinoid receptor; OR = opioid receptor; NAR – adrenergic receptor; inh – inhibitor; ant – antagonist; ag – agonist;
